1     **Gender and comorbidity moderate the relationship between mood disorder**  
2                     **symptoms and effortful avoidance performance**

3 **Abstract**

4 We must often decide how much effort to exert or withhold to avoid undesirable outcomes  
5 or obtain rewards. In depression and anxiety, levels of avoidance tend to be excessive and  
6 reward-seeking is reduced. Yet outstanding questions remain about the links between  
7 motivated action/inhibition and anxiety and depression symptoms, and whether they differ  
8 between men and women. Here we examined the relationship between anxiety and  
9 depression symptoms and performance on effortful active and inhibitory avoidance (Study  
10 1) and reward seeking (Study 2) in humans. Undergraduates and paid online workers  
11 ( $N_{Avoid} = 545$ ,  $N_{Reward} = 310$ ;  $N_{Female} = 368$ ,  $N_{Male} = 450$ ,  $M_{Age} = 22.58$ ,  $Range_{Age} = 17-62$ )  
12 were assessed on the Beck Depression Inventory (BDI-II) and the Beck Anxiety Inventory  
13 (BAI) and performed an instructed online avoidance or reward-seeking task. Participants  
14 had to make multiple presses on active trials and withhold presses on inhibitory trials to  
15 avoid an unpleasant sound (Study 1) or obtain points towards a monetary reward (Study  
16 2). Overall, men deployed more effort than women in both avoidance and reward-seeking,  
17 and anxiety symptoms were negatively associated with active reward-seeking accuracy.  
18 Gender moderated the relationship between anxiety symptoms and inhibitory avoidance,  
19 such that women with higher anxiety showed reduced inhibitory avoidance accuracy.  
20 Anxiety symptoms predicted poorer active avoidance performance for those high in  
21 depression symptoms only. Our results illuminate effects of gender and symptom  
22 comorbidity in the relationship between mood disorder symptoms and the motivation to  
23 actively and effortfully respond to obtain positive and avoid negative outcomes.

24 *Keywords:* avoidance, reward, effort, depression, anxiety

25 Word count: 6824

26 **Gender and comorbidity moderate the relationship between mood disorder**  
27 **symptoms and effortful avoidance performance**

28 **Significance statement**

29 We often need to take effortful action, or withhold action, to avoid unpleasant  
30 outcomes or obtain rewards. Depression and anxiety can impact these behaviours'  
31 effectiveness, but the role of depression in avoidance and anxiety in reward-seeking is not  
32 well understood. Gender differences in avoidance and reward-seeking have also not been  
33 examined. Here, we present a task in which participants had to make or withhold button  
34 presses to avoid hearing an unpleasant sound or to obtain a reward. Men deployed more  
35 effort than women in avoidance, and women with higher levels of anxiety symptoms had  
36 lower inhibitory avoidance accuracy than men. Our results illuminate gender differences in  
37 how depressive and anxiety symptoms impact our ability to avoid threats and obtain  
38 rewards.

39 **Introduction**

40 **Avoidance and reward-seeking behaviours**

41 Living organisms are motivated to avoid potential threats or to acquire rewards  
42 respectively. Often achieving these goals requires action, but it can also require refraining  
43 from action. For example, we may take action to remove a threat's potential harm through  
44 active avoidance, or we may decide that withholding action is the best way to let the threat  
45 pass by, as in inhibitory avoidance (Krypotos, Effting, Kindt, & Beckers, 2015; LeDoux,  
46 Moscarello, Sears, & Campese, 2017). Alternatively, in a situation that offers the  
47 possibility of reward, we may take action to approach the reward through active  
48 reward-seeking or, instead, inhibit pre-potent reward seeking to wait for a larger reward  
49 (Capuzzo & Floresco, 2020; Cools, 2008). Research suggests that the expression of similar  
50 behavioral actions (including inhibition) is dependent on the motivational context (aversive

51 vs. appetitive), which influences the likelihood of selecting a specific action in a specific  
52 motivational context (Wang & Delgado, 2021). However, in neuropsychiatric research,  
53 depressive disorders are often studied with regard to reward-seeking contexts, and anxiety  
54 disorders with regard to avoidance contexts, with little emphasis on the other motivational  
55 context. Symptoms of anxiety and depression have been associated with avoidance,  
56 typically operationalized via active avoidance and via questionnaires, as threats are  
57 overestimated (Bishop & Gagne, 2018; Browning, Behrens, Jocham, O'Reilly, & Bishop,  
58 2015; Cléry-Melin et al., 2011; Mkrtchian, Aylward, Dayan, Roiser, & Robinson, 2017;  
59 Ottenbreit, Dobson, & Quigley, 2014). In depression, reward-seeking may also be impaired  
60 due to a lack of motivation to obtain rewards (Bishop & Gagne, 2018; Slaney et al., 2021).  
61 Past research has established the importance of avoidance and reward-seeking behaviours  
62 in helping us navigate our environment and stay safe (Kryptos et al., 2015; LeDoux et al.,  
63 2017). However, active vs. inhibitory subtypes of these behaviours have not typically been  
64 distinguished – especially through objective measures of observable behavior. Furthermore,  
65 anxiety and depression are often comorbid (Brown, Campbell, Lehman, Grisham, &  
66 Mancill, 2001), and this comorbidity has been linked to excessive avoidance behaviours  
67 (Ottenbreit et al., 2014). However, the role of comorbidity in affecting active vs. inhibitory  
68 avoidance, or reward-seeking, has not been examined.

69 Gender may also be an important variable in this relationship. For example, gender  
70 differences have been identified in the presentation and incidence of mood and anxiety  
71 disorders, such that women have higher rates of depression and present more often with  
72 depression than men (Altemus, Sarvaiya, & Neill Epperson, 2014; Kessler, 2006; Parker &  
73 Brotchie, 2010) and have rates of anxiety disorders that are twice as high as those of men  
74 (McLean, Asnaani, Litz, & Hofmann, 2011; Pittig, Treanor, LeBeau, & Craske, 2018).  
75 However, we do not know how these gender differences manifest themselves in avoidance or  
76 reward-seeking behaviours. Although mood and anxiety disorders are often comorbid, they  
77 also manifest with distinct symptoms and courses that would require distinct strategies to

78 treat in a clinical context (Goldstein-Piekarski, Williams, & Humphreys, 2016; McLean et  
79 al., 2011). In the present study, we ask how mood disorder symptoms impact active  
80 vs. inhibitory avoidance and reward-seeking behaviours in a population of young adults  
81 with depressive and anxiety symptoms ranging from minimal to severe.

82 **The role of mood disorder symptoms and gender differences in avoidance and**  
83 **reward-seeking**

84 It has been proposed that mood and anxiety disorder symptoms shift the perceived  
85 value and costs of avoidance and reward-seeking in sub-optimal ways. The Altered  
86 Computations Underlying Decision Making (ACDM) framework (Bishop & Gagne, 2018)  
87 proposes that anxiety is linked to underestimation of the effort cost in avoiding an aversive  
88 outcome and that depression is linked to overestimation of the effort cost in obtaining a  
89 reward. These effort costs interact with the perceived value of avoidance or reward-seeking  
90 to inform one's decision on whether or not to engage in the behaviour. Past experimental  
91 work has also identified impairments in physical effort deployment for reward in  
92 populations with depression (Pessiglione, Vinckier, Bouret, Daunizeau, & Le Bouc, 2018;  
93 Treadway, Buckholtz, Schwartzman, Lambert, & Zald, 2009; see Culbreth, Moran, & Barch,  
94 2018 for a review) and anxiety (Wang & Delgado, 2021). However, work linking mood and  
95 anxiety disorders to impairments in adaptive avoidance and reward-seeking often focuses  
96 on these avoidance and reward-seeking behaviours as unitary processes. As such, we still  
97 do not know how shifts in perceived effort costs linked to mood and anxiety disorders  
98 manifest themselves in active or inhibitory avoidance or reward-seeking.

99 To better understand the degree to which depressive and anxiety symptoms  
100 contribute to active and inhibitory forms of avoidance or reward-seeking a rigorous  
101 assessment of effort deployment in these behaviors is needed. People with Major Depressive  
102 Disorder (MDD) choose high-effort options less often on effort-based decision making tasks  
103 involving reward. This behaviour is potentially symptomatic of a larger-scale motivational

104 deficit (Pessiglione et al., 2018; Treadway, Bossaller, Shelton, & Zald, 2012; Treadway et al.,  
105 2009). If maladaptive effort deployment is a primary characteristic of mood and anxiety  
106 disorders, then we might expect active avoidance and reward-seeking to be impaired more  
107 than inhibitory forms of these behaviours overall (Culbreth et al., 2018). Anxiety,  
108 especially in the context of depressive symptoms, has been shown to impair our sensitivity  
109 to rewards (Auerbach et al., 2022; Dillon et al., 2014), although whether anxiety's impact  
110 on reward-seeking differs for active or inhibitory behaviours is not yet clear.

111         Additionally, individual differences in the presentation and severity of mood and  
112 anxiety disorders - beyond the mere presence or absence of the disorder - may manifest  
113 with different patterns of active vs. inhibitory behaviours depending on the motivational  
114 context. Among these differences, gender differences are especially prominent. Women  
115 generally present with more depressive symptoms (Parker & Brotchie, 2010) and  
116 experience depression comorbid with anxiety more often than men (Kessler, 2006; McLean  
117 et al., 2011; Ottenbreit et al., 2014). Thus, the impact of mood and anxiety disorders on  
118 our ability to avoid aversive outcomes and seek out rewarding outcomes may be linked to  
119 gender differences that affect the motivational deficits these disorders present. If gender  
120 differences in depressive and anxiety symptom presentation - as captured on self-report  
121 scales (Beck, Steer, & Brown, 1996) - are predicted by differences in accuracy and effort  
122 deployment on active and inhibitory avoidance and reward-seeking tasks, this may help  
123 elucidate how observed gender differences in depressive and anxiety symptoms map on to  
124 real-life behavioural changes.

125         In order to bring our understanding of mood disorder symptoms into a framework  
126 that acknowledges differences in active vs. inhibitory avoidance and reward-seeking  
127 behaviours, we must consider both anxiety and depression in a framework that directly  
128 investigates their impact on these behaviours, and how they might interact to impair  
129 effective avoidance and reward-seeking. While the relationships between anxiety and

130 avoidance (Bishop & Gagne, 2018; Levita, Hoskin, & Champi, 2012; Norbury, Robbins, &  
131 Seymour, 2018), and depression and reward-seeking (Rizvi, Pizzagalli, Sproule, & Kennedy,  
132 2016; Slaney et al., 2021; Treadway et al., 2012) are well established, those between anxiety  
133 and reward-seeking, as well as depression and avoidance, have yet to be fully characterized.  
134 As depression and anxiety can be highly comorbid (Goldstein-Piekarski et al., 2016;  
135 Ottenbreit et al., 2014), parsing which aspects of avoidance and reward-seeking behaviors  
136 are affected uniquely by depressive symptoms, anxiety symptoms, or their common  
137 pathophysiological substrates (Insel et al., 2010), would be important in informing future  
138 depression and anxiety treatments.

### 139 **An effortful avoidance and reward-seeking study**

140 Despite established gender differences in the prevalence and presentation of mood  
141 disorder symptoms (Kessler, 2006; Parker & Brotchie, 2010; Thompson & Bland, 2018), it  
142 is not known how the relationship between mood and anxiety disorder symptoms and  
143 avoidance and reward-seeking differs by gender. Gender differences in motivational deficits  
144 may lead to unique patterns in active and inhibitory behaviours, but this has not been  
145 examined either. As such, in this work, we ask 1) whether anxiety and depression  
146 symptoms predict accuracy and effort deployment on active/inhibitory avoidance  
147 vs. reward-seeking and 2) whether the relationship between mood disorder symptoms and  
148 accuracy is moderated by gender.

149 To address these questions, the present study examined both avoidance and  
150 reward-seeking, each with two non-clinical samples - undergraduates and online workers -  
151 with a broad distribution of mood disorder symptoms. Both studies were reverse-translated  
152 with modification from a series of rodent studies investigating deficits in active and  
153 inhibitory avoidance and reward-seeking behaviours (Capuzzo & Floresco, 2020; Piantadosi,  
154 Yeates, & Floresco, 2018). Our studies are the first to combine intermixed active and  
155 inhibitory avoidance (Levita et al., 2012) or reward-seeking trials with increasing effort

156 requirements throughout the task, requiring participants to switch between withholding  
157 physical effort on inhibitory trials and deploying increasing amounts of effort on active  
158 trials in each task. This design allows us to directly compare performance on active and  
159 inhibitory trials in the context of increasing effort demands. Increasing effort demands may  
160 also pull out differences in choosing an active vs. inhibitory strategy.

## 161 **Materials and Methods**

### 162 **Participants**

163 We powered each study to detect a moderate-sized main effect of  $d = 0.15$  obtained  
164 with a previous study of  $N = 217$  participants using the `fabs` R package (Biesanz, 2020),  
165 resulting in a target sample size of  $N = 549$ . Demographic information for all studies can  
166 be found in Table 1. For each study, we collected data from two samples: an  
167 undergraduate population and an online worker population. The study was approved by  
168 the research ethics board at a location which will be identified if the article is published.

### 169 **Study 1 (Avoidance)**

170 We recruited undergraduate participants at a location which will be identified if the  
171 article is published. These participants received one percentage point towards their grade  
172 in a psychology course of their choosing for completing the study. Of these participants,  $N$   
173  $= 311$  finished the study, of which  $N = 38$  were excluded for not completing the pre-task  
174 survey, having below 50% accuracy on active or inhibitory avoidance trials, spending over  
175 100 s on any given attention check, or not responding to all Beck Anxiety Inventory (BAI)  
176 questions. As such, data from  $N = 273$  participants was used in the data analysis.

177 Additionally, we recruited paid online workers from around the world ( $N = 310$ ) on  
178 the Prolific online study platform (<https://www.prolific.co/>). These participants received  
179 GBP £8.07 for completing the study. Of these participants,  $N = 294$  finished the study, of  
180 which  $N = 22$  were excluded for not completing the pre-task survey, having below 50%



181 accuracy on active or inhibitory avoidance trials, spending over 100 s on any given  
182 attention check, or not responding to all Beck Anxiety Inventory (BAI) questions. As such,  
183 data from  $N = 272$  participants was used in the data analysis.

## 184 **Study 2 (Reward-seeking)**

185 We recruited undergraduate participants at a location which will be identified if the  
186 article is published. These participants received one percentage point towards their grade  
187 in a psychology course of their choosing and a CAD \$5.00 gift card from Starbucks for  
188 completing the study. Of these participants,  $N = 83$  finished the study, of which  $N = 43$   
189 were part of a separate analysis with different stimuli that is beyond the scope of this paper  
190 and  $N = 7$  were excluded for not completing the pre-task survey, having below 50%  
191 accuracy on active or inhibitory avoidance trials, spending over 100 s on any given  
192 attention check, or incorrectly responding to a pre-task attention check. As such, data from  
193  $N = 36$  participants was used in the data analysis.

194 Additionally, we recruited paid online workers from around the world ( $N = 309$ ) on  
195 the Prolific online study platform. These participants received GBP £8.07 and a £2.69  
196 bonus for completing the study. Of these participants,  $N = 300$  finished the study, of which  
197  $N = 26$  were excluded for not completing the pre-task survey, having below 50% accuracy  
198 on active or inhibitory avoidance trials, spending over 100 s on any given attention check,  
199 or incorrectly responding to a pre-task attention check. As such, data from  $N = 274$   
200 participants was used in the data analysis.

201 Overall, the excluded sample was 29.17% female and 70.83% male, while the  
202 analyzed sample was 45.97% female and 54.03% male.

## 203 **Materials and Methods**

204 *Stimulus presentation*

205 We used PsychoPy 2020.1.2 (RRID: SCR\_006571) via the Pavlovia online study  
206 platform (Peirce et al., 2019). Participants completed the study on their own computers;  
207 they were not allowed to complete the study on mobile devices or tablets.

208 *Stimuli*

209 Cues indicating active or inhibitory trials were dark blue squares and circles with a  
210 thin black border and were generated by PsychoPy 2020.1.2 (Peirce et al., 2019) (Fig. 1);  
211 they subtended a visual angle of about 11.5° x 11.5°. All stimuli were presented against a  
212 grey background (RGB value [0,0,0] on a scale from -1 to 1). If participants responded  
213 incorrectly on any trial in the avoidance studies, an aversive sound was played for 2000 ms.  
214 The aversive sounds were randomly selected from a set of eight screeching and scraping  
215 sounds created by our lab and ranked as highly aversive by four independent raters and in  
216 a pilot study.

217 Participants completed a series of questionnaires before beginning the main task.  
218 These were the State-Trait Anxiety Inventory, form Y-2 (STAI Y-2) (Spielberger, 2008);  
219 the Beck Depression Inventory II (BDI-II) (Beck et al., 1996); the Beck Anxiety Inventory  
220 (BAI) (Steer & Beck, 1997); the Behavioral Activation for Depression Scale (BADDS)  
221 (Kanter, Mulick, Busch, Berlin, & Martell, 2007); the Generalized Anxiety Disorder Scale  
222 (GAD-7) (Spitzer, Kroenke, Williams, & Löwe, 2006); and the Behavioural Inhibition Scale  
223 and Behavioural Activation Scale (BIS/BAS) (Carver & White, 1994). In our data  
224 analysis, we looked at results from the BDI-II and BAI as these clinically validated scales  
225 most directly capture participants' levels of current depressive and anxiety symptoms. The  
226 BADDS, GAD-7, and BIS/BAS capture specific behavioural facets of depression and anxiety  
227 that are less relevant to understanding overall effects of mood and anxiety disorders on  
228 avoidance and reward-seeking and were not analyzed in this study. We used the BAI as our  
229 primary measure of anxiety symptoms as it is the most widely used and validated among

230 the anxiety scales we included (Fydrich, Dowdall, & Chambless, 1992) and as its structure  
231 parallels that of the BDI-II.

## 232 **Procedure**

### 233 *Avoidance task*

234 A graphical overview of the avoidance task is provided in Fig. 1A.

235 After calibrating their physical effort capability and the volume of the aversive  
236 stimuli in the task, participants read instructions indicating the shape to which they would  
237 have to respond with multiple spacebar presses as well as the shape to which they would  
238 have to withhold their response. They also heard an example of the aversive sound that  
239 would be played if they made an incorrect decision during the task.

240 Participants then began a series of practice trials in order to gain exposure to the  
241 stimuli and types of responses they would have to make (Fig. 1A). This consisted of five  
242 trials in which participants had to make an active avoidance response - pressing the  
243 spacebar several times to avoid hearing an unpleasant sound; five trials in which  
244 participants had to make an inhibitory avoidance response - not pressing the spacebar to  
245 avoid hearing an aversive sound; and ten trials that intermixed these active and inhibitory  
246 trials.

247 On each trial, participants first viewed a grey screen with a white fixation cross for  
248 a mean duration of 2000 ms with a standard deviation (SD) of 1200 ms, jittered according  
249 to a normal distribution with these parameters on each trial. Participants then saw a  
250 visual cue - either a blue circle or a blue square - for 2000 ms. The cues used for active and  
251 inhibitory trials were pseudorandomly intermixed between participants. While this cue was  
252 on-screen, participants had to press the spacebar multiple times on active avoidance trials  
253 or withhold pressing on inhibitory avoidance trials. On active trials, the number of presses  
254 required was set according to the average number of presses made during the two effort

255 calibration trials, such that participants who pressed fewer times during the calibration  
256 would have to press fewer times to achieve criterion during the task. The initial criterion  
257 was 5 presses given an average of 18 or fewer presses during calibration; a criterion of 6  
258 presses given an average of 19-33 presses inclusive during calibration; and 7 presses given  
259 an average of 19 or more presses during calibration.

260 If participants made an incorrect decision (pressing an insufficient number of times  
261 on active trials or pressing at all on inhibitory trials), participants heard an aversive sound  
262 and saw a fixation cross for 2000 ms. This aversive sound was taken from a set of ten  
263 sounds created by our lab and rated as highly aversive. All sounds were scraping sounds  
264 that had unpleasant psychoacoustic properties shown to reliably induce aversive responses  
265 (Neumann & Waters, 2006) at a variety of frequencies. If participants made a correct  
266 decision (pressing a sufficient number of times on active trials or not pressing on inhibitory  
267 trials), they saw a fixation cross surrounded by a white border on the edges of the screen  
268 for 500 ms.

269 After completing the practice trials and viewing a final screen reminding them of  
270 the instructions, participants began the main task. This consisted of up to 168 active  
271 avoidance trials and 72 inhibitory avoidance trials (70% active and 30% inhibitory),  
272 pseudorandomized such that no more than 6 active trials or 3 inhibitory trials appeared in  
273 a row. On the 15th trial and every 40 trials thereafter, an attention check appeared asking  
274 participants to press a key corresponding to the letter they heard, to ensure that they were  
275 attending to the task and able to hear auditory stimuli. Every 20 trials, the number of  
276 button presses required on active trials increased by one press - this increased the effort  
277 demands on active trials across the task. The task continued until the participant  
278 responded correctly on half or less than half of the last 20 active trials - at this point, the  
279 breakpoint was reached and the participant was thanked for completing the task.

280 ***Reward-seeking task***

281 A graphical overview of the reward-seeking task is provided in Fig. 1B.

282 The design of the reward-seeking task was identical to that of the avoidance task,  
283 with the following exceptions. First, the practice blocks were based on criterion-based  
284 advancement in order to increase consistency with the design of other reward-seeking  
285 studies in our lab. Participants had to achieve at least 80% accuracy in each of the active,  
286 inhibitory, and intermixed reward-seeking trial blocks in order to advance; each block  
287 would repeat until they achieved each criterion. Second, if the participant made a correct  
288 decision during a trial, they would see a screen indicating that they had gained 5 points  
289 along with a sum of their points thus far; if the participant made an incorrect decision  
290 during a trial, they would see a screen indicating that they had gained 0 points along with  
291 a sum of their points thus far. Both screens appeared for 1500 ms. Undergraduate  
292 participants received a CAD \$5 gift card as a reward in addition to course credit for  
293 completing the task; online workers received a GBP £2.69 payment as a reward in addition  
294 to their payment for completing the task. Last, as this task did not incorporate audio, no  
295 volume check or audio-based attention check was included.

296 **Data analysis**

297 All data was analyzed using R 4.1.1 “Kick Things” (R Development Core Team,  
298 2011) through RStudio (Booth et al., 2018). On each behavioural task, we measured 1)  
299 accuracy on active and inhibitory trials, operationalized as the proportion of correct  
300 responses on each trial type; 2) effort on each trial type, operationalized as the number of  
301 presses made relative to criterion on each trial; 3) participants’ depressive and anxiety  
302 symptoms, operationalized as their BDI (Beck et al., 1996) and BAI (Steer & Beck, 1997)  
303 scores respectively; 4) participants’ sensitivity ( $d'$ ) and criterion ( $\beta$ ); and 5) breakpoint,  
304 operationalized as the trial number on which the participant responded correctly on half or  
305 less than half of the last 20 active trials. For each study, we combined undergraduate and

306 online worker samples to obtain a gender-balanced sample. All analyses were Bonferroni  
307 corrected for multiple comparisons. All confidence intervals were based on 1000 bootstrap  
308 replications using the `confintr` R package (Mayer, 2022).

## 309 **Results**

### 310 **Demographics**

311 Participant's reported gender and sex heavily overlapped, with 97.53% overlap in  
312 women and 97.67% overlap in men on the avoidance tasks and 98.84% overlap in women  
313 and 97.80% overlap in men on the reward-seeking task. For this reason, the following  
314 results are expressed in terms of gender only. Women reported higher levels of depressive  
315 symptoms ( $t(723.12) = -3.84, p < .001, d = 0.27$ ) and anxiety symptoms ( $t(706.44) =$   
316  $-4.71, p < .001, d = 0.34$ ) than men across samples (Table 2, Fig. 2A, 5A). Across both  
317 studies, 20.92% of women and 15.11% of men were on medication for depression, and  
318 19.29% of women and 14.89% of men were on medication for anxiety.

### 319 **Avoidance task**

320 We first compared participants' accuracy on active and inhibitory avoidance trials  
321 by gender using a 2x2 within-between ANOVA (Trial Type x Gender) (Fig. 2B) (Table 3).  
322 A main effect revealed that, on average, participants were more accurate on inhibitory than  
323 on active trials ( $F(1, 522) = 405.53, p < .001, \eta^2 = 0.25$ ; Table 4). There was a main effect  
324 of gender ( $F(1, 522) = 5.85, p = .02, \eta^2 = < .01$ ) as well as a gender interaction such that  
325 men had higher accuracy than women on active but not inhibitory avoidance trials ( $F(1,$   
326  $522) = 4.87, p = .03, \eta^2 < .01$ ).

327 Depression and anxiety symptoms were not significantly associated with inhibitory  
328 or active avoidance accuracy (Table 4). However, given observed gender differences in both  
329 depression/anxiety disorder symptoms and task performance, we conducted a series of  
330 moderation analyses using the PROCESS macro (Hayes, 2017) as implemented in `bruceR`

331 (Bao, 2021) to examine whether gender moderated the relationship between accuracy and  
332 anxiety and depressive symptoms (Fig. 3B). We found that gender moderated the  
333 relationship between anxiety symptoms (as measured in BAI scores) and inhibitory  
334 avoidance accuracy ( $F(1, 541) = 4.29, p = .04$ ; Fig. 3A). Increased BAI scores were  
335 associated with lower inhibitory avoidance accuracy in females but not males; this  
336 relationship was not observed for BDI scores. For the full results of the moderation  
337 analysis, see Table 5.

338 To further examine the relationship between accuracy and anxiety and depressive  
339 symptoms, we tested whether BAI scores predicted accuracy in men and women separately.  
340 Outside of the moderation analysis after Bonferroni correction, BAI scores overall  
341 predicted inhibitory but not active avoidance performance accuracy (Fig. 3B, ( $t(543) =$   
342  $-3.01, p = .04, r = -0.13$ )). Additionally, higher BAI scores predicted lower inhibitory  
343 avoidance performance accuracy in women but not men (Fig. 3B; ( $t(260) = -3.73, p = .01,$   
344  $r = -0.23, 95\% CI [-0.36, -0.09]$ )).

345 We also conducted an interactive regression analysis to investigate whether the  
346 relationship between anxiety symptoms and active and inhibitory avoidance accuracy  
347 differed as a function of the level of depressive symptoms (Fig. 4). In active avoidance, the  
348 relationship between anxiety symptoms (BAI scores) and accuracy for all participants was  
349 a function of their level of depressive symptoms (BDI scores) ( $t(541) = -2.65, p = .01$ );  
350 however, this was not the case in inhibitory avoidance ( $t(541) = -0.87, p = .39$ ). As such,  
351 only those with higher levels of depressive symptoms were impaired in active avoidance, and  
352 not those with higher levels of anxiety symptoms but lower levels of depressive symptoms.

353 To account for participants' bias to deploy effort and engage in active as opposed to  
354 inhibitory avoidance in general, we calculated sensitivity ( $d'$ ) and criterion ( $\beta$ ) and  
355 repeated the moderation analyses on these alternative outcome performance measures.  
356 Sensitivity reflects participants' ability to correctly distinguish between active and

357 inhibitory trials and deploy the required amount of effort on active trials only. Criterion  
358 reflects participants' bias towards an active or inhibitory response. Gender did not  
359 moderate the relationship between anxiety or depressive symptoms and sensitivity or  
360 criterion. However, BAI scores predicted sensitivity in women but not men ( $t(260) = -3.55$ ,  
361  $p = .01$ ,  $r = -0.21$ ,  $95\% CI [-0.36, -0.08]$ )).

362 Additionally, we explored the extent to which the amount of effort that participants  
363 deployed to avoid aversive outcomes changed across the task (Fig. 8A). A 2x2  
364 within-between ANOVA (Block x Gender) (Table 6) revealed that participants deployed  
365 increasing amounts of effort during the task to meet increasing effort requirements ( $F(1$ ,  
366  $522) = 405.53$ ,  $p < .001$ ,  $\eta^2 = 0.25$ ), and that men deployed more effort than women across  
367 the task ( $F(1, 522) = 5.85$ ,  $p = 0.016$ ,  $\eta^2 = < .01$ ).

368 Last, we examined whether participants' breakpoint in the task was explained by  
369 their levels of mood and anxiety disorder symptoms in avoidance. After Bonferroni  
370 correction, BAI and BDI scores did not predict overall active or inhibitory avoidance  
371 performance in either men or women (BAI: ( $t(543) = -2.44$ ,  $p = .24$ ,  $r = -0.10$ ,  $95\% CI$   
372  $[-0.19, -0.02]$ ); BDI: ( $t(543) = -2.15$ ,  $p = .51$ ,  $r = -0.09$ ,  $95\% CI [-0.17, -0.01]$ )).

### 373 **Reward-seeking task**

374 We first compared participants' accuracy on active and inhibitory reward-seeking  
375 trials by gender (Fig. 6A) using a 2x2 within-between ANOVA (Trial Type x Gender)  
376 (Table 7). A main effect revealed that, on average, participants were more accurate on  
377 inhibitory than on active trials ( $F(1, 292) = 58.86$ ,  $p < .001$ ,  $\eta^2 = 0.07$ ). There was no  
378 main effect of gender ( $F(1, 292) = 2.61$ ,  $p = .11$ ,  $\eta^2 = 0.01$ ) but there was a gender  
379 interaction such that men had higher accuracy than women on active but not inhibitory  
380 reward-seeking trials ( $F(1, 292) = 7.61$ ,  $p = .01$ ,  $\eta^2 = 0.01$ ).

381 Given observed gender differences in both depressive/anxiety symptoms and task



382 performance, we again conducted a series of moderation analyses to see whether gender  
383 moderated the relationship between accuracy and anxiety and depressive symptoms.  
384 Anxiety was associated with reduced active reward seeking accuracy in the total sample.  
385 However, we found no gender moderation of the relationship between anxiety or depressive  
386 symptoms and active or inhibitory reward-seeking accuracy, and BDI scores did not  
387 interact with active or inhibitory reward-seeking accuracy (Table 8, Table 9, Fig. 6A).

388 To further elucidate the relationship between accuracy and anxiety and depressive  
389 symptoms, we evaluated whether BAI and BDI scores predicted accuracy in men and  
390 women separately. After Bonferroni correction, BAI and BDI scores did not predict overall  
391 active or inhibitory reward-seeking performance in either men or women (Fig. 6B). We also  
392 conducted an interactive regression analysis to investigate whether the relationship  
393 between anxiety symptoms and active and inhibitory reward-seeking accuracy differed as a  
394 function of their level of depressive symptoms (Fig. 7). In active reward-seeking, the  
395 relationship between anxiety symptoms (BAI scores) and accuracy for all participants was  
396 not a function of their level of depressive symptoms (BDI scores) ( $t(306) = 0.45, p = .66$ );  
397 this was also not the case in inhibitory reward-seeking ( $t(306) = -0.78, p = .44$ ).

398 To evaluate participants' bias to deploy effort and engage in active as opposed to  
399 inhibitory reward-seeking, we again calculated sensitivity ( $d'$ ) and criterion ( $\beta$ ) and  
400 performed the moderation analysis using these alternative outcome measures of  
401 performance. Gender did not moderate the relationship between anxiety or depressive  
402 symptoms and sensitivity or criterion.

403 Additionally, we explored how the effort that participants deployed to obtain reward  
404 changed across the task (Fig. 8B). A a 2x2 within-between ANOVA (Block x Gender)  
405 (Table 10) revealed that participants deployed increasing amounts of effort during the task  
406 to meet increasing effort requirements ( $F(1, 292) = 58.86, p = < .001, \eta^2 = 0.07$ ), and  
407 revealed no gender differences in effort deployment ( $F(1, 292) = 2.61, p = .11, \eta^2 = 0.01$ ).

408 Last, we examined whether participants' breakpoint in the task was explained by  
409 their levels of mood and anxiety disorder symptoms in reward-seeking. After Bonferroni  
410 correction, BAI and BDI scores did not predict overall active or inhibitory reward-seeking  
411 performance in either men or women (BAI: ( $t(308) = -0.31, p = 1.00, r = -0.02, 95\% CI$   
412  $[-0.12, 0.04]$ ); BDI: ( $t(308) = -0.75, p = 1.00, r = -0.04, 95\% CI [-0.12, 0.04]$ )).

413

## Discussion

### 414 Summary

415 In the present study, we investigated gender differences in active and inhibitory  
416 avoidance behaviours. Additionally, we explored how mood and anxiety disorder symptoms  
417 negatively impact active vs. inhibitory avoidance and reward-seeking behaviours. Lastly,  
418 we examined whether accuracy and effort deployment in avoidance and reward-seeking are  
419 associated with depressive and anxiety symptoms, and whether the relationship between  
420 accuracy and mood disorder symptoms is moderated by gender. Anxiety symptoms  
421 interacted with participants' depressive symptoms level in active avoidance but not in  
422 active reward-seeking or in inhibitory avoidance or reward-seeking, such that participants'  
423 anxiety symptoms negatively impacted their accuracy more if they also had a high level of  
424 depressive symptoms. Compared to men, women showed higher levels of self-reported  
425 depression and anxiety. Throughout active avoidance and reward-seeking trials, men made  
426 more effortful responses than women. Gender moderated the relationship between anxiety  
427 symptoms and inhibitory avoidance. Women showed lower performance in inhibitory  
428 avoidance than men as a function of higher levels of anxiety symptoms, with no  
429 corresponding effect for depressive symptoms. In contrast, higher levels of anxiety were  
430 associated with lower active reward-seeking performance in both men and women. Our  
431 findings illuminate gender differences in active and inhibitory subtypes of avoidance and  
432 reward-seeking behaviours where effort was required to obtain the desired outcome.

433 **Interpretation of results**

434           Based on previous findings, we can speculate that the gender differences are driven  
435 at least in part by mood and anxiety disorder symptoms. In particular, the observed  
436 gender difference in inhibitory avoidance performance could reflect more general gender  
437 differences in stress tolerance. Parker and Brotchie (2010) argued that women have a  
438 higher predisposition (diathesis) to stress than men and, in our study, women reported  
439 higher anxiety symptoms than men. In our avoidance task, it is advantageous to act to  
440 avoid an aversive outcome - especially given high levels of anxiety symptoms (Bishop &  
441 Gagne, 2018). As such, inhibiting responding may be especially difficult given a  
442 combination of high anxiety symptoms and a decreased tolerance for stress in women  
443 compared to men. Furthermore, this gender difference in diathesis could drive a reduced  
444 ability to inhibit effort when needed - an impairment in shifting from an active to an  
445 inhibitory strategy given higher levels of anxiety symptoms (Gustavson, Altamirano,  
446 Johnson, Whisman, & Miyake, 2017). Given the observed interaction of lower accuracy at  
447 higher depressive and anxiety symptom levels in active avoidance, increased comorbidity of  
448 depressive and anxiety symptoms in women could also partly explain these results -  
449 although this interaction was not significantly observed in the presence of gender  
450 differences in inhibitory avoidance.

451           Beyond inhibitory avoidance, the observed gender differences in effort and accuracy  
452 on active avoidance and reward-seeking trials could reflect gender differences in effort  
453 deployment. Men made more effortful responses relative to criterion than women on active  
454 avoidance trials. This could be caused by women having smaller wrists with which to  
455 generate physical force than men (Morse, Jung, Bashford, & Hallbeck, 2006), as well as  
456 increased testosterone in men - which is associated with increased physical effort  
457 deployment during competitions (Losecaat Vermeer, Riečanský, & Eisenegger, 2016).  
458 Although our tasks did not have competitive elements, participants may still have

459 completed the task with an eye towards maximizing performance. Since deploying more  
460 effort in the task would increase one's chance of staying above criterion, this increased  
461 effort deployment could explain the increased active trial accuracy for men across the  
462 avoidance and reward-seeking tasks. It is important to qualify that gender has a significant  
463 cultural component, and cultural factors could also play a role in gender differences in  
464 effort deployment - perhaps via effects of a lower tolerance for stress on effort deployment  
465 (Parker & Brotchie, 2010).

466 We also found that the effects of anxiety symptoms on active avoidance accuracy  
467 depended on an interaction between anxiety symptoms and depressive symptom level, such  
468 that only those with higher levels of depression symptoms who were also high in anxiety  
469 were impaired. This suggests a role for comorbidity between anxiety and depressive  
470 symptoms in people's ability to deploy effort to actively avoid an unpleasant outcome  
471 (Brown et al., 2001). As such, when those with mood disorder symptoms attempt to avoid  
472 aversive outcomes, impairments to effort deployment necessary for avoidance may be  
473 driven by features of anxiety symptoms and depressive symptoms together, as opposed to  
474 one mood disorder or another independently. Past work has only predicted increases in  
475 effort deployment in avoidance given anxiety and decreases in effort deployment in general  
476 given depression (Bishop & Gagne, 2018). As such, the observed impairment given  
477 symptoms of both mood disorders sheds light on how comorbid mood disorder symptoms  
478 can impact avoidance behaviours. Importantly, this relationship was not observed in  
479 inhibitory avoidance or in active or inhibitory reward-seeking. In inhibitory avoidance,  
480 mood disorder effects were specific to anxiety symptoms in women only, and only anxiety  
481 symptoms significantly impacted active reward-seeking accuracy. As such, it may be that  
482 an anxious subtype of depressive symptoms uniquely impacts our ability to deploy effort to  
483 avoid an unpleasant outcome. This is inconsistent with previous findings by Wurst et al.  
484 (2021) suggesting that there were no significant differences in fear learning – which may be  
485 a process involved in avoidance – between those with anxious and non-anxious depression.

486 However, as our task's difficulty is bound by increasing effort and not learning, and as we  
487 were looking at a non-clinical sample, such effects of comorbidity may not have come out in  
488 the context of our study.

489         The relationship between higher anxiety symptoms and reduced active  
490 reward-seeking performance is novel, as past work has primarily focused on the relationship  
491 between depressive symptoms and reward-seeking and has not focused on subtypes of  
492 avoidance (Bishop & Gagne, 2018). The ways in which depressive symptoms drive reduced  
493 reward sensitivity are well-established (Slaney et al., 2021), but it was previously not clear  
494 whether anxiety symptoms would drive greater success in obtaining rewards (through  
495 underestimation of the effort required to obtain a reward) or reduced reward-seeking  
496 performance (through inefficient allocation of effort that results in increased fatigue). In our  
497 task, participants' performance on effortful active trials was reduced given higher anxiety  
498 symptoms, suggesting that the form of anxiety symptoms participants faced may not have  
499 driven increased effort deployment or reduced effort costs. This finding runs counter to past  
500 work suggesting that trait anxiety is associated with impairments in shifting away from an  
501 effortful task (Gustavson et al., 2017). As we evaluate participants' current as opposed to  
502 trait anxiety, this pattern of results could be explained by anxiety-related impairments to  
503 effort deployment that are reflected in measures of anxiety as a personality trait.

504         Similarly, the relationship between higher anxiety symptoms and reduced inhibitory  
505 avoidance performance differs from previous predictions of improved avoidance given  
506 anxiety symptoms, such as those of Bishop and Gagne (2018). However, Bishop and Gagne  
507 framed this relationship in terms of active and not inhibitory avoidance, as they predicted  
508 that underestimations of effort cost would drive excessive avoidance behaviours. Anxiety  
509 symptoms may be associated with impairments to inhibitory avoidance precisely because of  
510 this bias towards action given the possibility of aversive outcomes, an effect that could be  
511 driven by a perceived lack of control over outcomes in the task (Wang & Delgado, 2021).

512 Additionally, we did not observe a relationship between depressive symptoms and accuracy  
513 or effort deployment in reward-seeking, as has previously been observed (Bishop & Gagne,  
514 2018). The effort demands of the task may not have deterred people with high depressive  
515 symptoms from working for a reward, which could be explained by the depressive  
516 symptoms experienced by participants not impacting effort deployment.

517 Overall, participants had lower accuracy in avoidance compared to reward-seeking;  
518 this could be a function of differences in motivation to engage in avoidance or  
519 reward-seeking. Motivation to complete the tasks can be driven in part by participants'  
520 valuations of task-relevant stimuli (Bishop & Gagne, 2018). A major difference between our  
521 tasks arises in the outcome of an incorrect decision. In avoidance, an incorrect decision is  
522 associated with an aversive sound; in reward-seeking, it is associated with not receiving  
523 points. Although the salience of an aversive sound may suggest that it is more motivating  
524 and would therefore be associated with increased accuracy, hearing it may also be more  
525 demotivating - especially for participants with mood disorder symptoms. Hearing the  
526 aversive sound repeatedly could be a salient indicator of a lack of control over task  
527 outcomes (Wang & Delgado, 2021).

## 528 **Limitations**

529 There are some limitations to our interpretation of our findings. First, since the  
530 dichotomy of the task demands is between effortful active trials and inhibitory trials that  
531 require no effort, we cannot compare the effects of high vs. low effort demands on inhibitory  
532 avoidance or reward-seeking behaviours. As such, our interpretation of the relationship  
533 between effort deployment and mood disorder symptoms only extends to active trials.  
534 Accuracy in the task was likely tied to participants' effort capabilities, as increased effort  
535 deployment was required throughout the task on active trials to meet the criterion level of  
536 effort and make the correct response on the trial. However, we calibrated the criterion to  
537 participants' effort ability and considered accuracy on inhibitory as well as active trials to

538 reduce the reliance of task outcomes on individual differences in effort deployment.  
539 Additionally, as the proportion of active trials was greater than that of inhibitory trials,  
540 participants may have become fatigued on the majority of trials in the task, increasing over  
541 time. This fatigue from effort deployment, combined with boredom (from the task being  
542 repetitive) could be difficult to disentangle from other shifts in motivation to deploy effort  
543 throughout the task (e.g. those related to the value of avoidance or reward-seeking).  
544 However, as fatigue is likely to arise in most physically effortful tasks, our tasks still reflect  
545 real-world physical effort demands. Furthermore, as this study took place online, the study  
546 had to use repeated keyboard presses instead of other, more continuous or better-controlled  
547 measures of physical effort such as a grip squeeze (Aridan, Malecek, Poldrack, & Schonberg,  
548 2019). However, repeated button presses have been validated as being physically effortful  
549 and have been used in in-person contexts (Gold et al., 2013).

## 550 **Future work**

551 Future studies could build on our findings by investigating how patterns of  
552 information about specific aspects of effortful avoidance and reward-seeking are  
553 instantiated in key brain regions. The posterior anterior cingulate cortex (pACC) and  
554 ventral striatum encode information about prospective gains given physical effort  
555 requirements (Aridan et al., 2019). These regions - and their homologues in rodents - have  
556 been shown to be differentially necessary for active vs. inhibitory avoidance (Piantadosi et  
557 al., 2018) and reward-seeking (Capuzzo & Floresco, 2020). Investigating how these regions  
558 represent information on prospective gains and losses relative to effort costs could  
559 illuminate how we weigh the benefits and costs of deploying effort to obtain rewards and  
560 avoid aversive outcomes. Additionally, separating out different factors contributing to effort  
561 deployment through a computational modelling approach would be important to  
562 understand the individual contributions of various factors to participants' performance.  
563 These factors could include action biases (Mkrtchian et al., 2017), perceived value of

564 avoidance or reward (Bishop & Gagne, 2018); or fatigue (Pessiglione et al., 2018).  
565 Furthermore, it would be helpful to evaluate whether subscales of mood disorder symptoms  
566 - potentially linked to subtypes such as anxious depression (Wurst et al., 2021) - pull out  
567 factors that drive participants' behaviours in avoidance and reward seeking. This analysis  
568 could further illuminate our observed gender differences - for example, to evaluate whether  
569 reduced inhibitory avoidance performance in women given increased anxiety symptoms is  
570 reflective of an anxious subtype of depression (Wurst et al., 2021).

## 571 **Conclusion**

572 Our studies address outstanding questions of whether accuracy and effort  
573 deployment on avoidance and reward-seeking predict mood disorder symptoms, and  
574 whether the relationship between accuracy and mood disorder symptoms is moderated by  
575 gender. We separate out active and inhibitory avoidance and reward-seeking behaviours in  
576 a context that allows for direct comparisons between them, instead of considering  
577 avoidance and reward-seeking behaviours as unitary wholes. We highlight gender  
578 differences in each of these subtypes of avoidance and reward-seeking given varying levels  
579 of mood disorder symptoms, contextualizing past work on gender differences in these  
580 symptoms (Parker & Brotchie, 2010). In particular, we are the first to examine these  
581 proposed gender differences in an active and inhibitory avoidance and reward-seeking  
582 context. These findings could inform clinical interventions to address maladaptive  
583 deployment of avoidance and lack of motivation for reward-seeking, targeted by gender.  
584 Additionally, we link active avoidance and reward-seeking to motivation for physical effort  
585 deployment given varying levels of mood and anxiety disorders. As many tasks in life  
586 require physical effort deployment, understanding where it can be impaired is an important  
587 pursuit. Our findings underscore the importance of considering individual differences in the  
588 ways in which avoidance and reward-seeking can be impaired in life.



589 **Data and code availability**

590           The data and materials for all experiments, as well as the code used to generate this  
591 manuscript and conduct all analyses, are available at [URL redacted for double-blind  
592 review].

References

593

594

Altemus, M., Sarvaiya, N., & Neill Epperson, C. (2014). Sex differences in anxiety and depression clinical perspectives. *Frontiers in Neuroendocrinology*, *35*(3), 320–330. <https://doi.org/10.1016/j.yfrne.2014.05.004>

595

596

597

Aridan, N., Malecek, N. J., Poldrack, R. A., & Schonberg, T. (2019). Neural correlates of effort-based valuation with prospective choices. *NeuroImage*, *185*(July 2018), 446–454. <https://doi.org/10.1016/j.neuroimage.2018.10.051>

598

599

600

Auerbach, R. P., Pagliaccio, D., Hubbard, N. A., Frosch, I., Kremens, R., Cosby, E., ... Pizzagalli, D. A. (2022). Reward-Related Neural Circuitry in Depressed and Anxious Adolescents: A Human Connectome Project. *Journal of the American Academy of Child & Adolescent Psychiatry*, *61*(2), 308–320.

601

602

603

604

<https://doi.org/10.1016/j.jaac.2021.04.014>

605

606

Bao, H.-W.-S. (2021). bruceR: Broadly useful convenient and efficient r functions. Retrieved from <https://CRAN.R-project.org/package=bruceR>

607

608

Beck, A. T., Steer, R. A., & Brown, G. K. (1996). Manual for the beck depression inventory-II. *San Antonio, TX: Psychological Corporation*.

609

610

Biesanz, J. (2020). Fabs: Functions for applied behavioural sciences in r. Retrieved from <https://github.com/jbiesanz/fabs%0ACitation%20Key:%20Biesanz2020>

611

612

Bishop, S. J., & Gagne, C. (2018). Anxiety, depression, and decision making: A computational perspective. *Annual Review of Neuroscience*, *41*(1), 371–388.

613

<https://doi.org/10.1146/annurev-neuro-080317-062007>

614

615

Booth, D. S., Szmidt-Middleton, H., King, N., Westbrook, M. J., Young, S. L., Kuo, A., ... Rstudio Team. (2018). RStudio: Integrated development for r. *Nature*.

616

<https://doi.org/10.1108/eb003648>

617

618

Brown, T. A., Campbell, L. A., Lehman, C. L., Grisham, J. R., & Mancill, R. B. (2001). Current and lifetime comorbidity of the DSM-IV anxiety and mood

619

disorders in a large clinical sample. *Journal of Abnormal Psychology*, *110*(4),

- 620 585–599. <https://doi.org/10.1037/0021-843X.110.4.585>
- 621 Browning, M., Behrens, T. E., Jocham, G., O'Reilly, J. X., & Bishop, S. J. (2015).  
622 Anxious individuals have difficulty learning the causal statistics of aversive  
623 environments. *Nature Neuroscience*, *18*(4), 590–596.  
624 <https://doi.org/10.1038/nn.3961>
- 625 Capuzzo, G., & Floresco, S. B. (2020). Prelimbic and infralimbic prefrontal  
626 regulation of active and inhibitory avoidance and reward-seeking. *Journal of*  
627 *Neuroscience*, *40*(24), 4773–4787.  
628 <https://doi.org/10.1523/JNEUROSCI.0414-20.2020>
- 629 Carver, C. S., & White, T. L. (1994). Behavioral inhibition, behavioral activation,  
630 and affective responses to impending reward and punishment: The BIS/BAS  
631 scales. *Journal of Personality and Social Psychology*.  
632 <https://doi.org/10.1037/0022-3514.67.2.319>
- 633 Cléry-Melin, M. L., Schmidt, L., Lafargue, G., Baup, N., Fossati, P., & Pessiglione,  
634 M. (2011). Why don't you try harder? An investigation of effort production in  
635 major depression. *PLoS ONE*, *6*(8).  
636 <https://doi.org/10.1371/journal.pone.0023178>
- 637 Cools, R. (2008). Role of Dopamine in the Motivational and Cognitive Control of  
638 Behavior. *The Neuroscientist*, *14*(4), 381–395.  
639 <https://doi.org/10.1177/1073858408317009>
- 640 Culbreth, A. J., Moran, E. K., & Barch, D. M. (2018). Effort-cost decision-making  
641 in psychosis and depression: Could a similar behavioral deficit arise from  
642 disparate psychological and neural mechanisms? *Psychological Medicine*, *48*(6),  
643 889–904. <https://doi.org/10.1017/S0033291717002525>
- 644 Dillon, D. G., Rosso, I. M., Pechtel, P., Killgore, W. D. S., Rauch, S. L., &  
645 Pizzagalli, D. A. (2014). Peril and pleasure: An RDOC-inspired examination of  
646 threat responses and reward processing in anxiety and depression. *Depression*

- 647           *and Anxiety*, 31(3), 233–249. <https://doi.org/10.1002/da.22202>
- 648           Fydrich, T., Dowdall, D., & Chambless, D. L. (1992). Reliability and validity of the  
649           beck anxiety inventory. *Journal of Anxiety Disorders*, 6(1), 55–61.  
650           [https://doi.org/10.1016/0887-6185\(92\)90026-4](https://doi.org/10.1016/0887-6185(92)90026-4)
- 651           Gold, J. M., Strauss, G. P., Waltz, J. A., Robinson, B. M., Brown, J. K., & Frank,  
652           M. J. (2013). Negative symptoms of schizophrenia are associated with abnormal  
653           effort-cost computations. *Biological Psychiatry*, 74(2), 130–136.  
654           <https://doi.org/10.1016/j.biopsych.2012.12.022>
- 655           Goldstein-Piekarski, A. N., Williams, L. M., & Humphreys, K. (2016). A  
656           trans-diagnostic review of anxiety disorder comorbidity and the impact of  
657           multiple exclusion criteria on studying clinical outcomes in anxiety disorders.  
658           *Translational Psychiatry*, 6(6), e847–e847. <https://doi.org/10.1038/tp.2016.108>
- 659           Gustavson, D. E., Altamirano, L. J., Johnson, D. P., Whisman, M. A., & Miyake, A.  
660           (2017). Is set shifting really impaired in trait anxiety? Only when switching  
661           away from an effortfully established task set. *Emotion*, 17(1), 88–101.  
662           <https://doi.org/10.1037/emo0000212>
- 663           Hayes, A. F. (2017). *Introduction to mediation, moderation, and conditional process*  
664           *analysis: A regression-based approach*. Guilford publications.
- 665           Insel, T., Cuthbert, B., Garvey, M., Heinssen, R., Pine, D. S., Quinn, K., ... Wang,  
666           P. (2010). Research Domain Criteria (RDoC): Toward a New Classification  
667           Framework for Research on Mental Disorders. *American Journal of Psychiatry*,  
668           167(7), 748–751. <https://doi.org/10.1176/appi.ajp.2010.09091379>
- 669           Kanter, J. W., Mulick, P. S., Busch, A. M., Berlin, K. S., & Martell, C. R. (2007).  
670           The Behavioral Activation for Depression Scale (BADs): Psychometric  
671           Properties and Factor Structure. *Journal of Psychopathology and Behavioral*  
672           *Assessment*, 29(3), 191–202. <https://doi.org/10.1007/s10862-006-9038-5>
- 673           Kessler, R. C. (2006). The epidemiology of depression among women. *Women and*

- 674            *Depression: A Handbook for the Social, Behavioral, and Biomedical Sciences*, 74,  
675            22–38. <https://doi.org/10.1017/CBO9780511841262.004>
- 676            Kryptos, A. M., Effting, M., Kindt, M., & Beckers, T. (2015). Avoidance learning:  
677            A review of theoretical models and recent developments. *Frontiers in Behavioral*  
678            *Neuroscience*, 9(July). <https://doi.org/10.3389/fnbeh.2015.00189>
- 679            LeDoux, J. E., Moscarello, J., Sears, R., & Campese, V. (2017). The birth, death  
680            and resurrection of avoidance: A reconceptualization of a troubled paradigm.  
681            *Molecular Psychiatry*, 22(1), 24–36. <https://doi.org/10.1038/mp.2016.166>
- 682            Levita, L., Hoskin, R., & Champi, S. (2012). Avoidance of harm and anxiety: A role  
683            for the nucleus accumbens. *NeuroImage*, 62(1), 189–198.  
684            <https://doi.org/10.1016/j.neuroimage.2012.04.059>
- 685            Losecaat Vermeer, A. B., Riečanský, I., & Eisenegger, C. (2016). Competition,  
686            testosterone, and adult neurobehavioral plasticity (Vol. 229, pp. 213–238).  
687            Elsevier. <https://doi.org/10.1016/bs.pbr.2016.05.004>
- 688            Mayer, M. (2022). *Confintr: Confidence intervals*. Retrieved from  
689            <https://CRAN.R-project.org/package=confintr>
- 690            McLean, C. P., Asnaani, A., Litz, B. T., & Hofmann, S. G. (2011). Gender  
691            differences in anxiety disorders: Prevalence, course of illness, comorbidity and  
692            burden of illness. *Journal of Psychiatric Research*, 45(8), 1027–1035.  
693            <https://doi.org/10.1016/j.jpsychires.2011.03.006>
- 694            Mkrtchian, A., Aylward, J., Dayan, P., Roiser, J. P., & Robinson, O. J. (2017).  
695            Modeling avoidance in mood and anxiety disorders using reinforcement learning.  
696            *Biological Psychiatry*, 82(7), 532–539.  
697            <https://doi.org/10.1016/j.biopsycho.2017.01.017>
- 698            Morse, J. L., Jung, M.-C., Bashford, G. R., & Hallbeck, M. S. (2006). Maximal  
699            dynamic grip force and wrist torque: The effects of gender, exertion direction,  
700            angular velocity, and wrist angle. *Applied Ergonomics*, 37(6), 737–742.

- 701 <https://doi.org/10.1016/j.apergo.2005.11.008>
- 702 Neumann, D. L., & Waters, A. M. (2006). The use of an unpleasant sound as an  
703 unconditional stimulus in a human aversive pavlovian conditioning procedure.  
704 *Biological Psychology*, *73*(2), 175–185.  
705 <https://doi.org/10.1016/j.biopsycho.2006.03.004>
- 706 Norbury, A., Robbins, T. W., & Seymour, B. (2018). Value generalization in human  
707 avoidance learning. *eLife*, *7*(66). <https://doi.org/10.7554/eLife.34779>
- 708 Ottenbreit, N. D., Dobson, K. S., & Quigley, L. (2014). An examination of  
709 avoidance in major depression in comparison to social anxiety disorder.  
710 *Behaviour Research and Therapy*, *56*(1), 82–90.  
711 <https://doi.org/10.1016/j.brat.2014.03.005>
- 712 Parker, G., & Brotchie, H. (2010). Gender differences in depression. *International*  
713 *Review of Psychiatry*, *22*(5), 429–436.  
714 <https://doi.org/10.3109/09540261.2010.492391>
- 715 Peirce, J., Gray, J. R., Simpson, S., MacAskill, M., Höchenberger, R., Sogo, H., ...  
716 Lindeløv, J. K. (2019). PsychoPy2: Experiments in behavior made easy.  
717 *Behavior Research Methods*, *51*(1), 195–203.  
718 <https://doi.org/10.3758/s13428-018-01193-y>
- 719 Pessiglione, M., Vinckier, F., Bouret, S., Daunizeau, J., & Le Bouc, R. (2018). Why  
720 not try harder? Computational approach to motivation deficits in  
721 neuro-psychiatric diseases. *Brain*, *141*(3), 629–650.  
722 <https://doi.org/10.1093/brain/awx278>
- 723 Piantadosi, P. T., Yeates, D. C. M., & Floresco, S. B. (2018). Cooperative and  
724 dissociable involvement of the nucleus accumbens core and shell in the  
725 promotion and inhibition of actions during active and inhibitory avoidance.  
726 *Neuropharmacology*, *138*, 57–71.  
727 <https://doi.org/10.1016/j.neuropharm.2018.05.028>

- 728 Pittig, A., Treanor, M., LeBeau, R. T., & Craske, M. G. (2018). The role of  
729 associative fear and avoidance learning in anxiety disorders: Gaps and directions  
730 for future research. *Neuroscience & Biobehavioral Reviews*, *88*, 117–140.  
731 <https://doi.org/10.1016/j.neubiorev.2018.03.015>
- 732 R Development Core Team, R. (2011). *R: A language and environment for*  
733 *statistical computing*.
- 734 Rizvi, S. J., Pizzagalli, D. A., Sproule, B. A., & Kennedy, S. H. (2016). Assessing  
735 anhedonia in depression: Potentials and pitfalls. *Neuroscience and Biobehavioral*  
736 *Reviews*, *65*, 21–35. <https://doi.org/10.1016/j.neubiorev.2016.03.004>
- 737 Slaney, C., Perkins, A. M., Davis, R., Penton-Voak, I., Munafò, M. R., Houghton, C.  
738 J., & Robinson, E. S. J. (2021). *Objective measures of reward sensitivity and*  
739 *motivation in people with high vs low anhedonia*.  
740 <https://doi.org/10.1101/2021.10.21.21265287>
- 741 Spielberger, C. (2008). State-trait anxiety inventory for adults. *Garden*.
- 742 Spitzer, R. L., Kroenke, K., Williams, J. B. W., & Löwe, B. (2006). A Brief  
743 Measure for Assessing Generalized Anxiety Disorder: The GAD-7. *Archives of*  
744 *Internal Medicine*, *166*(10), 1092. <https://doi.org/10.1001/archinte.166.10.1092>
- 745 Steer, R. A., & Beck, A. T. (1997). Beck anxiety inventory. (pp. 23–40). Lanham,  
746 MD, US: Scarecrow Education.
- 747 Thompson, A. H., & Bland, R. C. (2018). Gender similarities in somatic depression  
748 and in DSM depression secondary symptom profiles within the context of  
749 severity and bereavement. *Journal of Affective Disorders*, *227*(November 2017),  
750 770–776. <https://doi.org/10.1016/j.jad.2017.11.052>
- 751 Treadway, M. T., Bossaller, N. A., Shelton, R. C., & Zald, D. H. (2012).  
752 Effort-based decision-making in major depressive disorder: A translational  
753 model of motivational anhedonia. *Journal of Abnormal Psychology*, *121*(3),  
754 553–558. <https://doi.org/10.1037/a0028813>

- 755 Treadway, M. T., Buckholtz, J. W., Schwartzman, A. N., Lambert, W. E., & Zald,  
756 D. H. (2009). Worth the 'EEfRT'? The effort expenditure for rewards task as an  
757 objective measure of motivation and anhedonia. *PLoS ONE*, *4*(8), 1–9.  
758 <https://doi.org/10.1371/journal.pone.0006598>
- 759 Wang, K. S., & Delgado, M. R. (2021). The Protective Effects of Perceived Control  
760 During Repeated Exposure to Aversive Stimuli. *Frontiers in Neuroscience*, *15*,  
761 625816. <https://doi.org/10.3389/fnins.2021.625816>
- 762 Wurst, C., Schiele, M. A., Stonawski, S., Weiß, C., Nitschke, F., Hommers, L., ...  
763 Menke, A. (2021). Impaired fear learning and extinction, but not generalization,  
764 in anxious and non-anxious depression. *Journal of Psychiatric Research*, *135*,  
765 294–301. <https://doi.org/10.1016/j.jpsychires.2021.01.034>



**Table 1**

*Demographic information for all participants.*

| Study                             | N <sub>recruited</sub> | N <sub>analyzed</sub> | N <sub>female</sub> | N <sub>male</sub> | N <sub>other</sub> | M <sub>age</sub> | Range <sub>age</sub> |
|-----------------------------------|------------------------|-----------------------|---------------------|-------------------|--------------------|------------------|----------------------|
| 1 (Avoidance, undergraduate)      | 357                    | 273                   | 175                 | 86                | 12                 | 20.42            | 17-32                |
| 2 (Avoidance, paid global)        | 310                    | 272                   | 87                  | 176               | 9                  | 24.06            | 18-57                |
| 3 (Reward-seeking, undergraduate) | 114                    | 36                    | 28                  | 8                 | 0                  | 20.67            | 18-26                |
| 4 (Reward-seeking, paid global)   | 309                    | 274                   | 78                  | 180               | 16                 | 25.18            | 18-62                |

**Table 2**

*Mean and SD Beck Depression Inventory II (BDI) and Beck Anxiety Inventory (BAI) proportion scores (score divided by total possible score).*

| Task           | Gender | $M_{BDIprop}$ | $SD_{BDIprop}$ | $M_{BAIprop}$ | $SD_{BAIprop}$ |
|----------------|--------|---------------|----------------|---------------|----------------|
| Avoidance      | Female | 0.30          | 0.19           | 0.30          | 0.22           |
|                | Male   | 0.23          | 0.16           | 0.23          | 0.19           |
| Reward-seeking | Female | 0.29          | 0.19           | 0.28          | 0.21           |
|                | Male   | 0.26          | 0.17           | 0.22          | 0.17           |

**Table 3**

*ANOVA of accuracy on active and inhibitory avoidance trials.*

| Effect            | df <sub>n</sub> | df <sub>d</sub> | <i>F</i> | <i>p</i> | sig. | $\eta^2$ |
|-------------------|-----------------|-----------------|----------|----------|------|----------|
| Gender            | 1               | 522             | 5.85     | 0.016    | *    | < .01    |
| Trial Type        | 1               | 522             | 405.53   | < .001   | ***  | 0.25     |
| Gender:Trial Type | 1               | 522             | 4.87     | 0.028    | *    | < .01    |

**Table 4**

*Relationship between accuracy and mood disorder symptoms on active and inhibitory avoidance trials.*

| Trial Type           | Comparison   | df  | <i>t</i> | <i>p</i> | sig. |
|----------------------|--------------|-----|----------|----------|------|
| Active avoidance     | BDI~accuracy | 541 | -0.32    | 0.75     |      |
|                      | BAI~accuracy | 541 | -1.37    | 0.17     |      |
| Inhibitory avoidance | BDI~accuracy | 541 | -0.87    | 0.38     |      |
|                      | BAI~accuracy | 541 | -0.73    | 0.47     |      |

**Table 5**

*Gender moderation of relationship between accuracy and mood disorder symptoms on active and inhibitory avoidance trials.*

| Trial Type           | Comparison                        | df <sub>n</sub> | df <sub>d</sub> | <i>t</i> | <i>p</i> | sig. |
|----------------------|-----------------------------------|-----------------|-----------------|----------|----------|------|
| Active avoidance     | Gender moderation of BDI~accuracy | 1               | 541             | 0.01     | 0.92     |      |
|                      | Gender moderation of BAI~accuracy | 1               | 541             | 0.28     | 0.59     |      |
| Inhibitory avoidance | Gender moderation of BDI~accuracy | 1               | 541             | 1.04     | 0.31     |      |
|                      | Gender moderation of BAI~accuracy | 1               | 541             | 4.29     | 0.04     | *    |

**Table 6**

*ANOVA of effort deployment on active avoidance trials by gender.*

| Effect       | df <sub>n</sub> | df <sub>d</sub> | <i>F</i> | <i>p</i> | sig. | $\eta^2$ |
|--------------|-----------------|-----------------|----------|----------|------|----------|
| Gender       | 3.00            | 516.00          | 7.08     | < .001   | ***  | 0.03     |
| Block        | 3.37            | 1740.44         | 294.38   | < .001   | ***  | 0.1      |
| Gender:Block | 10.12           | 1740.44         | 0.77     | 0.659    |      | < .001   |

**Table 7**

*ANOVA of accuracy on active and inhibitory reward-seeking trials.*

| Effect             | df <sub>n</sub> | df <sub>d</sub> | <i>F</i> | <i>p</i> | sig. | $\eta^2$ |
|--------------------|-----------------|-----------------|----------|----------|------|----------|
| Gender             | 1               | 292             | 2.61     | 0.107    |      | 0.01     |
| Trial Type         | 1               | 292             | 58.86    | < .001   | ***  | 0.07     |
| Gender: Trial Type | 1               | 292             | 7.61     | 0.006    | **   | 0.01     |

**Table 8**

*Relationship between accuracy and mood disorder symptoms on active and inhibitory reward-seeking trials.*

| Trial Type                | Comparison   | df  | <i>t</i> | <i>p</i> | sig. |
|---------------------------|--------------|-----|----------|----------|------|
| Active reward-seeking     | BDI~accuracy | 306 | -0.52    | 0.61     |      |
|                           | BAI~accuracy | 306 | -2.56    | 0.01     | *    |
| Inhibitory reward-seeking | BDI~accuracy | 306 | -0.54    | 0.59     |      |
|                           | BAI~accuracy | 306 | -0.83    | 0.41     |      |



**Table 9**

*Gender moderation of relationship between accuracy and mood disorder symptoms on active and inhibitory reward-seeking trials.*

| Trial Type                | Comparison                        | df <sub>n</sub> | df <sub>d</sub> | <i>t</i> | <i>p</i> | sig. |
|---------------------------|-----------------------------------|-----------------|-----------------|----------|----------|------|
| Active reward-seeking     | Gender moderation of BDI~accuracy | 1               | 306             | 0.56     | 0.46     |      |
|                           | Gender moderation of BAI~accuracy | 1               | 306             | 3.30     | 0.07     |      |
| Inhibitory reward-seeking | Gender moderation of BDI~accuracy | 1               | 306             | 0.12     | 0.73     |      |
|                           | Gender moderation of BAI~accuracy | 1               | 306             | 0.00     | 0.96     |      |

**Table 10**

*ANOVA of effort deployment on active reward-seeking trials by gender.*

| Effect       | df <sub>n</sub> | df <sub>d</sub> | <i>F</i> | <i>p</i> | sig. | $\eta^2$ |
|--------------|-----------------|-----------------|----------|----------|------|----------|
| Gender       | 3.00            | 379.00          | 2.03     | 0.11     |      | 0.01     |
| Block        | 3.39            | 1283.92         | 387.02   | < .001   | ***  | 0.16     |
| Gender:Block | 10.16           | 1283.92         | 0.43     | 0.936    |      | < .001   |

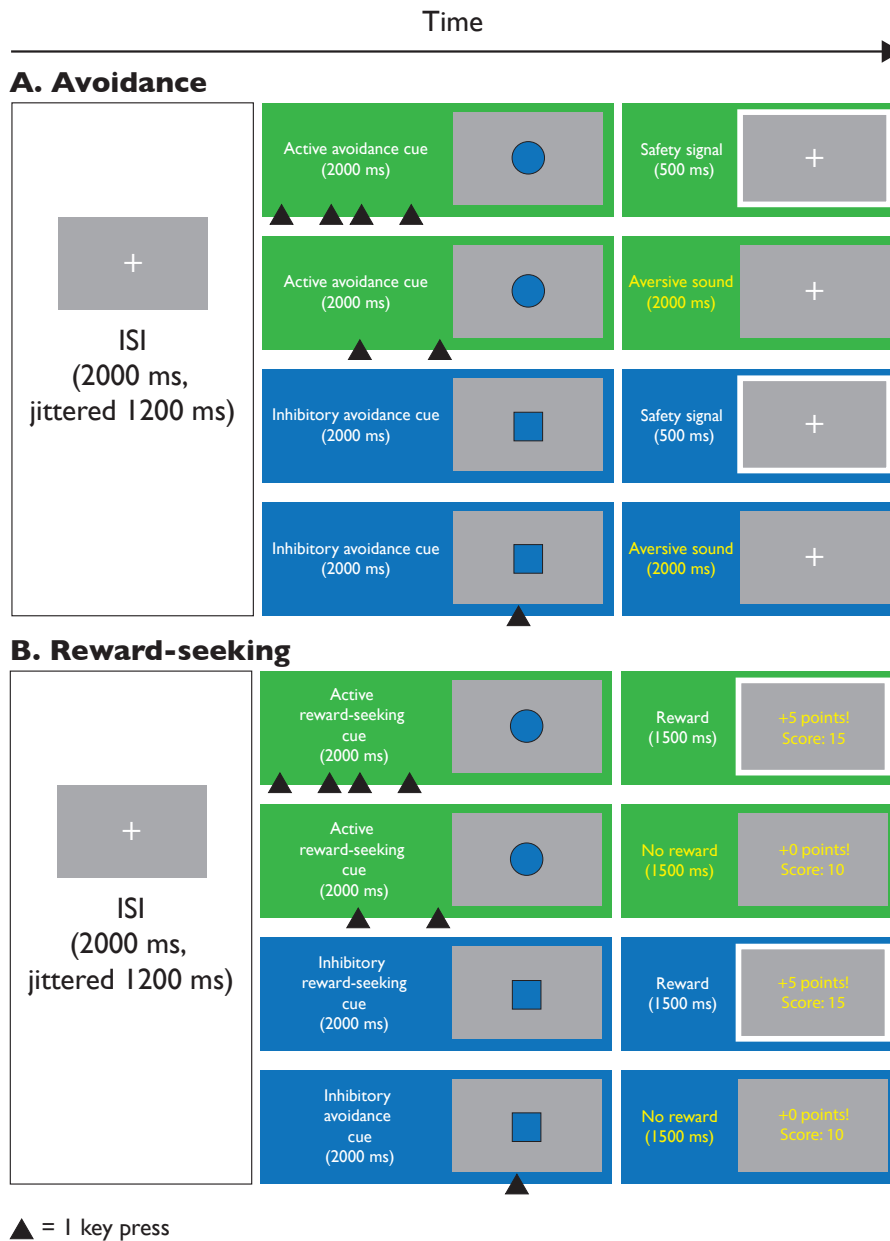

**Figure 1**

A diagram of the active and inhibitory avoidance and reward-seeking tasks. In the avoidance task (A), after an inter-stimulus interval (ISI) with a fixation cross onscreen, participants were presented with a cue associated with active or inhibitory avoidance. For the active avoidance cue, participants had to respond with repeated spacebar presses to avoid hearing an aversive sound. For the inhibitory avoidance cue, participants had to withhold responding to avoid hearing an aversive sound. In the reward-seeking task (B), after the ISI, participants were presented with a cue associated with active or inhibitory reward-seeking. For the active reward-seeking cue, participants had to respond with repeated spacebar presses to obtain points towards a monetary reward. For the inhibitory reward-seeking cue, participants had to withhold responding to obtain points towards a monetary reward. ISI = Inter-stimulus interval.

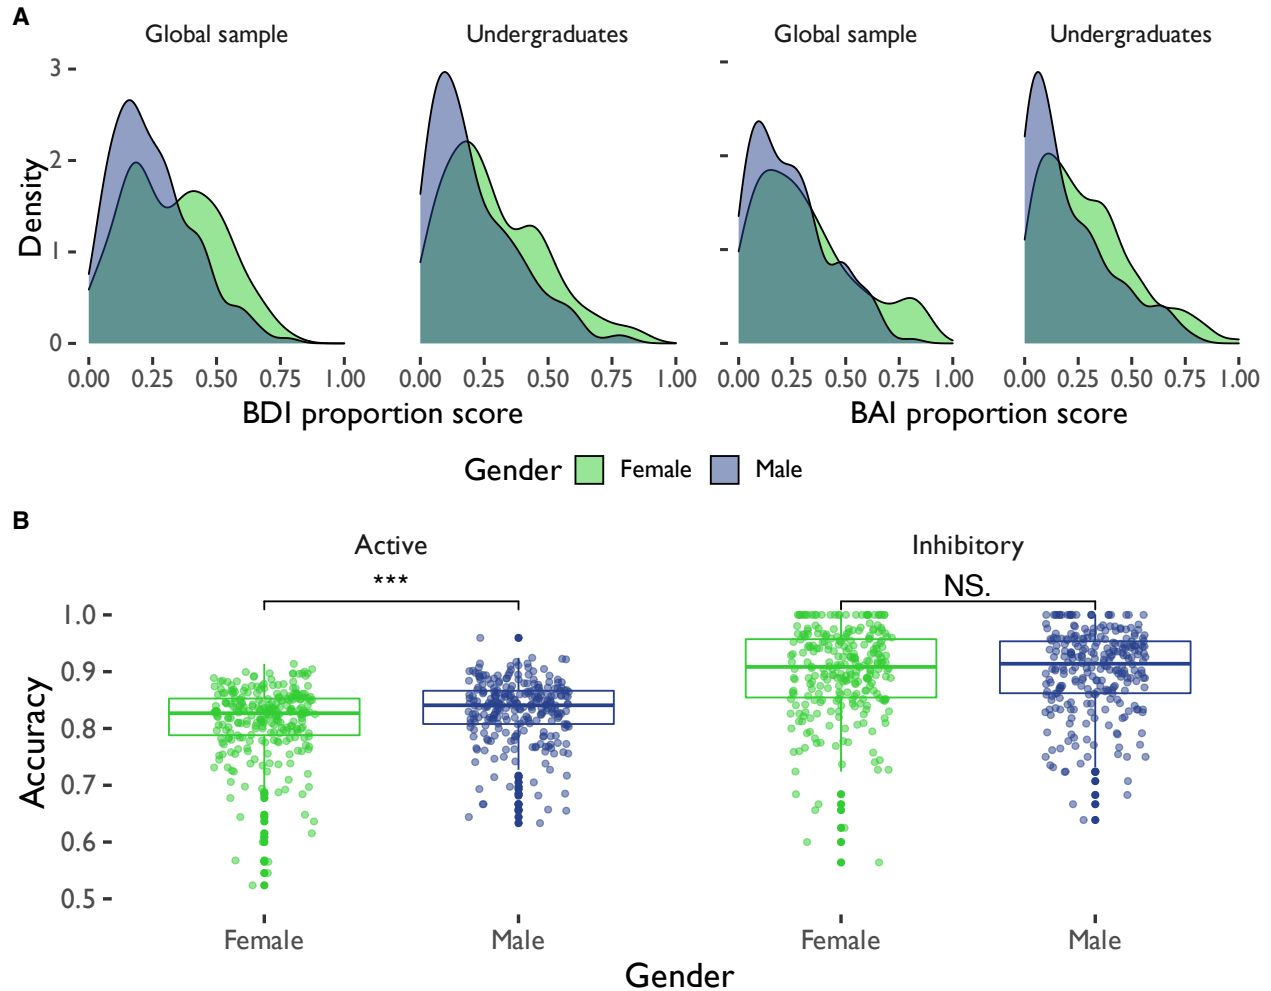

**Figure 2**

(A) Distribution of anxiety (BAI) and depressive symptom (BDI) proportion scores (score divided by total possible score) by gender and sample. (B) Accuracy by gender on active and inhibitory avoidance, and moderation of the relationship between accuracy and anxiety (BAI) scores by gender. Dots represent average accuracy on each trial type by participant. BAI = Beck Anxiety Inventory, BDI = Beck Depression Inventory.

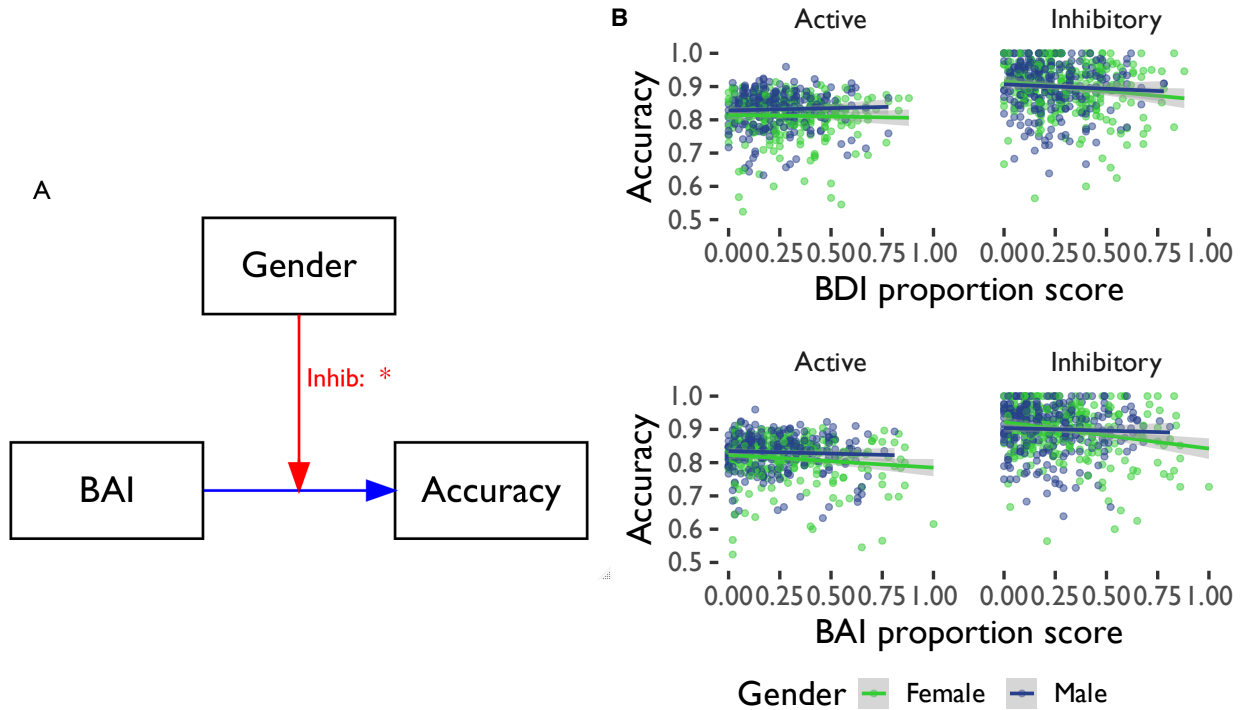

**Figure 3**

(A) Moderation of the relationship between accuracy and anxiety (BAI) proportion scores by gender in active and inhibitory avoidance. Gender significantly moderated the relationship between anxiety symptoms (BAI proportion scores) and inhibitory avoidance accuracy. (B) Accuracy by gender on active and inhibitory avoidance. BAI = Beck Anxiety Inventory. Proportion scores are scores divided by total possible score.

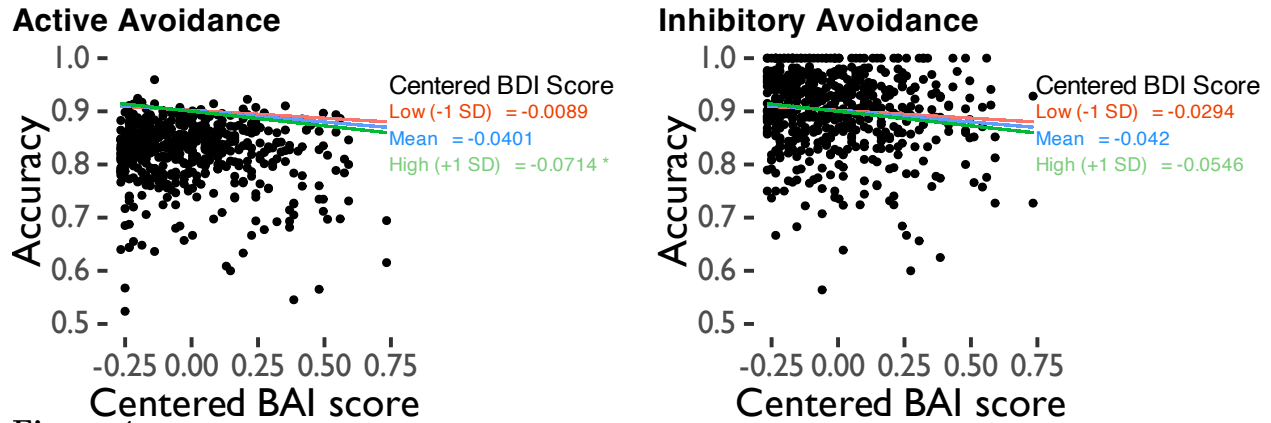

Figure 4

Interactive regression analysis output for active and inhibitory avoidance. BAI = Beck Anxiety Inventory, BDI = Beck Depression Inventory. Numbers on right indicate coefficients for regression lines at each level of BDI score (centred 1 standard deviation below the mean, at the mean, and 1 standard deviation above the mean).

## GENDER AND EFFORTFUL AVOIDANCE

47

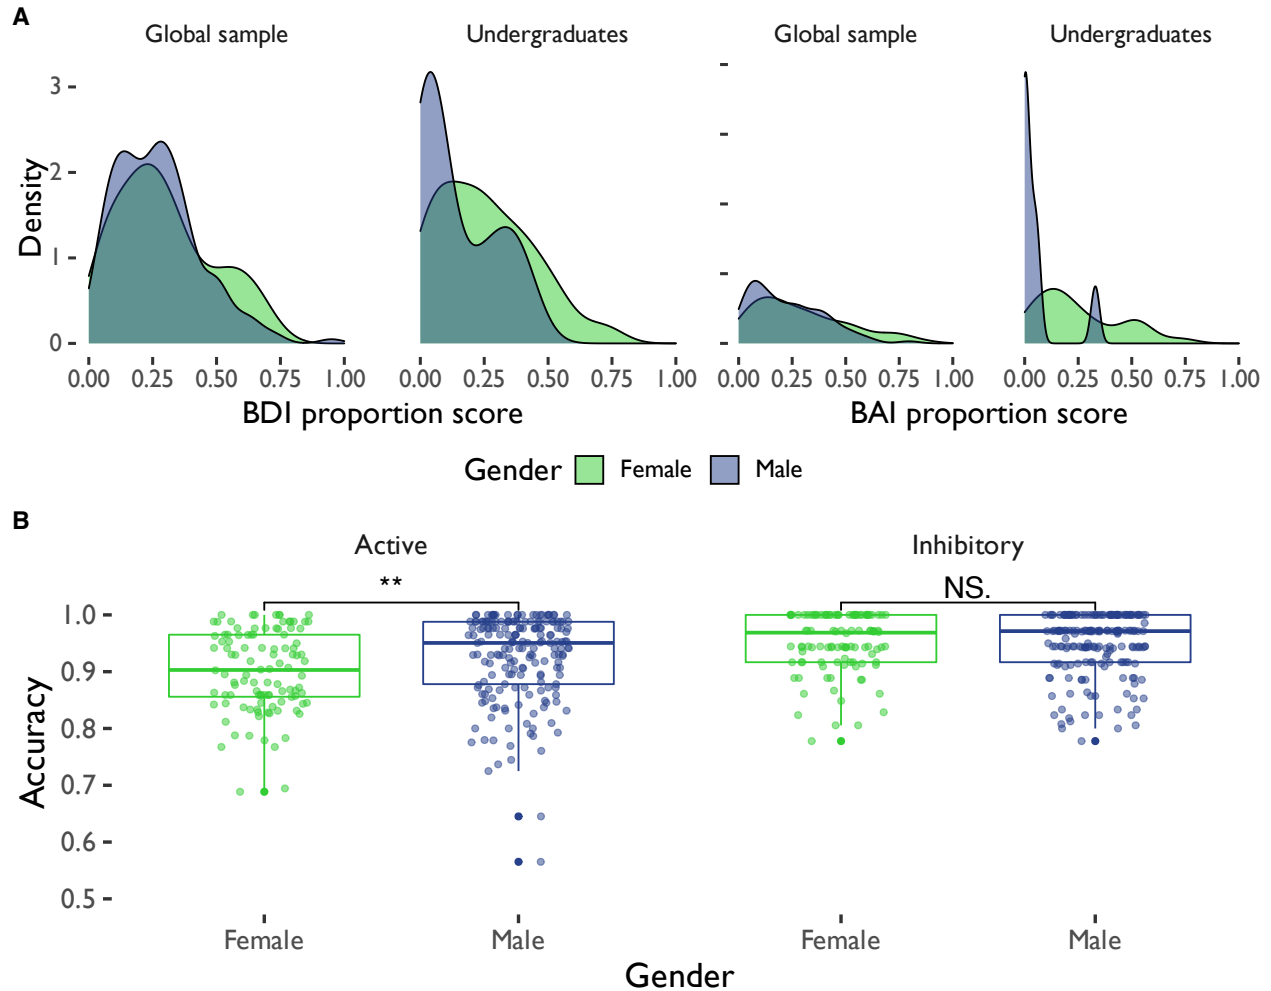

**Figure 5**

(A) Distribution of anxiety (BAI) and depressive symptom (BDI) scores by gender and sample. (B) Accuracy by gender on active and inhibitory reward-seeking, and moderation of the relationship between accuracy and anxiety (BAI) scores by gender. Proportion scores are scores divided by total possible score. BAI = Beck Anxiety Inventory, BDI = Beck Depression Inventory.

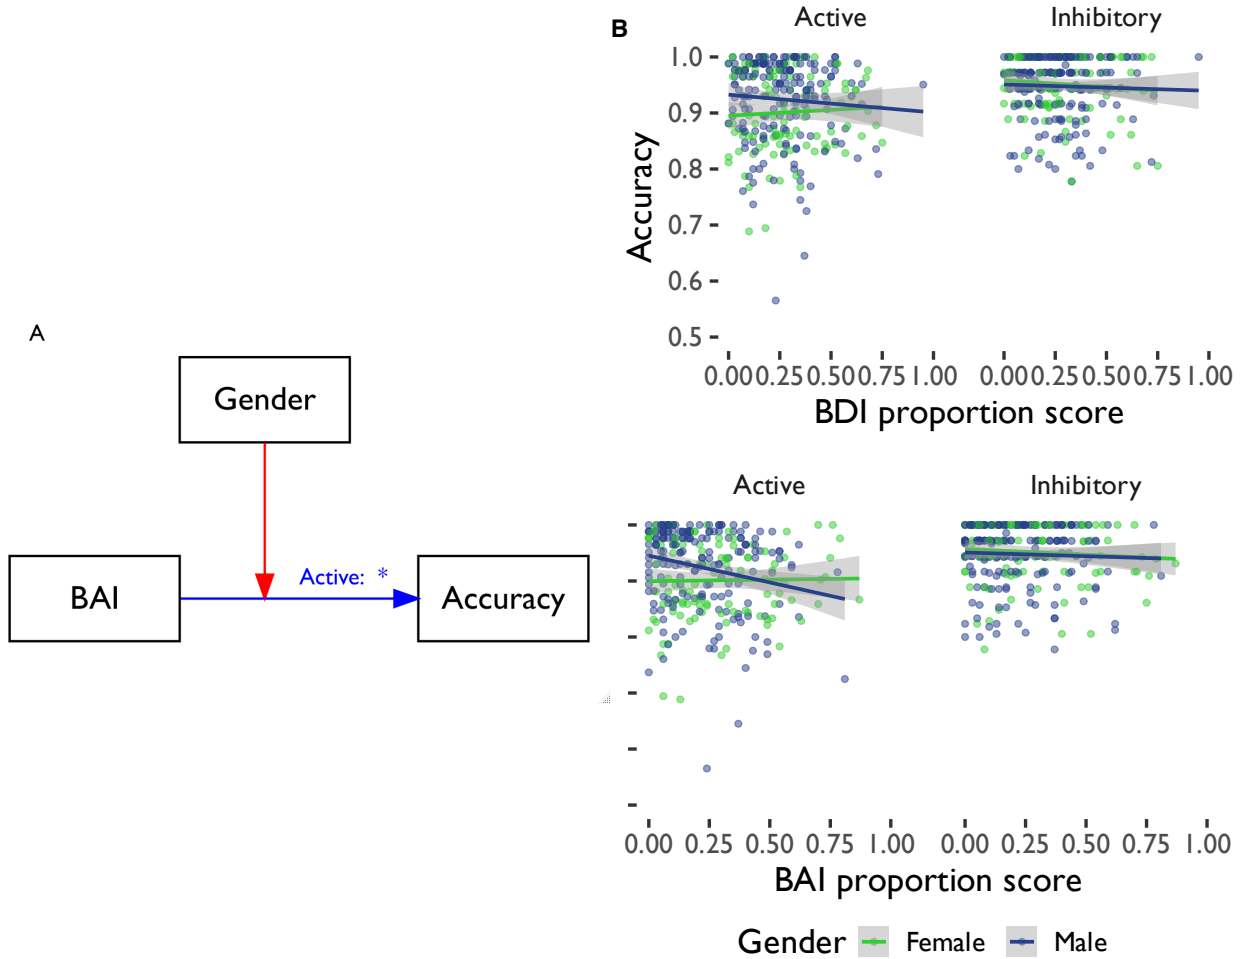

**Figure 6**

(A) Moderation of the relationship between accuracy and anxiety (BAI) proportion scores by gender on active and inhibitory reward-seeking. Anxiety symptoms (BAI proportion scores) were significantly associated with active reward-seeking accuracy. (B) Accuracy by gender on active and inhibitory reward-seeking. BAI = Beck Anxiety Inventory. Proportion scores are scores divided by total possible score.



**Active Reward-seeking**

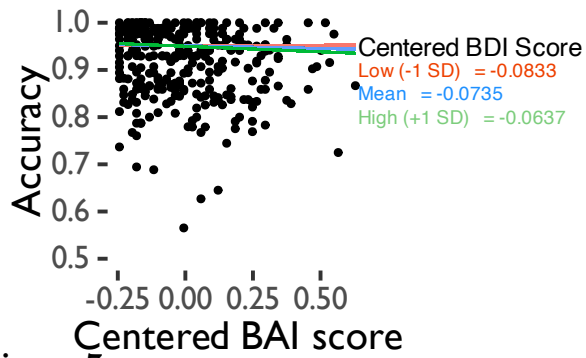

**Inhibitory Reward-seeking**

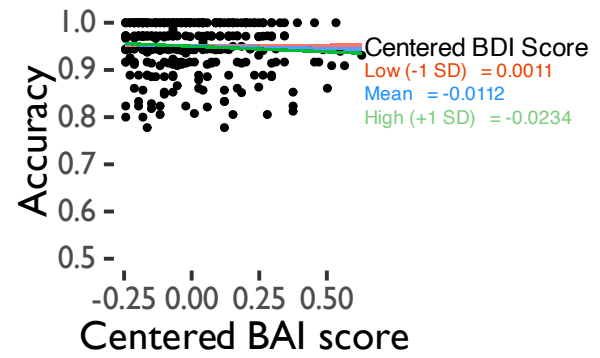

**Figure 7**

*Interactive regression analysis output for active and inhibitory reward-seeking. BAI = Beck Anxiety Inventory, BDI = Beck Depression Inventory. Numbers on right indicate coefficients for regression lines at each level of BDI score (centred 1 standard deviation below the mean, at the mean, and 1 standard deviation above the mean).*

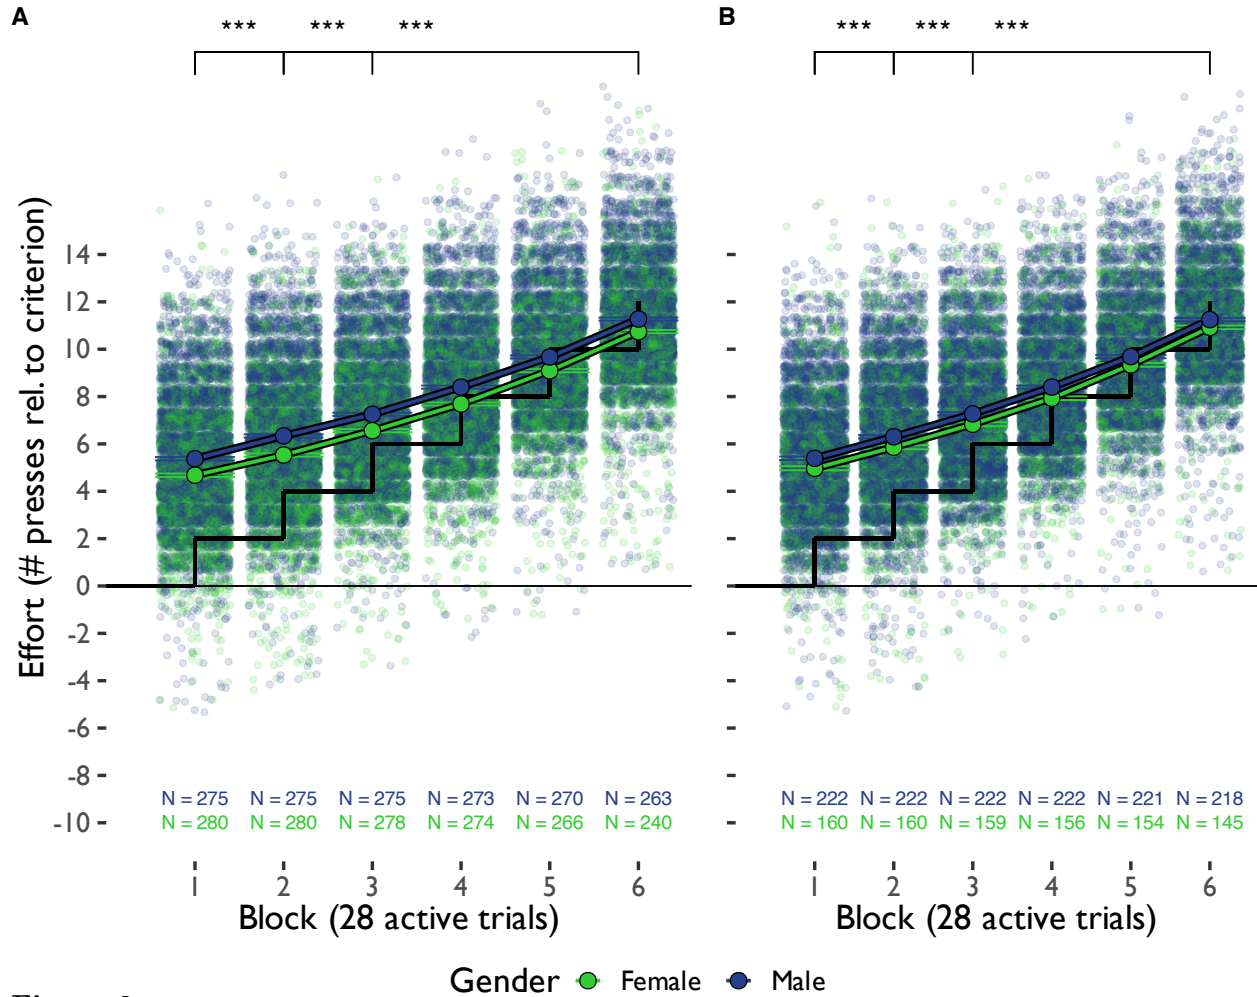

**Figure 8**

*Effort deployment across active avoidance (A) and reward-seeking (B) trials relative to the criterion effort deployment required to avoid an aversive outcome or obtain reward (black line). Each point represents one trial. N values represent number of participants of each gender who completed the task during that block of trials.*

Time →

## A. Avoidance

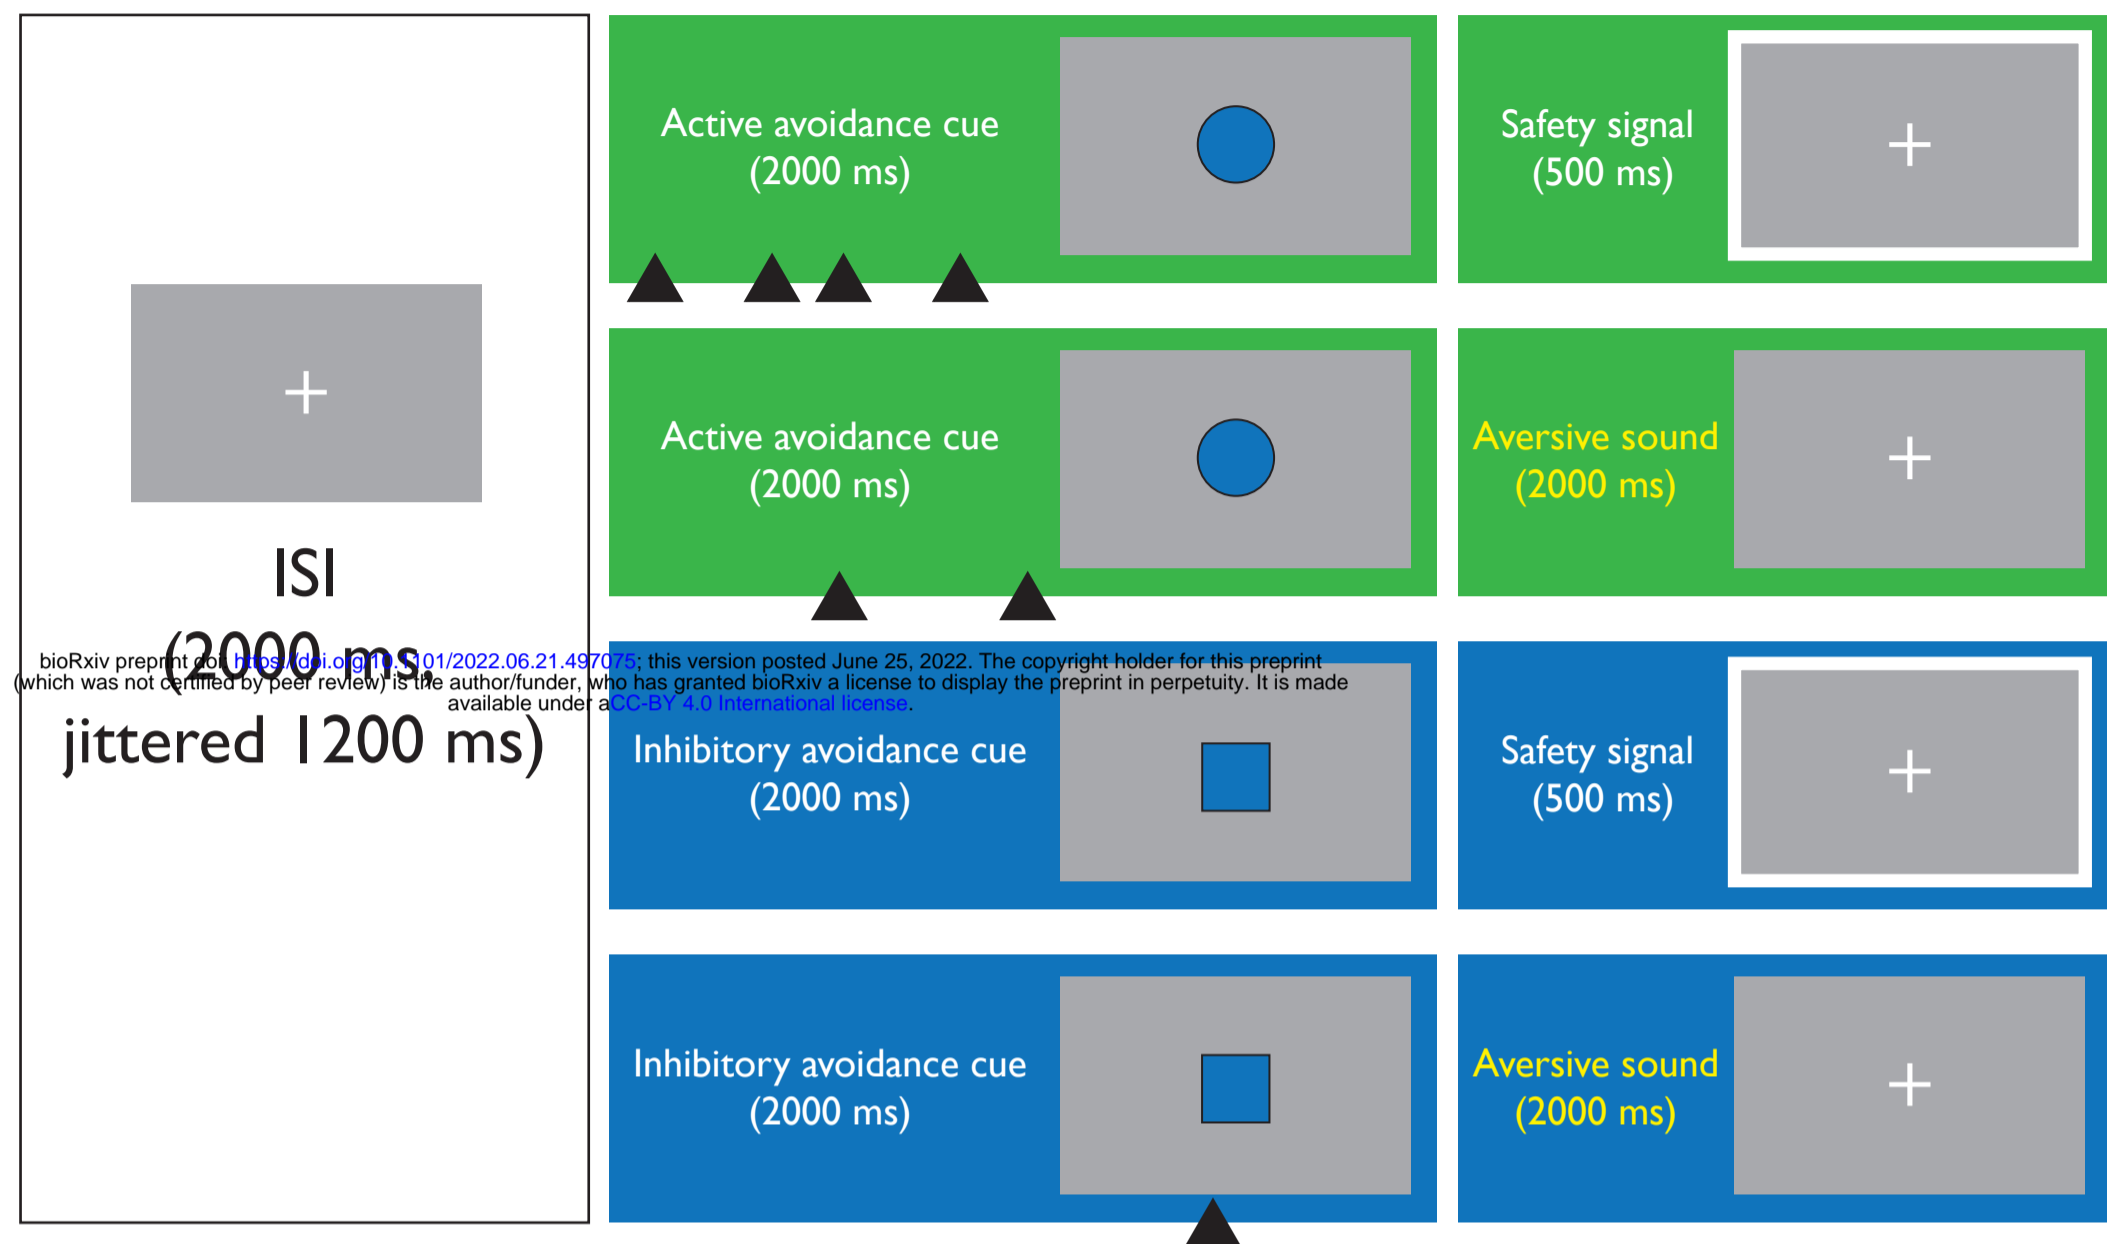

## B. Reward-seeking

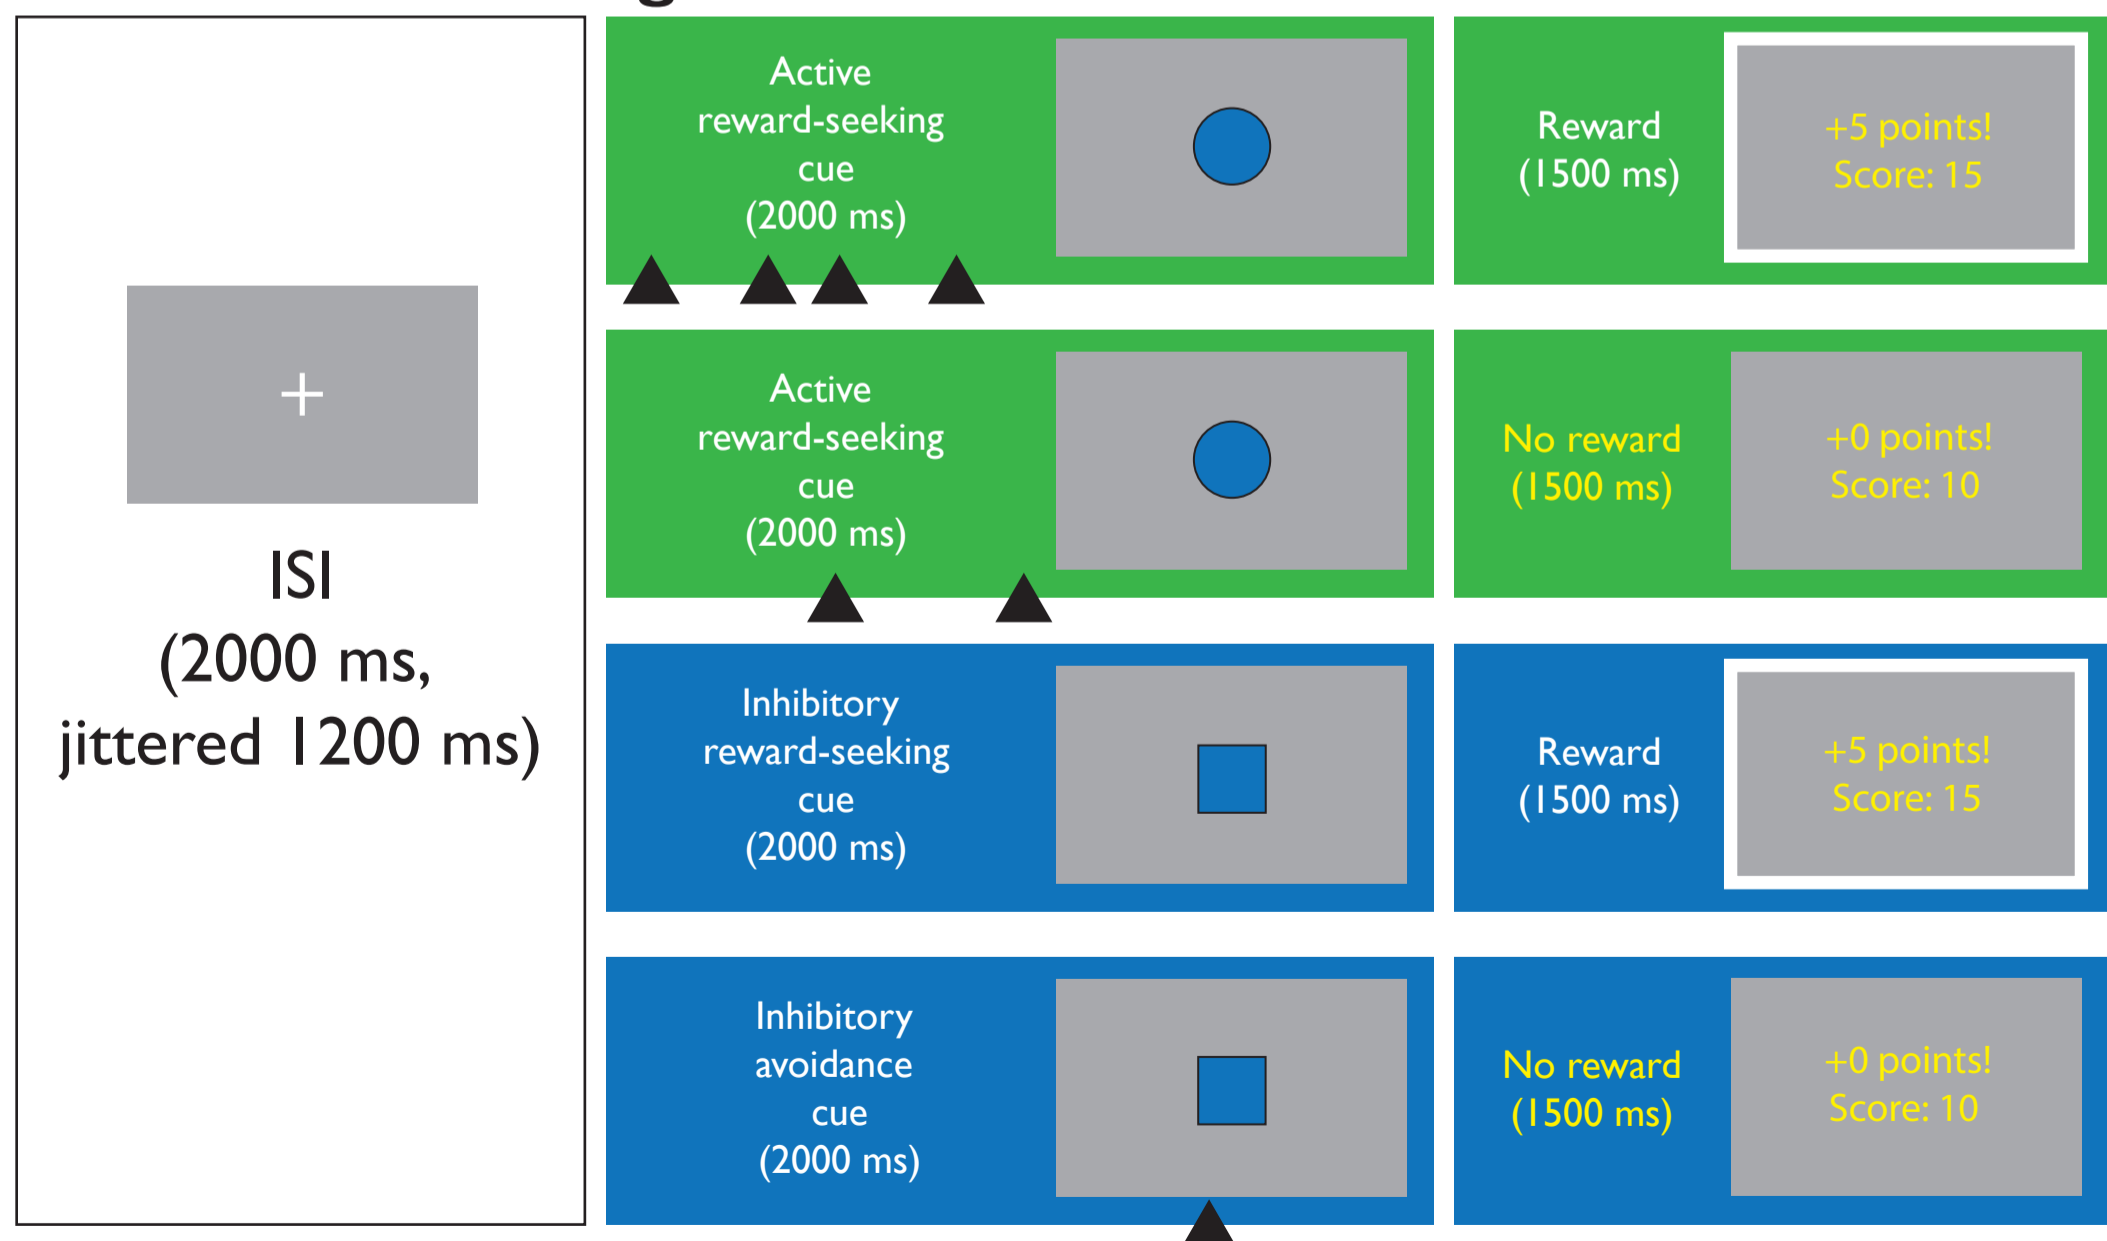

▲ = I key press

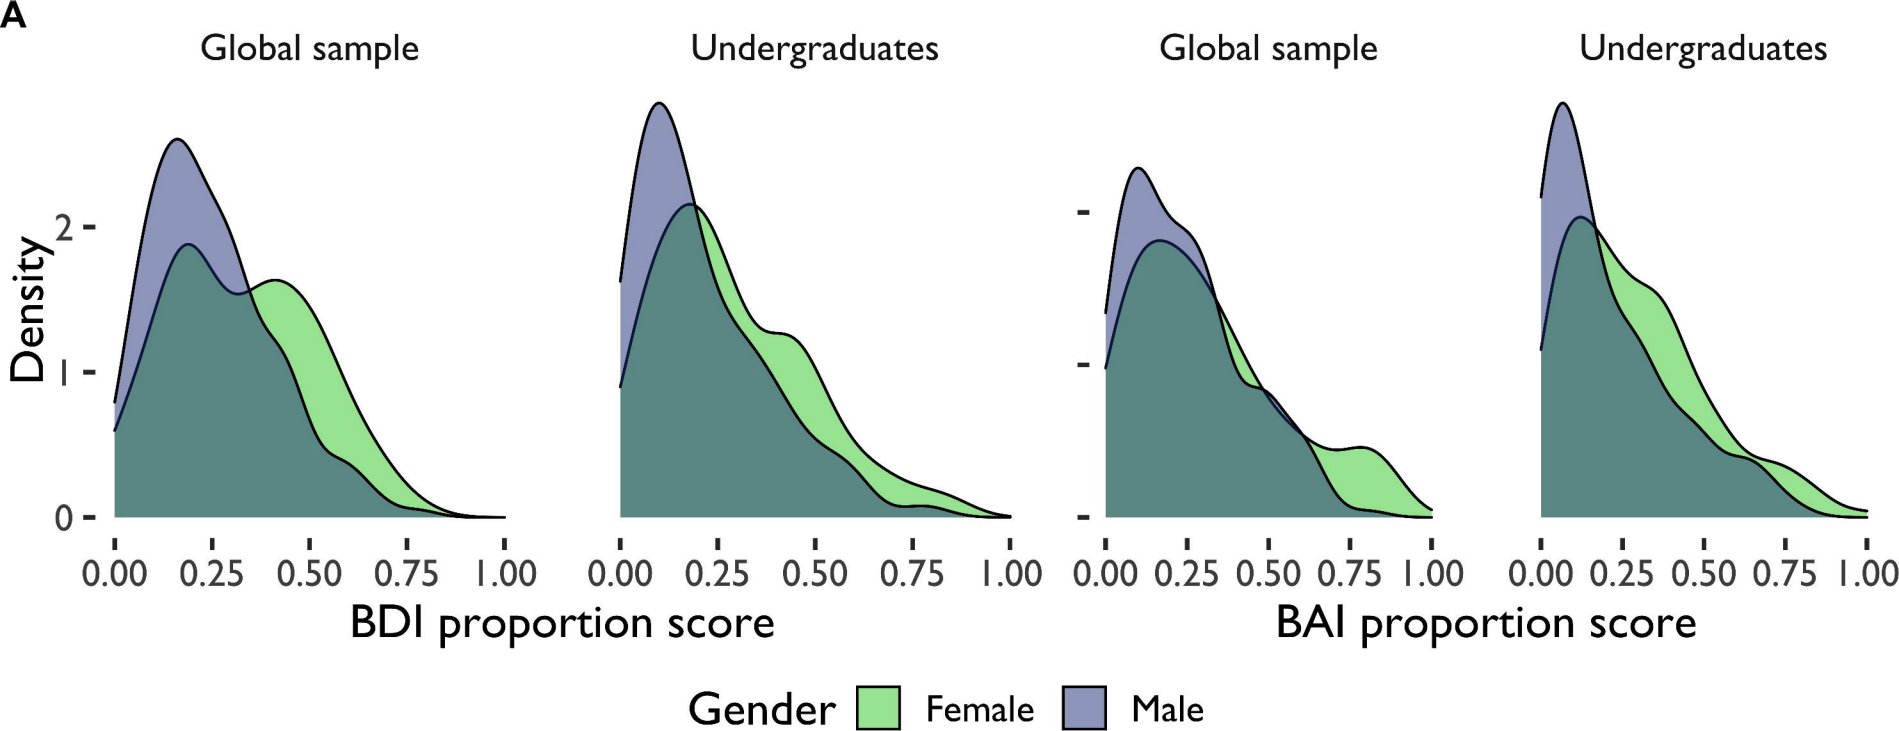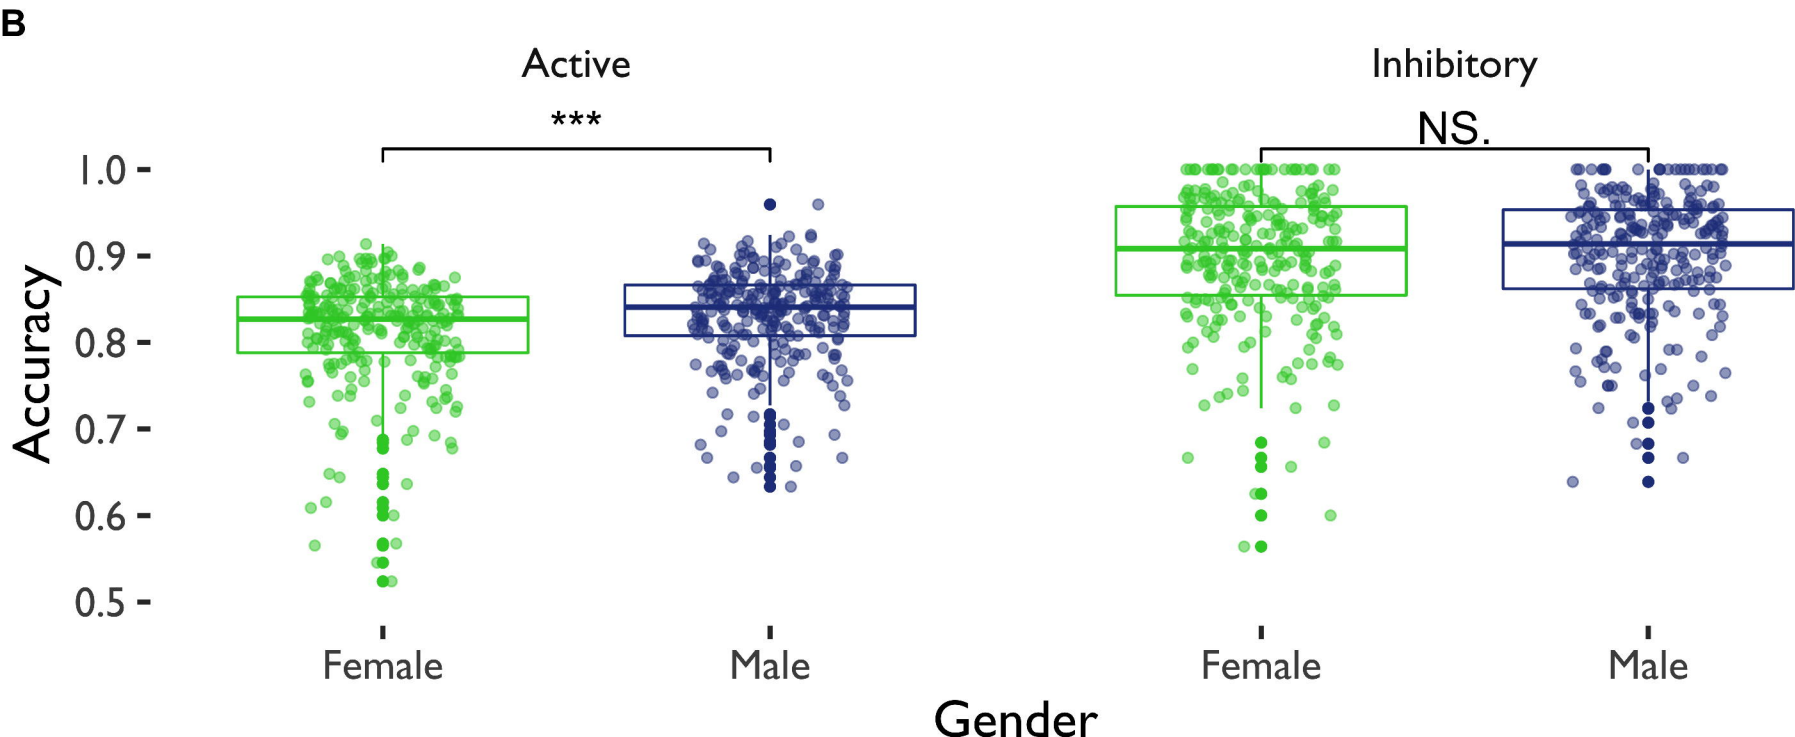

A

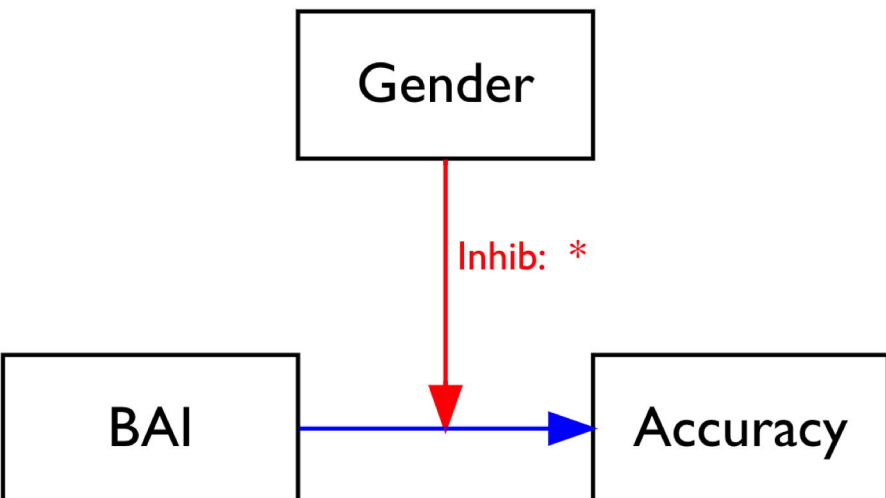

B

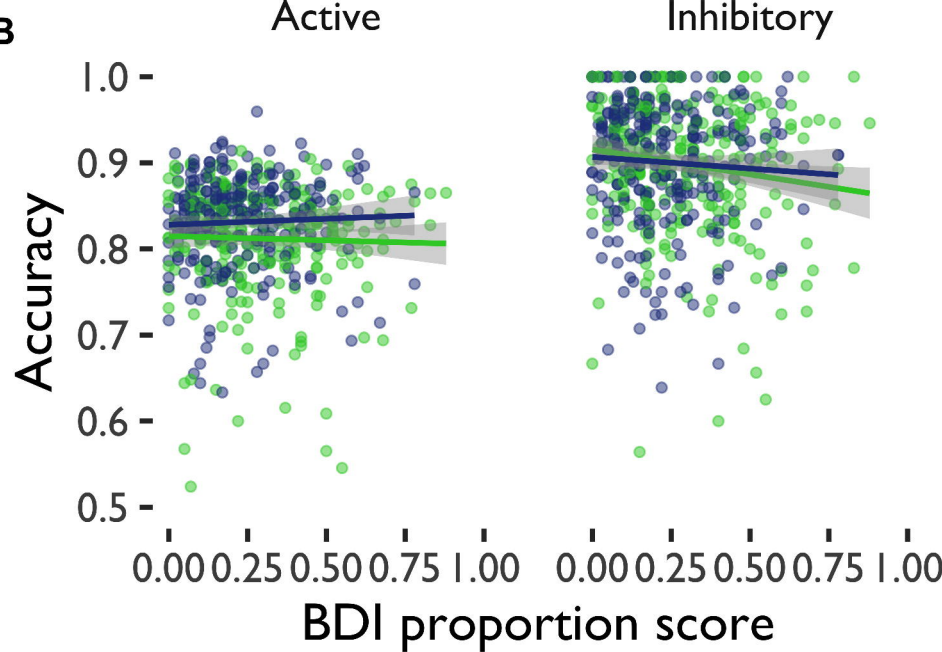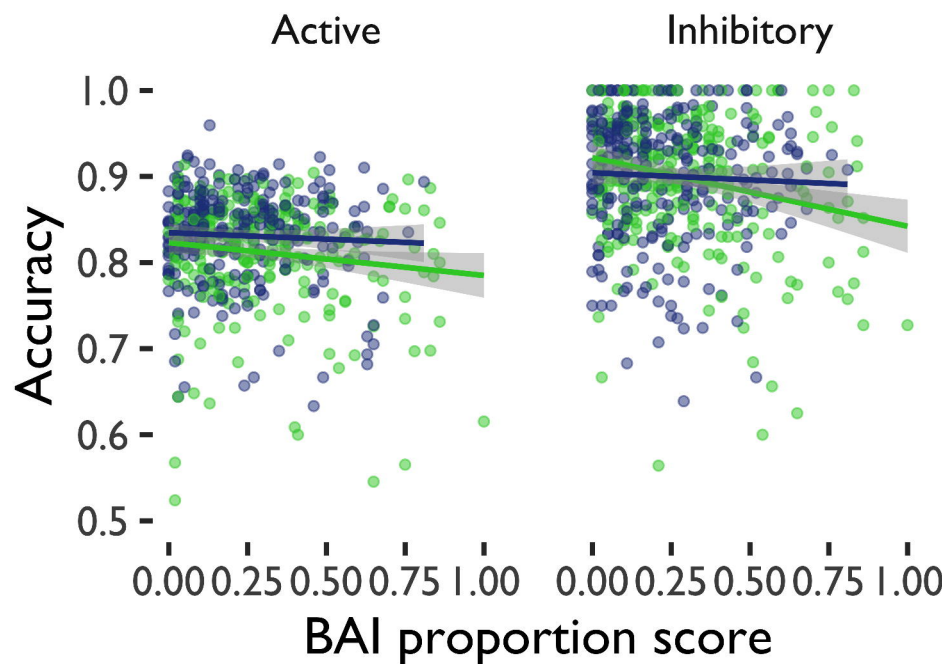

Gender — Female — Male

## Active Avoidance

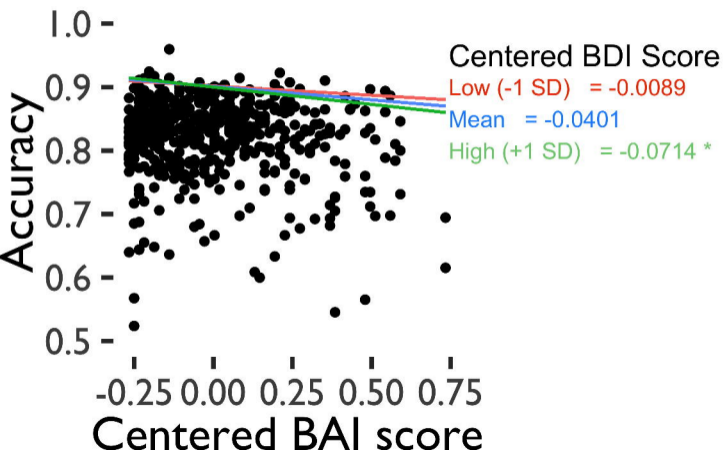

## Inhibitory Avoidance

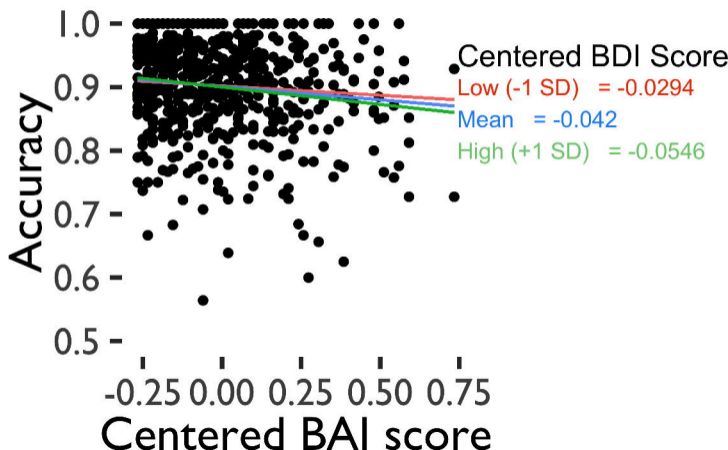

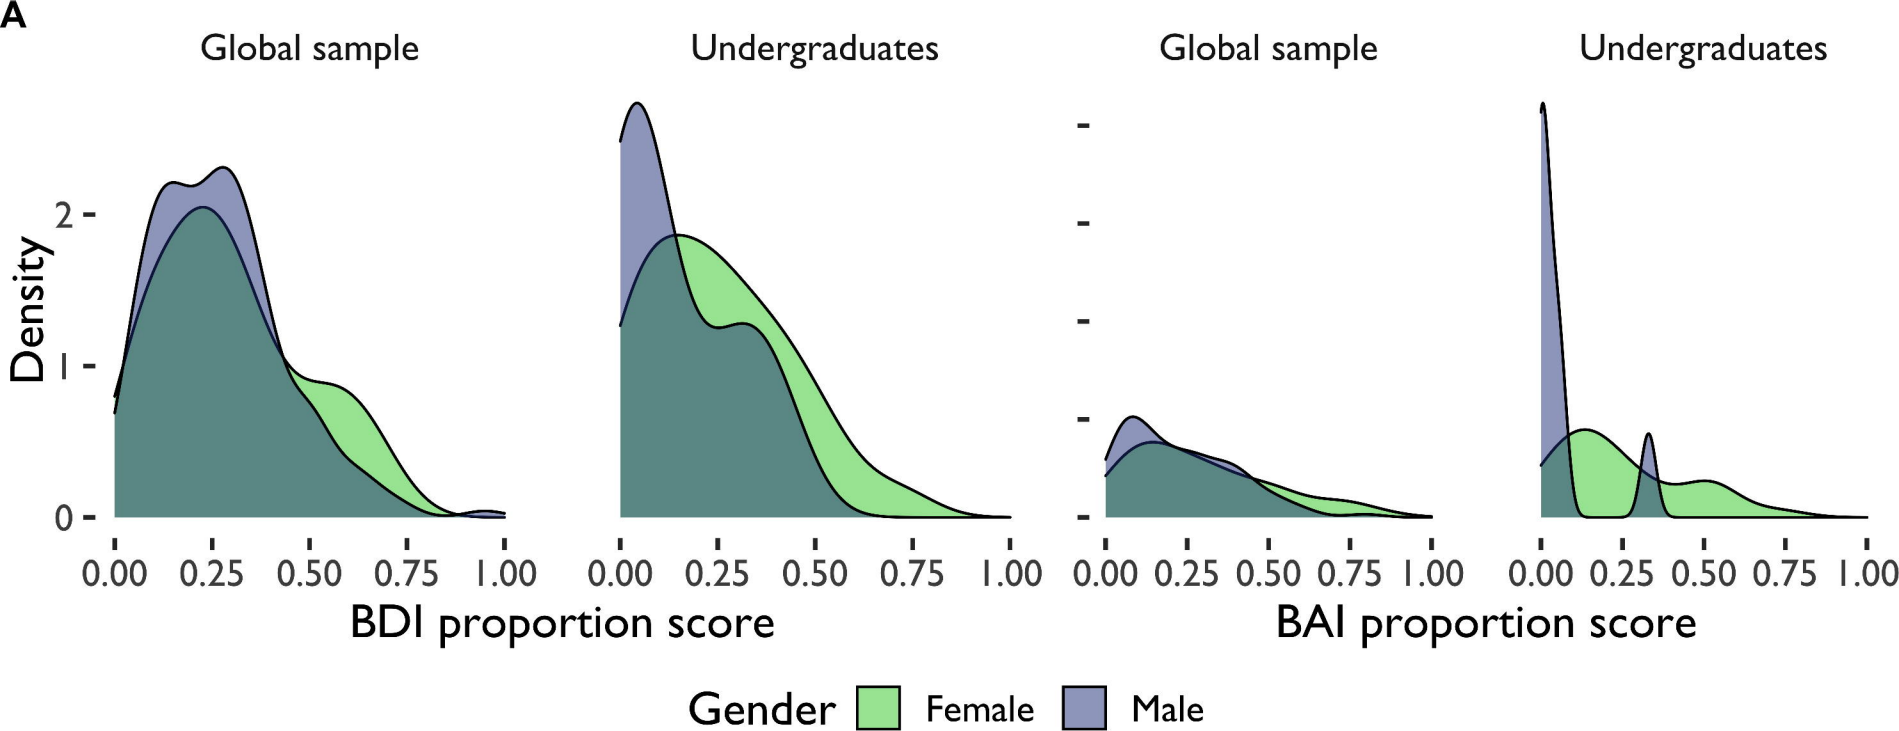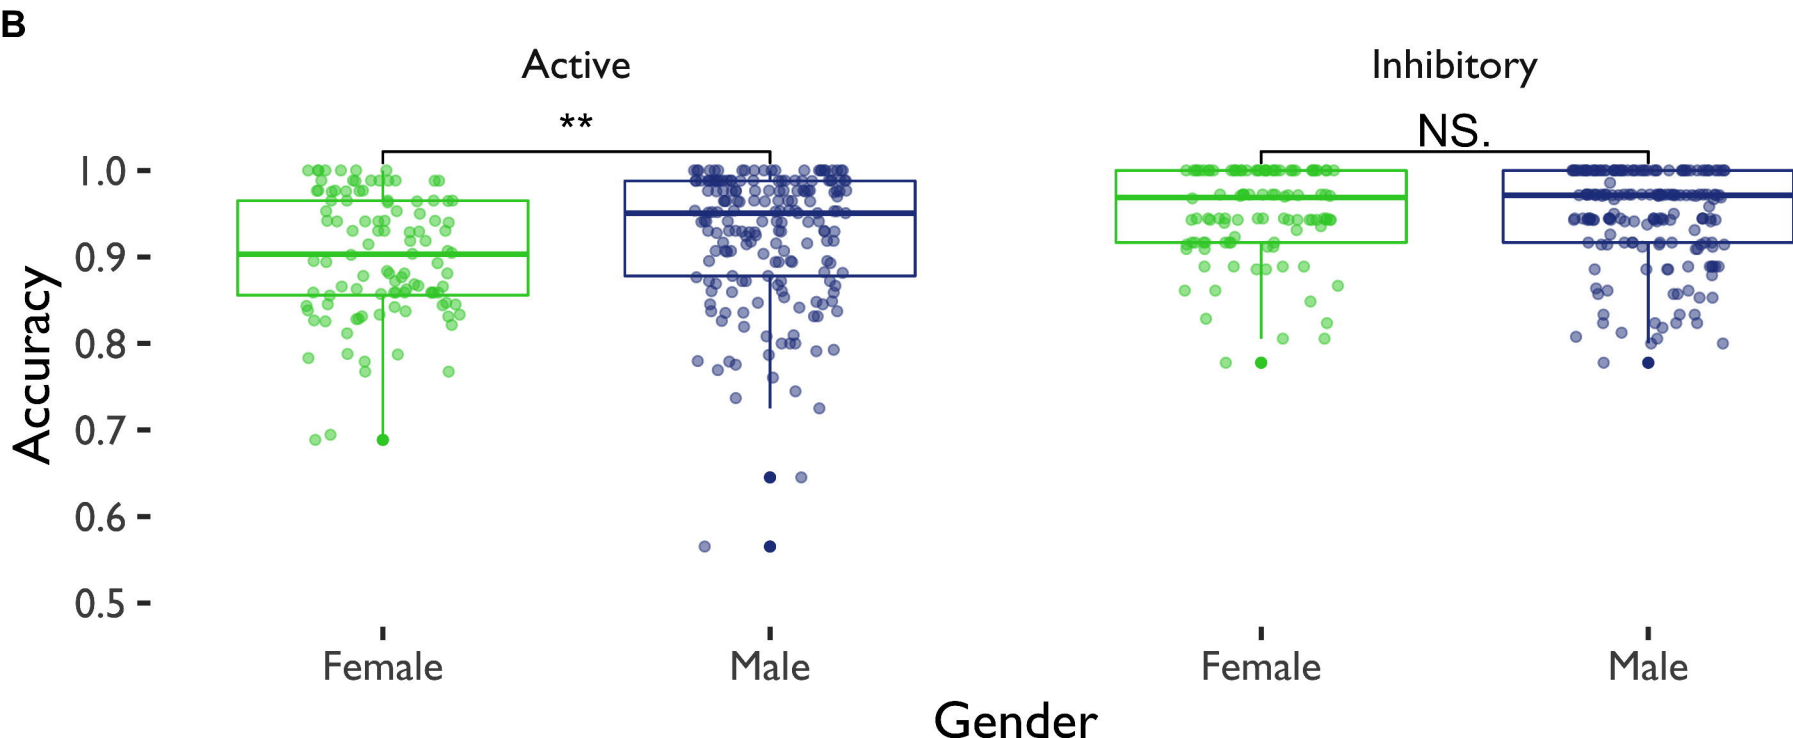

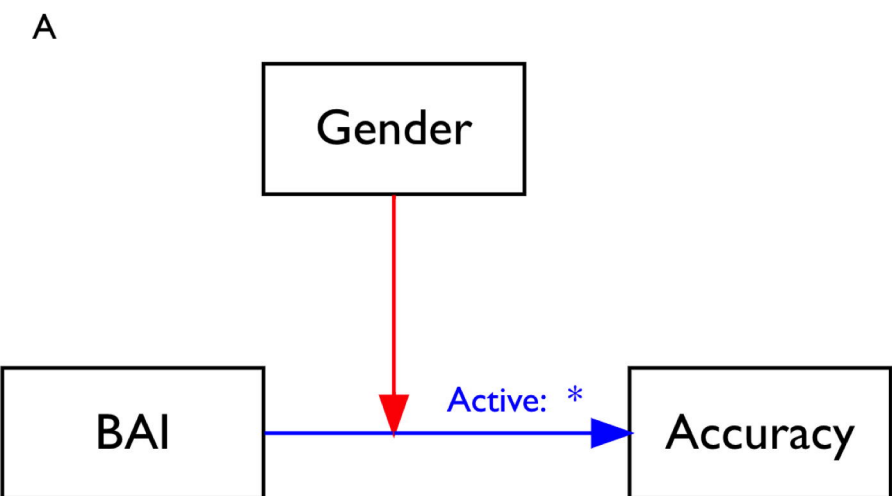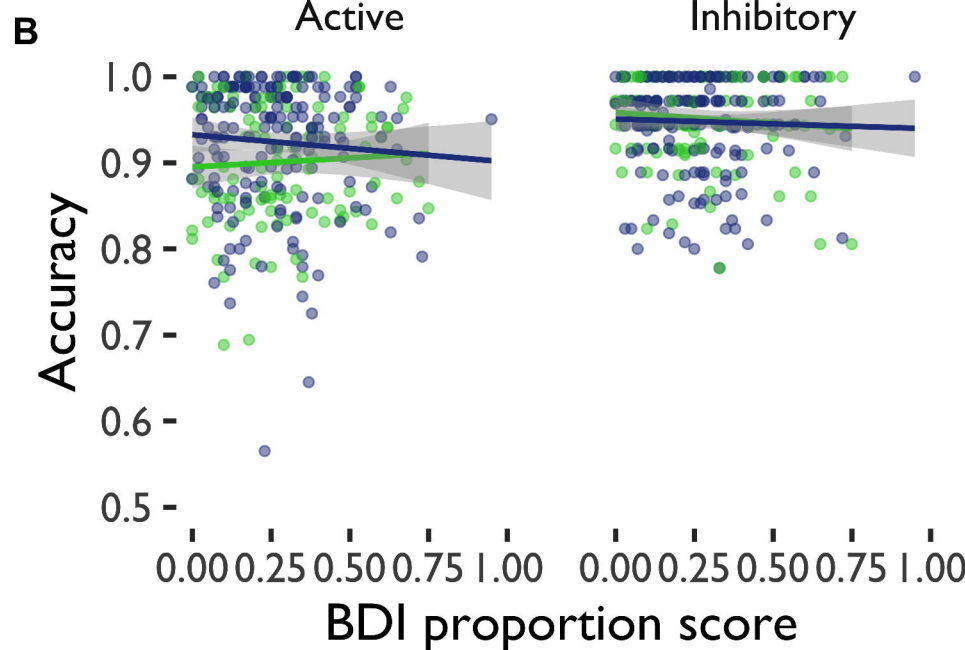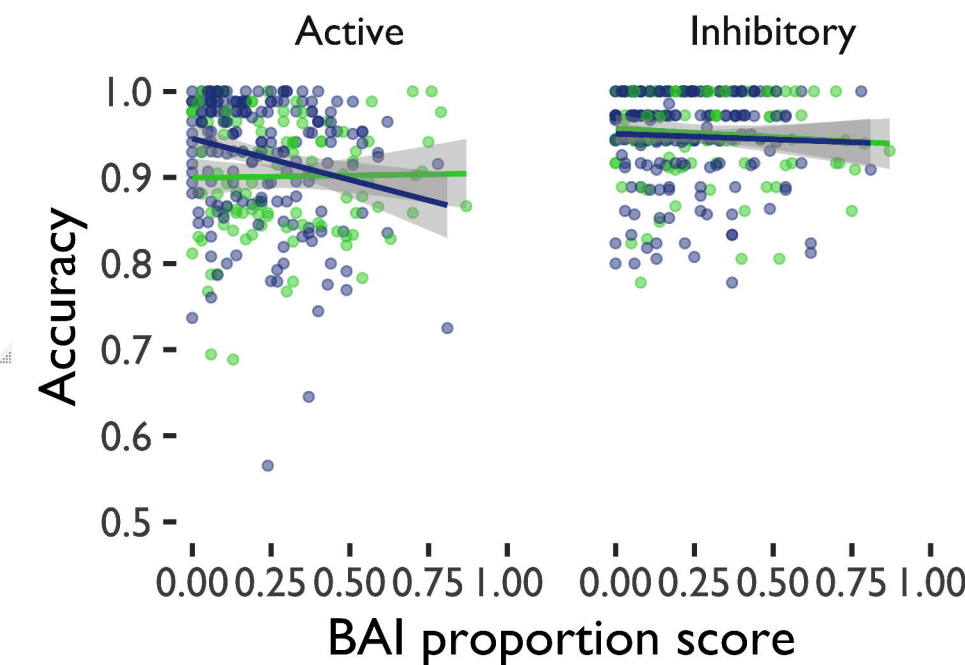

Gender — Female — Male



## Active Reward-seeking

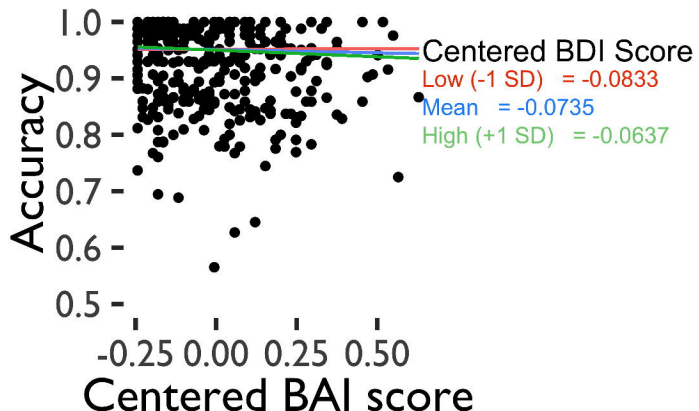

## Inhibitory Reward-seeking

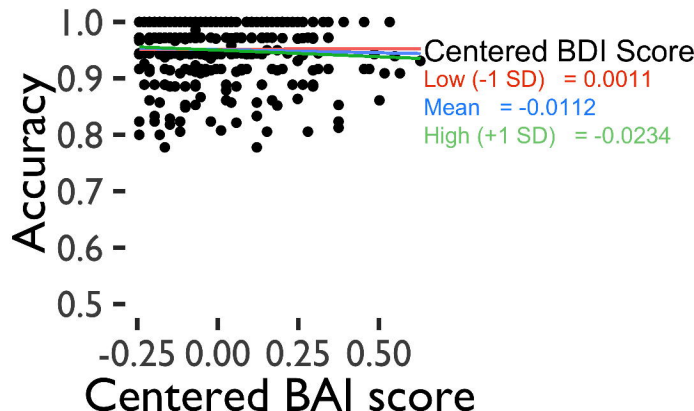

**A**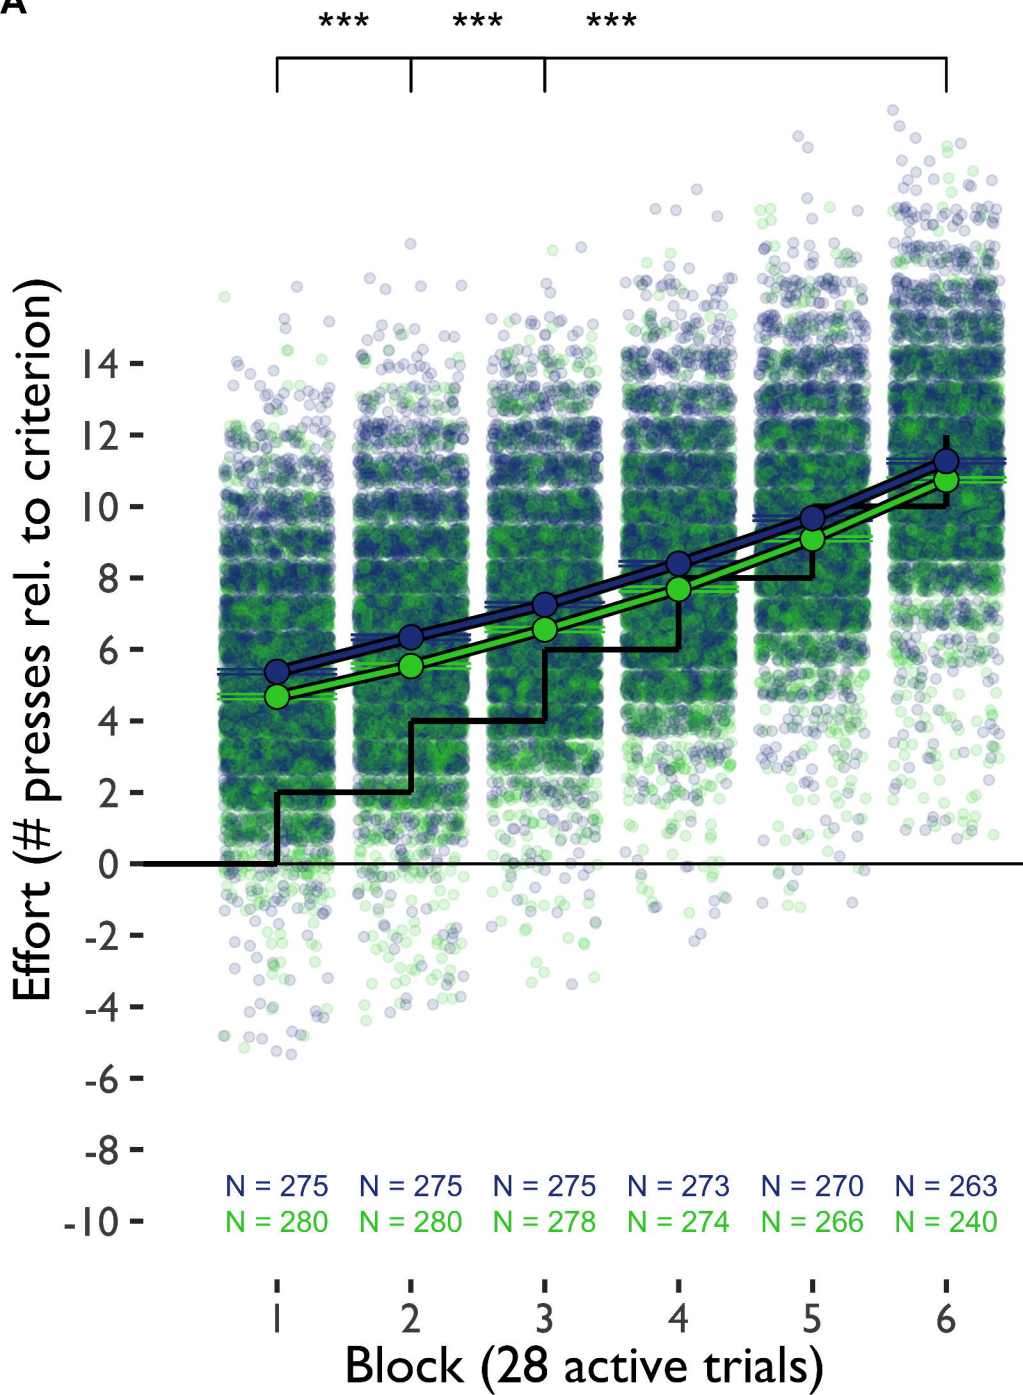**B**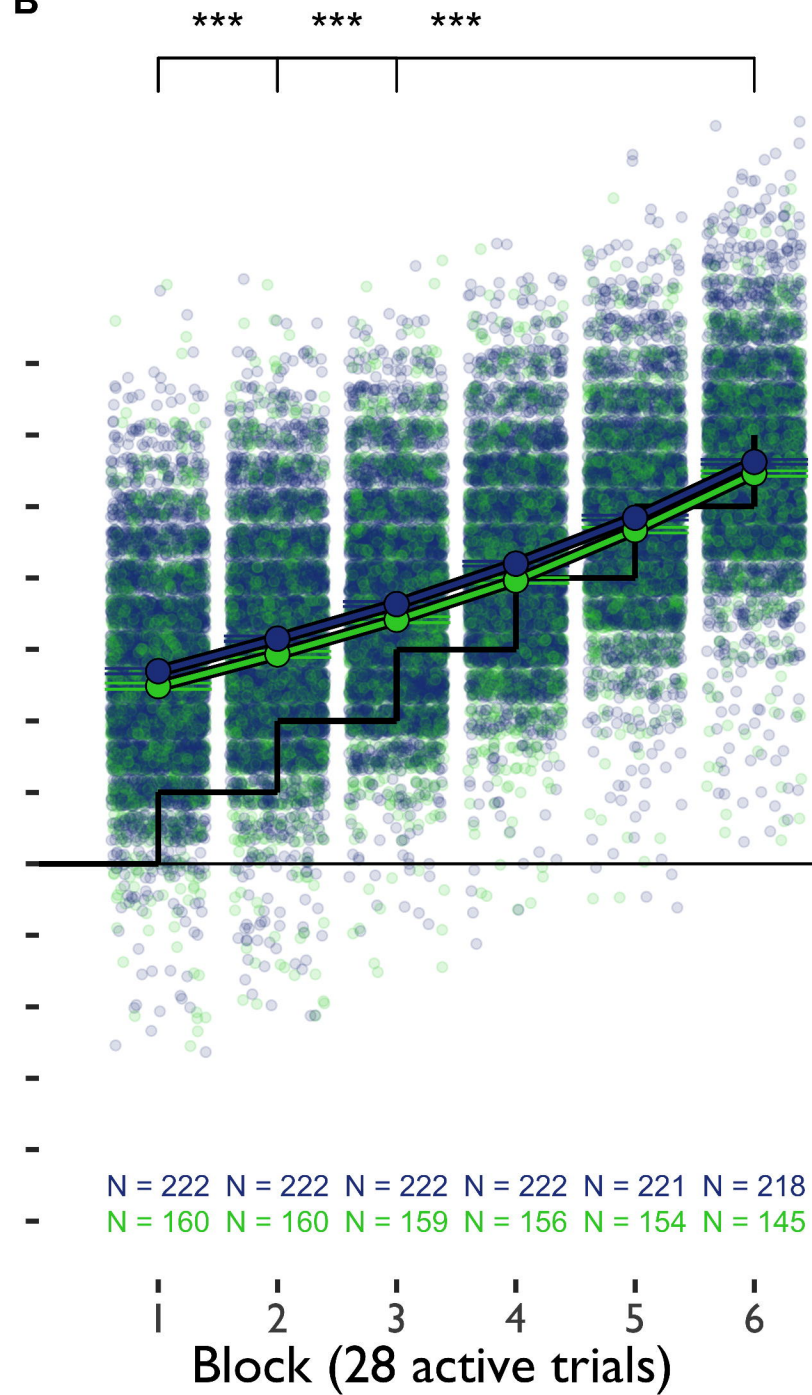

Source: http://biorxiv.org/content/10.1101/2022.06.21.497075v1.full.pdf
