1 **Gender impacts the relationship between mood disorder symptoms and effortful**  
2 **avoidance performance**

3 Brandon J. Forys<sup>1</sup>, Ryan J. Tomm<sup>1</sup>, Dayana Stamboliyska<sup>1</sup>, Alex R. Terpstra<sup>1</sup>, Luke  
4 Clark<sup>1, 2</sup>, Trisha Chakrabarty<sup>2, 3</sup>, Stan B. Floresco<sup>1, 2</sup>, and Rebecca M. Todd<sup>1, 2</sup>

5 <sup>1</sup>Department of Psychology, University of British Columbia, Vancouver, BC, Canada

6 <sup>2</sup>Djavad Mowafaghian Centre for Brain Health, University of British Columbia, Vancouver,  
7 BC, Canada

8 <sup>3</sup>Department of Psychiatry, University of British Columbia, Vancouver, BC, Canada

**Author Note**

9

10

11           The authors declare no competing financial interests. We would like to acknowledge  
12 Alan Kingstone for his instrumental feedback on this project, Veronica Dudarev for her  
13 advice on statistical analyses, as well as the contributions of Aanandi Sidarth to designing  
14 visual stimuli and Ian Daly to designing sounds stimuli for these studies. This research was  
15 supported by a Natural Sciences and Engineering Research Council of Canada (NSERC)  
16 grant (#F19-05182) to R. M. Todd and the UBC Djavad Mowafaghian Centre for Brain  
17 Health Innovation Fund Kickstart Research Grant (#F19-05932), as well as an NSERC  
18 Canada Graduate Scholarship - Master's (CGS M) award to B.J. Forys and a Michael Smith  
19 Foundation for Health Research Scholar Award to R.M. Todd.

20           The authors made the following contributions. Brandon J. Forys: Conceptualization,  
21 Investigation, Methodology, Writing - Original Draft Preparation, Writing - Review &  
22 Editing; Ryan J. Tomm: Conceptualization, Methodology, Writing - Review & Editing;  
23 Dayana Stamboliyska: Conceptualization, Investigation, Methodology, Writing - Review &  
24 Editing; Alex R. Terpstra: Conceptualization, Writing - Review & Editing; Luke Clark:  
25 Conceptualization, Funding acquisition, Writing - Review & Editing; Trisha Chakrabarty:  
26 Conceptualization, Funding acquisition, Writing - Review & Editing; Stan B. Floresco:  
27 Conceptualization, Funding acquisition, Writing - Review & Editing; Rebecca M. Todd:  
28 Conceptualization, Funding acquisition, Methodology, Project Administration, Resources,  
29 Supervision, Writing - Review & Editing.

30           Correspondence concerning this article should be addressed to Brandon J. Forys, 2136  
31 West Mall, Vancouver, BC Canada V6T 1Z4. E-mail: brandon.forys@psych.ubc.ca

**Abstract**

32

33 We must often decide how much effort to exert or withhold to avoid undesirable outcomes  
34 or obtain rewards. In depression and anxiety, levels of avoidance can be excessive and  
35 reward-seeking may be reduced. Yet outstanding questions remain about the links between  
36 motivated action/inhibition and anxiety and depression levels, and whether they differ  
37 between men and women. Here we examined the relationship between anxiety and  
38 depression scores, and performance on effortful active and inhibitory avoidance (Study 1)  
39 and reward seeking (Study 2) in humans. Undergraduates and paid online workers ( $N_{Avoid} =$   
40  $545$ ,  $N_{Reward} = 310$ ;  $N_{Female} = 368$ ,  $N_{Male} = 450$ ,  $M_{Age} = 22.58$ ,  $Range_{Age} = 17-62$ ) were  
41 assessed on the Beck Depression Inventory II (BDI) and the Beck Anxiety Inventory (BAI)  
42 and performed an instructed online avoidance or reward-seeking task. Participants had to  
43 make multiple presses on active trials and withhold presses on inhibitory trials to avoid an  
44 unpleasant sound (Study 1) or obtain points towards a monetary reward (Study 2). Overall,  
45 men deployed more effort than women in both avoidance and reward-seeking, and anxiety  
46 scores were negatively associated with active reward-seeking performance based on sensitivity  
47 scores. Gender interacted with anxiety scores and inhibitory avoidance performance, such  
48 that women with higher anxiety showed worse avoidance performance. Our results illuminate  
49 effects of gender in the relationship between anxiety and depression levels and the motivation  
50 to actively and effortfully respond to obtain positive and avoid negative outcomes.

51

*Keywords:* avoidance, reward, effort, depression, anxiety

52

Word count: 8582

53 **Gender impacts the relationship between mood disorder symptoms and effortful**  
54 **avoidance performance**

55 **Significance statement**

56 We must often take or withhold effortful action to avoid unpleasant outcomes or  
57 obtain rewards. Depression and anxiety can impact these behaviours' effectiveness, but the  
58 roles of avoidance in depression and reward-seeking in anxiety are not fully understood.  
59 Gender differences in avoidance and reward-seeking have also not been examined. We  
60 present a task in which community participants with a range of anxiety and depression levels  
61 made or withheld button presses to avoid hearing an unpleasant sound or obtain a reward.  
62 Men deployed more effort than women in avoidance, and women with higher anxiety scores  
63 had lower avoidance performance than men. We illuminate gender differences in how  
64 depressive and anxiety scores impact our ability to avoid threats and obtain rewards.

65 **Introduction**

66 **Avoidance and reward-seeking behaviours**

67 Living organisms are motivated to avoid potential threats or to acquire rewards  
68 respectively. Often achieving these goals requires action, but it can also require refraining  
69 from action. For example, we may take action to remove a threat's potential harm through  
70 active avoidance, or we may decide that withholding action is the best way to let the threat  
71 pass by, as in inhibitory avoidance (Krypotos, Effting, Kindt, and Beckers, 2015; LeDoux,  
72 Moscarello, Sears, and Campese, 2017). Alternatively, in a situation that offers the possibility  
73 of reward, we may take action to approach the reward through active reward-seeking or,  
74 instead, inhibit pre-potent reward seeking to wait for a larger reward (Capuzzo and Floresco,  
75 2020; Cools, 2008). Research suggests that the expression of similar behavioral actions  
76 (including inhibition) is dependent on the motivational context (aversive vs. appetitive),  
77 which influences the likelihood of selecting a specific action in a specific motivational context

78 (Wang and Delgado, 2021). However, in neuropsychiatric research, depressive disorders are  
79 often studied with regard to reward-seeking contexts, and anxiety disorders with regard to  
80 avoidance contexts, with little emphasis on the other motivational context. Symptoms of  
81 anxiety and depression have been associated with avoidance, typically operationalized via  
82 active avoidance and via questionnaires, as threats are overestimated (Bishop and Gagne,  
83 2018; Browning, Behrens, Jocham, O'Reilly, and Bishop, 2015; Cléry-Melin, Schmidt,  
84 Lafargue, Baup, Fossati, and Pessiglione, 2011; Mkrtchian, Aylward, Dayan, Roiser, and  
85 Robinson, 2017; Ottenbreit, Dobson, and Quigley, 2014). In depression, reward-seeking may  
86 also be impaired due to a lack of motivation to obtain rewards (Alloy, Olino, Freed, and  
87 Nusslock, 2016; Bishop and Gagne, 2018). Past research has established the importance of  
88 avoidance and reward-seeking behaviours in helping us navigate our environment and stay  
89 safe (Krypotos, Effting, Kindt, and Beckers, 2015; LeDoux, Moscarello, Sears, and Campese,  
90 2017). However, active vs. inhibitory subtypes of these behaviours have not typically been  
91 distinguished – especially through objective measures of observable behavior.

92         Gender - as a culturally defined construct - may also be an important variable in this  
93 relationship. For example, gender differences have been identified in the presentation and  
94 incidence of mood and anxiety disorders, such that women have higher rates of depression  
95 and present more often with depression than men (Altemus, Sarvaiya, and Neill Epperson,  
96 2014; Kessler, 2006; Parker and Brotchie, 2010) and have rates of anxiety disorders that are  
97 twice as high as those of men (McLean, Asnaani, Litz, and Hofmann, 2011; Pittig, Treanor,  
98 LeBeau, and Craske, 2018). However, we do not know how these gender differences manifest  
99 themselves in avoidance or reward-seeking behaviours. Although mood and anxiety disorders  
100 are often comorbid, they also manifest with distinct symptoms and courses that would  
101 require distinct strategies to treat in a clinical context (Goldstein-Piekarski, Williams, and  
102 Humphreys, 2016; McLean, Asnaani, Litz, and Hofmann, 2011). In the present study, we ask  
103 how indices of anxiety and depression levels impact active vs. inhibitory avoidance and  
104 reward-seeking behaviours in a community population of young adults with a wide range of

105 depressive and anxiety scores ranging from minimal to severe.

106 **The role of mood disorder symptoms and gender differences in avoidance and**  
107 **reward-seeking**

108 It has been proposed that mood and anxiety disorder symptoms shift the perceived  
109 value and costs of avoidance and reward-seeking in sub-optimal ways. The Altered  
110 Computations Underlying Decision Making (ACDM) framework (Bishop and Gagne, 2018)  
111 proposes that anxiety is linked to underestimation of the effort cost in avoiding an aversive  
112 outcome and that depression is linked to overestimation of the effort cost in obtaining a  
113 reward. These effort costs interact with the perceived value of avoidance or reward-seeking  
114 to inform one's decision on whether or not to engage in the behaviour. Past experimental  
115 work has also identified impairments in physical effort deployment for reward in populations  
116 with depression (Pessiglione, Vinckier, Bouret, Daunizeau, and Le Bouc, 2018; Treadway,  
117 Buckholtz, Schwartzman, Lambert, and Zald, 2009; see Culbreth, Moran, and Barch, 2018  
118 for a review) and anxiety (Wang and Delgado, 2021). However, work linking mood and  
119 anxiety disorders to impairments in adaptive avoidance and reward-seeking often focuses on  
120 these avoidance and reward-seeking behaviours as unitary processes. As such, we still do not  
121 know how shifts in perceived effort costs linked to mood and anxiety disorders manifest  
122 themselves in active or inhibitory avoidance or reward-seeking.

123 To better understand the degree to which depressive and anxiety scores contribute to  
124 active and inhibitory forms of avoidance or reward-seeking a rigorous assessment of effort  
125 deployment in these behaviors is needed. People with Major Depressive Disorder (MDD)  
126 show a reduction in selecting high-effort, high-reward options on effort-based decision  
127 making tasks. This behaviour is potentially symptomatic of a larger-scale motivational  
128 deficit (Pessiglione, Vinckier, Bouret, Daunizeau, and Le Bouc, 2018; Treadway, Bossaller,  
129 Shelton, and Zald, 2012; Treadway, Buckholtz, Schwartzman, Lambert, and Zald, 2009). If  
130 maladaptive effort deployment is a primary characteristic of mood and anxiety disorders,

131 then we might expect active avoidance and reward-seeking to be impaired more than  
132 inhibitory forms of these behaviours overall (Culbreth, Moran, and Barch, 2018). Anxiety,  
133 especially when co-occurring with high levels of depression, has also been shown to impair  
134 our sensitivity to rewards (Auerbach, Pagliaccio, Hubbard, Frosch, Kremens, Cosby, Jones,  
135 Siless, Lo, Henin, Hofmann, Gabrieli, Yendiki, Whitfield-Gabrieli, and Pizzagalli, 2022;  
136 Dillon, Rosso, Pechtel, Killgore, Rauch, and Pizzagalli, 2014); however, whether anxiety's  
137 impact on reward-seeking differs for active or inhibitory behaviours is not yet clear.

138           Additionally, individual differences in the presentation and severity of mood and  
139 anxiety disorders - beyond the mere presence or absence of the disorder - may manifest with  
140 different patterns of active vs. inhibitory behaviours depending on the motivational context.  
141 Among these patterns, gender differences are especially prominent. Women generally present  
142 with higher levels of depression (Parker and Brotchie, 2010) and experience depression  
143 comorbid with anxiety more often than men (Kessler, 2006; McLean, Asnaani, Litz, and  
144 Hofmann, 2011; Ottenbreit, Dobson, and Quigley, 2014). Thus, the impact of mood and  
145 anxiety disorders on our ability to avoid aversive outcomes and seek out rewarding outcomes  
146 may be linked to gender differences that affect the motivational deficits these disorders  
147 present. If gender differences - looking across a full range of depressive and anxiety scores  
148 captured on self-report scales (Beck, Steer, and Brown, 1996) - predict differences in  
149 performance in a gender-dependent manner, then our study may help elucidate how gender  
150 differences in depressive and anxiety scores translate to changes in real-life behaviour.

151           In order to bring our understanding of mood disorder symptoms into a framework  
152 that acknowledges differences in active vs. inhibitory avoidance and reward-seeking  
153 behaviours, we must consider both anxiety and depression in a framework that directly  
154 investigates their impact on these behaviours, and how depressive and anxiety symptoms  
155 might interact to impair effective avoidance and reward-seeking. While the relationships  
156 between anxiety and avoidance (Bishop and Gagne, 2018; Levita, Hoskin, and Champi, 2012;

157 Norbury, Robbins, and Seymour, 2018), and depression and reward-seeking (Alloy, Olin,  
158 Freed, and Nusslock, 2016; Rizvi, Pizzagalli, Sproule, and Kennedy, 2016; Treadway,  
159 Bossaller, Shelton, and Zald, 2012) are well established, those between anxiety and  
160 reward-seeking, as well as depression and avoidance, have yet to be fully characterized.

### 161 **An effortful avoidance and reward-seeking study**

162 Despite established gender differences in the prevalence and presentation of mood  
163 disorder symptoms (Kessler, 2006; Parker and Brotchie, 2010; Thompson and Bland, 2018),  
164 it is not known how the relationship between mood and anxiety disorder symptom levels,  
165 and avoidance and reward-seeking, differs by gender. Gender differences in motivational  
166 deficits may lead to unique patterns in active and inhibitory behaviours, but this has not  
167 been examined either. As such, in this work, we ask: 1) whether anxiety and depression  
168 symptoms predict accuracy and effort deployment in active/inhibitory avoidance  
169 vs. reward-seeking; and 2) whether there are gender differences in the relationship between  
170 mood disorder scores and accuracy. We predicted that anxiety scores would significantly  
171 predict participants' accuracy and the amount of effort they were able to deploy in avoidance  
172 behaviours (Bishop and Gagne, 2018) and that depression scores would significantly predict  
173 participants' accuracy and effort in reward-seeking behaviours (Bishop and Gagne, 2018).  
174 We also predicted that the relationship between mood disorder scores – especially depression  
175 scores – and task performance (accuracy and effort) would be differ by gender, such that  
176 women would have lower performance than men in the task given higher depression scores  
177 (Parker and Brotchie, 2010).

178 To address these questions, the present study examined both avoidance and  
179 reward-seeking, each with two community online samples - undergraduates and online  
180 workers - with a broad distribution of mood disorder scores. Both studies were  
181 reverse-translated with modification from a series of rodent studies investigating deficits in  
182 active and inhibitory avoidance and reward-seeking behaviours (Capuzzo and Floresco, 2020;



183 Piantadosi, Yeates, and Floresco, 2018). Our studies are the first to combine intermixed  
184 active and inhibitory avoidance (Levita, Hoskin, and Champi, 2012) or reward-seeking trials  
185 with increasing effort requirements throughout the task, requiring participants to switch  
186 between withholding physical effort on inhibitory trials and deploying increasing amounts of  
187 effort on active trials in each task. This design allows us to directly compare performance on  
188 active and inhibitory trials in the context of increasing effort demands. Increasing effort  
189 demands may also pull out differences in selecting between active vs. inhibitory strategies.

## 190 **Materials and Methods**

### 191 **Participants**

192 We powered each study to detect a moderate-sized main effect of  $d = 0.15$  obtained  
193 with a previous study of  $N = 217$  participants using the `fabs` R package (Biesanz, 2020),  
194 resulting in a target sample size of  $N = 549$ . Demographic information for all studies can be  
195 found in Table ???. For each study, we collected data from two samples: an undergraduate  
196 population and an online worker population. The study was approved by the University of  
197 British Columbia Behavioural Research Ethics Board (BREB) under certificate H20-01388.

### 198 **Study 1 (Avoidance)**

199 We recruited undergraduate participants at the University of British Columbia to  
200 participate online in our study. These participants received one percentage point towards  
201 their grade in a psychology course of their choosing for completing the study. Of these  
202 participants,  $N = 311$  finished the study, of which  $N = 39$  were excluded for not completing  
203 the pre-task survey, having below 50% accuracy on active or inhibitory avoidance trials,  
204 spending over 100 s on any given attention check, or not responding to all Beck Anxiety  
205 Inventory (BAI) questions. As such, data from  $N = 272$  participants was used in the data  
206 analysis.

207 Additionally, we recruited paid online workers from around the world ( $N = 310$ ) on

208 the Prolific online study platform (<https://www.prolific.co/>). These participants received  
209 GBP £8.07 for completing the study. Of these participants,  $N = 294$  finished the study, of  
210 which  $N = 22$  were excluded for not completing the pre-task survey, having below 50%  
211 accuracy on active or inhibitory avoidance trials, spending over 100 s on any given attention  
212 check, or not responding to all Beck Anxiety Inventory (BAI) questions. As such, data from  
213  $N = 272$  participants was used in the data analysis.

## 214 **Study 2 (Reward-seeking)**

215 We recruited undergraduate participants at the University of British Columbia to  
216 participate online in our study. These participants received one percentage point towards  
217 their grade in a psychology course of their choosing and a CAD \$5.00 gift card from  
218 Starbucks for completing the study. Of these participants,  $N = 83$  finished the study, of  
219 which  $N = 43$  were part of a separate task condition with visual appetitive stimuli that is  
220 beyond the scope of this paper and  $N = 4$  were excluded for not completing the pre-task  
221 survey, having below 50% accuracy on active or inhibitory avoidance trials, spending over  
222 100 s on any given attention check, or incorrectly responding to a pre-task attention check.  
223 As such, data from  $N = 36$  participants was used in the data analysis.

224 Additionally, we recruited paid online workers from around the world ( $N = 309$ ) on  
225 the Prolific online study platform. These participants received GBP £8.07 and a £2.69  
226 bonus for completing the study. Of these participants,  $N = 300$  finished the study, of which  
227  $N = 26$  were excluded for not completing the pre-task survey, having below 50% accuracy on  
228 active or inhibitory avoidance trials, spending over 100 s on any given attention check, or  
229 incorrectly responding to a pre-task attention check. As such, data from  $N = 274$   
230 participants was used in the data analysis.

231 Overall, the excluded sample across both studies was 29.17% female and 70.83% male,  
232 while the analyzed sample was 45.90% female and 54.10% male.

233 **Materials and Methods**

234 *Stimulus presentation*

235 We used PsychoPy 2020.1.2 (RRID: SCR\_006571) via the Pavlovia online study  
236 platform (Peirce, Gray, Simpson, MacAskill, Höchenberger, Sogo, Kastman, and Lindeløv,  
237 2019). Participants completed the study online on their own computers; they were not  
238 allowed to complete the study on mobile devices or tablets.

239 *Stimuli*

240 Cues indicating active or inhibitory trials were dark blue squares and circles with a  
241 thin black border and were generated by PsychoPy 2020.1.2 (Peirce, Gray, Simpson,  
242 MacAskill, Höchenberger, Sogo, Kastman, and Lindeløv, 2019) (Fig. ??); they subtended a  
243 visual angle of about 11.5° x 11.5°. All stimuli were presented against a grey background  
244 (RGB value [0,0,0] on a scale from -1 to 1). If participants responded incorrectly on any trial  
245 in the avoidance studies, an aversive sound was played for 2000 ms. The aversive sounds  
246 were randomly selected from a set of eight screeching and scraping sounds created by our lab  
247 and ranked as highly aversive by four independent raters and in a pilot study.

248 Participants completed a series of questionnaires before beginning the main task.  
249 These were the State-Trait Anxiety Inventory, form Y-2 (STAI Y-2) (Spielberger, 2008); the  
250 Beck Depression Inventory II (BDI) (Beck, Steer, and Brown, 1996); the Beck Anxiety  
251 Inventory (BAI) (Steer and Beck, 1997); the Behavioral Activation for Depression Scale  
252 (BADSD) (Kanter, Mulick, Busch, Berlin, and Martell, 2007); the Generalized Anxiety  
253 Disorder Scale (GAD-7) (Spitzer, Kroenke, Williams, and Löwe, 2006); and the Behavioural  
254 Inhibition Scale and Behavioural Activation Scale (BIS/BAS) (Carver and White, 1994). In  
255 our data analysis, we looked at results from the BDI and BAI as these clinically validated  
256 scales most directly capture participants' levels of current depressive and anxiety scores. The  
257 BADSD, GAD-7, and BIS/BAS capture specific behavioural facets of depression and anxiety

258 that are less relevant to understanding overall effects of mood and anxiety disorders on  
259 avoidance and reward-seeking and were not analyzed in this study. We used the BAI as our  
260 primary measure of anxiety scores as it is the most widely used and validated among the  
261 anxiety scales we included (Fydrich, Dowdall, and Chambless, 1992) and as its structure  
262 parallels that of the BDI.

## 263 **Procedure**

### 264 *Avoidance task*

265 A graphical overview of the avoidance task is provided in Fig. ??A.

266 After an introduction screen, participants completed an effort calibration to control  
267 for differences in baseline effort ability and keyboard sensitivity. They were instructed to  
268 press the spacebar on their computer as many times as possible within a five-second period  
269 when a thermometer appeared on screen. Each time they pressed the spacebar, the  
270 thermometer would increase in height in order to incentivize participants to press the  
271 spacebar as many times as possible. Afterwards, participants repeated this effort calibration.  
272 This second calibration was identical to the first except that the thermometer would increase  
273 by only half the amount per press that it did for the first calibration, in order to incentivize  
274 participants to press more times during the second calibration and thereby better capture  
275 the participant's maximum effort capability.

276 Following the effort calibration, participants completed an audio calibration to  
277 control for differences in audio cards and speakers. Here, participants were presented with a  
278 series of three one-second 2400 Hz sine tones - spaced by one second - at volumes of -50 dB,  
279 -30 dB, and -10 dB from maximum. After listening to these tones, participants were asked  
280 whether the first tone was barely heard and the final tone was aversive but not painful  
281 (Neumann and Waters, 2006). If this was not the case, participants were asked to adjust the  
282 volume on their computer and play the three tones again, repeating the process until the

283 sound met these criteria - equalizing the experience of the sounds across participants. This  
284 computer volume was then used for the rest of the task.

285 After calibrating their physical effort capability and the volume of the aversive stimuli  
286 in the task, participants read instructions indicating the shape to which they would have to  
287 respond with multiple spacebar presses as well as the shape to which they would have to  
288 withhold their response. They also heard an example of the aversive sound that would be  
289 played if they made an incorrect response during the task.

290 In order to gain exposure to the stimuli and task contingencies, participants  
291 completed a series of practice trials (Fig. ??A). This consisted of five trials in which  
292 participants had to make an active avoidance response - pressing the spacebar several times  
293 to avoid hearing an unpleasant sound; five trials in which participants had to make an  
294 inhibitory avoidance response - not pressing the spacebar to avoid hearing an aversive sound;  
295 and ten trials that intermixed these active and inhibitory trials.

296 On each trial, participants first viewed a grey screen with a white fixation cross for a  
297 mean duration of 2000 ms with a standard deviation (SD) of 1200 ms, jittered according to a  
298 normal distribution with these parameters on each trial. Participants then saw a visual cue -  
299 either a blue circle or a blue square - for 2000 ms. The cues used for active and inhibitory  
300 trials were pseudorandomly intermixed between participants. While this cue was on-screen,  
301 participants had to press the spacebar multiple times on active avoidance trials or withhold  
302 pressing on inhibitory avoidance trials. On active trials, the number of presses required was  
303 set according to the average number of presses made during the two effort calibration trials,  
304 such that participants who pressed fewer times during the calibration would have to press  
305 fewer times to achieve criterion during the task. The initial criterion was 5 presses given an  
306 average of 18 or fewer presses during calibration; a criterion of 6 presses given an average of  
307 19-33 presses inclusive during calibration; and 7 presses given an average of 34 or more  
308 presses during calibration.

309 If participants made an incorrect response (pressing an insufficient number of times  
310 on active trials or pressing at all on inhibitory trials), participants heard an aversive sound  
311 and saw a fixation cross for 2000 ms. This aversive sound was taken from a set of ten sounds  
312 created by our lab and rated as highly aversive. All sounds were scraping sounds that had  
313 unpleasant psychoacoustic properties shown to reliably induce aversive responses (Neumann  
314 and Waters, 2006) at a variety of frequencies. If participants made a correct decision  
315 (pressing a sufficient number of times on active trials or not pressing on inhibitory trials),  
316 they saw a fixation cross surrounded by a white border that acted as a safety signal on the  
317 edges of the screen for 500 ms.

318 After completing the practice trials and viewing a final screen reminding them of the  
319 instructions, participants began the main task. This consisted of up to 168 active avoidance  
320 trials and 72 inhibitory avoidance trials (70% active and 30% inhibitory), pseudorandomized  
321 such that no more than 6 active trials or 3 inhibitory trials appeared in a row. On the 15th  
322 trial and every 40 trials thereafter, an attention check appeared asking participants to press  
323 a key corresponding to the letter they heard, to ensure that they were attending to the task  
324 and able to hear auditory stimuli. Every 20 trials, the number of button presses required on  
325 active trials increased by one press - this increased the effort demands on active trials across  
326 the task. The task continued until the participant responded correctly on half or less than  
327 half of the last 20 active trials - at this point, the breakpoint was reached and the participant  
328 was thanked for completing the task.

### 329 *Reward-seeking task*

330 A graphical overview of the reward-seeking task is provided in Fig. ??B.

331 The design of the reward-seeking task was identical to that of the avoidance task,  
332 with the following exceptions. First, the practice blocks were based on criterion-based  
333 advancement in order to increase consistency with the design of other reward-seeking studies

334 in our lab. Participants had to achieve at least 80% accuracy in each of the active, inhibitory,  
335 and intermixed reward-seeking trial blocks in order to advance; each block would repeat until  
336 they achieved each criterion. Second, if the participant made a correct decision during a trial,  
337 they would see a screen indicating that they had gained 5 points along with a sum of their  
338 points thus far; if the participant made an incorrect response during a trial, they would see a  
339 screen indicating that they had gained 0 points along with a sum of their points thus far.  
340 Both screens appeared for 1500 ms. Undergraduate participants received a CAD \$5 gift card  
341 as a reward in addition to course credit for completing the task; online workers received a  
342 GBP £2.69 payment as a reward in addition to their payment for completing the task.  
343 Finally, as this task did not incorporate audio, no volume check or audio-based attention  
344 check was included.

### 345 **Data analysis**

346 All data was analyzed using R 4.1.1 “Kick Things” (R Development Core Team,  
347 2011) through RStudio (Booth et al., 2018). On each behavioural task, we measured: 1)  
348 participants’ sensitivity ( $d'$ ), operationalized as the rate of correct active trials (hit rate)  
349 minus the rate of incorrect inhibitory trials (false alarm rate) and calculated using the  
350 `dprime` function in the `psycho` R package (Makowski, 2018) as the Z value of the hit rate  
351 minus the Z value of the false alarm rate; 2) effort on each trial type, operationalized as the  
352 number of presses made relative to criterion on each trial, averaged per block. 3)  
353 participants’ depressive and anxiety scores, operationalized as their BDI (Beck, Steer, and  
354 Brown, 1996) and BAI (Steer and Beck, 1997) scores respectively; and 4) breakpoint,  
355 operationalized as the trial number on which the participant responded incorrectly on half or  
356 less than half of the last 20 active trials. Breakpoint captures the point at which the effort  
357 demands of the task are no longer attainable for the participant, which is impaired in people  
358 with depression (Hershenberg, Satterthwaite, Daldal, Katchmar, Moore, Kable, and Wolf,  
359 2016). On inhibitory trials, effort reflects the total number of presses made, to capture

360 mistakes in which responses were still made on inhibitory trials. In order to capture all task  
361 parameters parsimoniously in our analyses, we analyzed sensitivity for avoidance and  
362 reward-seeking through four linear models in which either anxiety scores (BAI scores) or  
363 depression scores (BDI scores), together with gender and sample (university undergraduates  
364 vs. online workers), were included as predictors. We also analyzed effort for avoidance and  
365 reward-seeking through four multi-level models (using the `lmerTest` R package (Kuznetsova,  
366 Brockhoff, and Christensen, 2017)) in which either anxiety scores (BAI scores) or depression  
367 scores (BDI scores), together with gender, sample, and block of 28 active trials, were  
368 included as fixed effects and participant was a random effect. Lastly, we analyzed breakpoint  
369 for avoidance and reward-seeking using two linear models in which either anxiety scores  
370 (BAI scores) or depression scores (BDI scores), together with gender and sample (university  
371 undergraduates vs. online workers), were included as predictors. Linear models were used for  
372 sensitivity and breakpoint as these factors did not differ within participants, unlike effort -  
373 which differed between active and inhibitory trials, making a multi-level model appropriate.  
374 All analyses were Bonferroni corrected for multiple comparisons. All confidence intervals  
375 were based on 1000 bootstrap replications using the `confintr` R package (Mayer, 2022). All  
376 BDI and BAI scores were divided by the maximum number of points possible on each scale  
377 to obtain proportion scores. This was necessary because of the exclusion from our surveys of  
378 a BDI question relating to suicidality as the inclusion of such a question was not covered in  
379 our ethics, and because of the omission from our surveys of a BAI question that was used as  
380 an attention check – rendering raw BDI and BAI scores not comparable to those of other  
381 studies.

382

## Results

### 383 Demographics

384 Participant's reported gender and sex heavily overlapped. Of those reporting their  
385 gender as female, there was a 97.53% overlap with reported sex in women and 97.67%



386 overlap in men on the avoidance tasks. There was a 98.84% overlap with reported sex  
387 women and 97.80% overlap in men on the reward-seeking task. For this reason, the following  
388 results are expressed in terms of gender only. Women reported higher levels of depressive  
389 scores ( $t(720.46) = -3.83, p < .001, d = 0.27$ ) and anxiety scores ( $t(703.99) = -4.68, p <$   
390  $.001, d = 0.34$ ) than men across samples (Table ??, Figs. ??, ??). Across both studies,  
391 20.98% of women and 15.11% of men were on medication for depression, and 19.35% of  
392 women and 14.89% of men were on medication for anxiety. For participants on these  
393 medications, BAI and BDI scores reflect their anxiety and depression scores in a medicated  
394 state and participants' medication status was not included as a statistical control in our  
395 analyses. There were no significant differences in depression ( $t(582.52) = -1.61, p = 0.109, d$   
396  $= -0.12$ ) or anxiety ( $t(588.90) = -0.22, p = 0.823, d = -0.02$ ) between samples.

### 397 **Avoidance task**

398 To account for participants' bias to engage in active relative to inhibitory avoidance  
399 in general, we first calculated sensitivity ( $d'$ ). Sensitivity reflects participants' ability to  
400 correctly distinguish between active and inhibitory trials and deploy the required amount of  
401 effort on active trials only, while withholding effort on inhibitory trials. We additionally  
402 present results of active and inhibitory avoidance accuracy analyses at the link to the OSF  
403 repository in the data and code availability section (<https://osf.io/2rd3f/>). As all variance in  
404 sensitivity was between subjects, we ran a linear model analysis (Table ??) to evaluate  
405 whether  $d'$  could be predicted from anxiety scores (BAI scores), gender, and sample in  
406 avoidance. Gender in interaction with anxiety scores significantly predicted sensitivity in the  
407 avoidance task such that women had lower performance with higher levels of anxiety (Fig.  
408 ??A). There was also a BAI x Sample interaction such that participants with high anxiety in  
409 the global sample had lower performance than those with high anxiety in the undergraduate  
410 sample. We ran an additional linear model analysis (Table ??) to evaluate whether  $d'$  could  
411 be predicted from depression scores (BDI scores), gender, and sample in avoidance (Fig.

412 ??B). Depression scores and sample significantly predicted  $d'$ , as did interactions between  
413 depression scores and gender, and between depression scores and sample - such that there  
414 was a significant interaction with women having lower sensitivity given higher depression  
415 scores. As with anxiety, women had lower performance with higher levels of depression.  
416 Women in the online worker sample had lower performance than those in the undergraduate  
417 sample given higher levels of depression.

418         Additionally, we explored the extent to which the amount of effort that participants  
419 exerted to avoid aversive outcomes changed across the avoidance task. As effort deployment  
420 could differ both between and within subjects, we conducted a multi-level model analysis  
421 (Table ??) to evaluate whether effort deployment could be predicted from anxiety (BAI)  
422 scores, gender, sample, and block (28 active trials) in avoidance. This analysis revealed that  
423 participants deployed increasing amounts of effort during the task to meet increasing effort  
424 requirements (Fig. ??A). There was also an interaction between gender and block qualified  
425 by a 3-way interaction between gender, BAI score, and block, indicating that the decrease in  
426 effort over time was associated with increased anxiety primarily in women (Fig. ??B). We  
427 ran an additional multi-level model analysis (Table ??) to evaluate whether effort could be  
428 predicted from depression (BDI) scores, gender, sample, and block in avoidance. Changes in  
429 effort across blocks during the task interacted with participants' BDI scores and with gender,  
430 such that women with higher levels of depression deployed less effort relative to criterion in  
431 active avoidance.

432         Last, we examined whether breakpoint could be predicted from anxiety scores (BAI  
433 scores) or depression scores (BDI scores), gender, and sample in avoidance using two linear  
434 models (Tables ??, ??). None of these factors significantly predicted breakpoint in avoidance.

435 **Reward-seeking task**

436 To evaluate participants' bias to engage in active relative to inhibitory  
437 reward-seeking, we again calculated sensitivity ( $d'$ ). We ran a linear model analysis (Table  
438 ??) to evaluate whether  $d'$  could be predicted from anxiety scores (BAI scores), gender, and  
439 sample in reward-seeking. Only gender significantly predicted sensitivity in the  
440 reward-seeking task (Fig. ??). We ran an additional linear model analysis (Table ??) to  
441 evaluate whether  $d'$  could be predicted from depression scores (BDI scores), gender, and  
442 sample in avoidance. None of these factors predicted sensitivity in reward-seeking.

443 Additionally, we explored the extent to which the amount of effort that participants  
444 deployed to obtain reward changed across the reward-seeking task. We ran a multi-level  
445 model analysis (Table ??) to evaluate whether effort deployment could be predicted from  
446 anxiety scores (BAI scores), gender, and sample in reward-seeking. This analysis revealed  
447 that effort decreased relative to criterion as the reward-seeking task progressed (Fig. ??A).  
448 There were also effects of gender, with men deploying overall more effort than women, and  
449 anxiety, such that those with higher levels of anxiety were less able to deploy effort relative  
450 to criterion. These were qualified by an interaction between gender and anxiety such that  
451 women increased effort and men decreased it with higher levels of anxiety (Fig. ??B). There  
452 were also a number of differences in effort deployment between samples, which interacted  
453 with a number of other predictors. We ran an additional multi-level model analysis (Table  
454 ??) to evaluate whether effort could be predicted from depression scores (BDI scores),  
455 gender, sample, and block in reward-seeking. Only task block and gender predicted effort  
456 when depression scores were included as a predictor, such that women with higher depression  
457 scores deployed less effort relative to criterion in active reward-seeking.

458 Last, we examined whether breakpoint could be predicted from anxiety scores (BAI  
459 scores) or depression scores (BDI scores), gender, and sample in reward-seeking using two  
460 linear models (Tables ??, ??). None of these factors significantly predicted breakpoint in

461 reward-seeking.

## 462 Discussion

### 463 Summary

464 In the present study, we investigated effects of gender and anxiety and depression  
465 levels in active and inhibitory avoidance and reward-seeking behaviours in a community  
466 population. Compared to men, women showed overall higher levels of self-reported  
467 depression and anxiety. Gender differences in task performance were in opposite directions  
468 depending on whether the task demanded avoidance or reward-seeking. Women showed  
469 lower sensitivity ( $d'$ ), a measure of ability to correctly respond to active *and* inhibitory task  
470 demands, when avoiding an aversive outcome than men - but higher sensitivity when seeking  
471 reward. During active and inhibitory *avoidance*, gender interacted with anxiety level such  
472 that, in women, higher anxiety scores predicted lower sensitivity. There were also gender  
473 differences in effort deployment. Overall, throughout active *reward-seeking* trials, men made  
474 more effortful responses than women. Yet this finding was qualified by an interaction  
475 between gender and anxiety (over time) in both avoidance *and* reward-seeking, such that  
476 higher effort levels were associated with anxiety levels for women in both tasks, particularly  
477 early in the task. It should be noted that, in effortful reward seeking, effort deployment  
478 above criterion differed by sample such that online workers deployed more effort across the  
479 task and with increasing anxiety scores than undergraduate participants. Our findings  
480 illuminate gender differences in performance when both active and inhibitory responses are  
481 required for avoidance and reward-seeking in a context where effort is required to obtain the  
482 desired outcome. They also point to important boundary conditions for correlational effects  
483 that may vary between populations.

### 484 Interpretation of results

485 *Effects of gender and anxiety on avoidance task performance*

486 We observed that, in avoidance, gender differences in performance (sensitivity;  $d'$ )  
487 where men had higher performance than women were moderated by anxiety, where women  
488 with higher anxiety had lower performance in the avoidance task. This finding is consistent  
489 with previous findings that avoidance behaviours are influenced by mood and anxiety levels  
490 (Pittig, Treanor, LeBeau, and Craske, 2018) which may partly explain overall gender  
491 differences in this task because of baseline gender differences in the prevalence of depression  
492 and anxiety (Parker and Brotchie, 2010). In particular, the observed gender differences in  
493 selecting the correct response on active vs. inhibitory trials (sensitivity;  $d'$ ) when avoiding an  
494 unpleasant outcome could reflect more general gender differences in stress tolerance. In our  
495 study, women reported overall higher anxiety scores than men. Parker and Brotchie (2010)  
496 argued that women have a higher predisposition (diathesis) to stress than men and, in a  
497 context where an aversive outcome must be avoided, people with higher levels of anxiety  
498 scores may have a stronger impulse to act to avoid an aversive outcome (Bishop and Gagne,  
499 2018). Thus, inhibiting a response may be especially difficult given a combination of high  
500 anxiety scores and a decreased tolerance for stress in women compared to men. Such a  
501 gender difference in diathesis could drive a reduced ability to inhibit effort when needed - an  
502 impairment in shifting from an active to an inhibitory strategy given higher levels of anxiety  
503 scores (Gustavson, Altamirano, Johnson, Whisman, and Miyake, 2017). Response inhibition  
504 can also require cognitive effort. People may have differing tendencies to make physically  
505 effortful responses to avoid aversive outcomes or obtain rewards, and to maintain an  
506 awareness that a cue is associated with withholding a response. Mood disorders have been  
507 associated with undervaluation of the reward of a cognitively effortful outcome (Grahek,  
508 Musslick, and Shenhav, 2020). Most of these findings have been associated with depression  
509 and reward-seeking. However, the reduced sensitivity with higher BAI scores observed in  
510 women in our avoidance task could reflect not only reduced motivation for physical effort on  
511 active trials with higher levels of anxiety but also reduced motivation to deploy cognitive

512 effort to inhibit one's response on inhibitory trials.

513 Gender differences in avoidance were also moderated by depression scores, such that  
514 women with higher depression scores performed worse on the avoidance task. Effects of  
515 depression scores, as measured by BDI scores, on task performance mostly reflected effects of  
516 anxiety. This is consistent with past findings that negative effects of anxiety and depression  
517 on motivated behaviours like avoidance and reward-seeking are often similar (Ottenbreit,  
518 Dobson, and Quigley, 2014), emphasizing the importance of a transdiagnostic approach when  
519 evaluating the impact of anxiety and depression on these behaviours (Culbreth, Moran, and  
520 Barch, 2018). It may also reflect the extent to which the BAI and BDI measure overlapping  
521 constructs, as reflected by the high correlation between BAI and BDI scores we observed  
522 ( $t(852) = 23.86, p = < .001, r = 0.63$ ).

523 *Effects of gender and anxiety on effort deployment in reward-seeking and*  
524 *avoidance*

525 In reward-seeking, we observed an opposing relationship between gender and effort  
526 deployment to that in avoidance. Women deployed more effort relative to criterion at higher  
527 anxiety scores than men, while men continued to deploy less effort with higher anxiety scores.  
528 The diathesis effects that may impair effective effort deployment in avoidance may not be  
529 present in reward-seeking, as effects of an error are likely to be less stressful to participants.  
530 Therefore, the observed effort impairments in women may be valence-specific.

531 On active reward-seeking trials, men deployed more effort relative to criterion across  
532 the task than women. This could be caused by women having smaller wrists with which to  
533 generate physical force than men (Morse, Jung, Bashford, and Hallbeck, 2006), as well as  
534 men having - on average - higher levels of testosterone levels compared to women - which is  
535 associated with increased physical effort (Losecaat Vermeer, Riečanský, and Eisenegger,  
536 2016) and risk tolerance (Cooper, Goings, Kim, and Wood, 2014). This initial difference in

537 effort deployment capability is reflected in the finding that men pressed significantly more  
538 than women in the pre-task effort calibration across all tasks ( $t(814.99) = 7.02, p = < .001$ ).  
539 Although our tasks did not have competitive elements, participants may still have completed  
540 the task with an eye towards maximizing performance. Since deploying more effort in the  
541 task would increase one's chance of staying above criterion, this increased effort deployment  
542 in men could explain the increased active trial accuracy for men across the avoidance and  
543 reward-seeking tasks. It is important to qualify that gender has a significant cultural  
544 component, and cultural factors could also play a role in gender differences in effort  
545 deployment - perhaps via effects of a lower tolerance for stress on effort deployment (Parker  
546 and Brotchie, 2010). Importantly, in both tasks gender interacted with anxiety levels and, in  
547 the avoidance task, gender differences in effort was qualified by a relationship with anxiety  
548 early in the task, with women higher in anxiety scores deploying higher effort levels early on.  
549 Thus any gender differences in effort are complex, and vary with anxiety levels, motivational  
550 context, and likely other boundary conditions as well.

551         It should be noted that the relationship between higher anxiety scores and reduced  
552 avoidance sensitivity, while qualified by gender and sample, differs from previous predictions  
553 of improved avoidance in anxiety, such as those of Bishop and Gagne (2018). Bishop and  
554 Gagne framed this relationship in terms of active and not inhibitory avoidance, as they  
555 predicted that underestimations of effort cost would drive excessive avoidance behaviours.  
556 Anxiety scores may be associated with impairments to inhibitory avoidance precisely because  
557 of this bias towards action given the possibility of aversive outcomes, an effect that could be  
558 driven by a perceived lack of control over outcomes in the task (Wang and Delgado, 2021).  
559 Additionally, we did not observe a relationship between depression scores and accuracy or  
560 effort deployment in reward-seeking, as has previously been observed (Bishop and Gagne,  
561 2018). As depression scores did not influence effort deployment, we can speculate that, in  
562 this task, the effort demands of the task did not deter those with higher depression scores  
563 from working for a reward.

564 Overall, participants deployed less effort in avoidance compared to reward-seeking;  
565 this could be a function of differences in motivation to engage in avoidance or reward-seeking.  
566 Motivation to complete the tasks can be driven in part by participants' valuations of  
567 task-relevant stimuli (Bishop and Gagne, 2018). A major difference between our tasks arises  
568 in the outcome of an incorrect response. In avoidance, an incorrect response is associated  
569 with an aversive sound; in reward-seeking, it is associated with not receiving points.  
570 Although the salience of an aversive sound may suggest that it is more motivating and would  
571 therefore be associated with increased accuracy, hearing it may also be more demotivating -  
572 especially for participants with mood disorder symptoms. Hearing the aversive sound  
573 repeatedly could be a salient indicator of a lack of control over task outcomes (Wang and  
574 Delgado, 2021).

## 575 **Limitations**

576 There are some limitations to our interpretation of our findings. First, since the  
577 dichotomy of the task demands is between effortful active trials and inhibitory trials that  
578 require no effort, we cannot compare the effects of high vs. low effort demands on inhibitory  
579 avoidance or reward-seeking behaviours. As such, our interpretation of the relationship  
580 between effort deployment and mood disorder symptoms only extends to active trials.  
581 Accuracy in the task was likely tied to participants' effort capabilities, as increased effort  
582 deployment was required throughout the task on active trials to meet the criterion level of  
583 effort and make the correct response on the trial. However, we calibrated the criterion to  
584 participants' effort ability and considered performance on inhibitory as well as active trials  
585 to reduce the reliance of task outcomes on individual differences in effort deployment.  
586 Additionally, as the proportion of active trials was greater than that of inhibitory trials,  
587 participants may have become increasingly fatigued on the majority of trials in the task.  
588 This fatigue from effort deployment, combined with boredom (from the task being repetitive)  
589 could be difficult to disentangle from other shifts in motivation to deploy effort throughout



590 the task (e.g. those related to the value of avoidance or reward-seeking). However, as fatigue  
591 is likely to arise in most physically effortful tasks, our tasks still reflect real-world physical  
592 effort demands. Furthermore, as this study took place online, the study had to use repeated  
593 keyboard presses instead of other, more continuous or better-controlled measures of physical  
594 effort such as a grip squeeze (Aridan, Malecek, Poldrack, and Schonberg, 2019). However,  
595 repeated button presses have been validated as being physically effortful and have been used  
596 in in-person contexts (Gold, Strauss, Waltz, Robinson, Brown, and Frank, 2013).

597         When predicting avoidance sensitivity, we observed interactions between BAI and  
598 BDI scores and sample; when predicting reward-seeking effort, we observed an interaction  
599 between gender and sample. This suggests that performance differences related to anxiety,  
600 depression, or gender differ according to the demographic makeup of each sample. For  
601 example, women reported overall higher levels of anxiety than men. The interaction we  
602 observed between BAI scores and sample in predicting  $d'$  in the avoidance task may suggest  
603 a differing relationship between performance and anxiety levels between the younger,  
604 female-skewed online undergraduates and older, male-skewed online workers. As online  
605 workers were paid in money for participation while undergraduates received course credit,  
606 motivations for completing the task may also have differed between samples. In addition, the  
607 online workers were likely a more heterogeneous sample in terms of the devices and contexts  
608 in which they completed the task. It should also be noted that, whereas the avoidance study  
609 was well-balanced between males and females, the reward-seeking study had a substantially  
610 higher proportion of male to female participants - as a result of the higher proportion of  
611 males in the larger, online worker sample in this study. It may be that the interactions we  
612 observed between sample and gender in predicting reward-seeking effort deployment can be  
613 explained by this substantially higher proportion of male to female participants. However,  
614 the presence of significant effects that do not interact with sample in both studies suggest  
615 that sample differences did not explain a large proportion of the variance in our findings.

616 Additionally, with a final  $N$  of 310 participants' data analyzed, the reward-seeking  
617 study fell short of our target sample size because of limitations in availability of the  
618 undergraduate sample. For this reason, it may have been underpowered to reliably detect  
619 higher-order interactions.

## 620 **Future work**

621 Future studies could build on our findings by investigating how patterns of  
622 information about specific aspects of effortful avoidance and reward-seeking are instantiated  
623 in key brain regions. The posterior anterior cingulate cortex (pACC) and ventral striatum  
624 encode information about prospective gains given physical effort requirements (Aridan,  
625 Malecek, Poldrack, and Schonberg, 2019). These regions - and their homologues in rodents -  
626 have been shown to be differentially necessary for active vs. inhibitory avoidance (Piantadosi,  
627 Yeates, and Floresco, 2018) and reward-seeking (Capuzzo and Floresco, 2020). Investigating  
628 how these regions represent information on prospective threats and gains relative to effort  
629 costs could illuminate how we weigh the benefits and costs of deploying effort to obtain  
630 rewards and avoid aversive outcomes. Additionally, separating out different factors  
631 contributing to effort deployment through a computational modelling approach would be  
632 important to understand the individual contributions of various factors to participants'  
633 performance. These factors could include action biases (Mkrtchian, Aylward, Dayan, Roiser,  
634 and Robinson, 2017), perceived value of avoidance or reward (Bishop and Gagne, 2018), or  
635 fatigue (Pessiglione, Vinckier, Bouret, Daunizeau, and Le Bouc, 2018). Furthermore, it  
636 would be helpful to evaluate whether subscales of mood disorder symptoms - potentially  
637 linked to subtypes such as anxious depression (Wurst, Schiele, Stonawski, Weiß, Nitschke,  
638 Hommers, Domschke, Herrmann, Pauli, Deckert, and Menke, 2021) - pull out factors that  
639 drive participants' behaviours in avoidance and reward seeking. This analysis could further  
640 illuminate our observed gender differences - for example, to evaluate whether reduced  
641 avoidance sensitivity in women given increased anxiety scores is reflective of an anxious

642 subtype of depression (Wurst, Schiele, Stonawski, Weiß, Nitschke, Hommers, Domschke,  
643 Herrmann, Pauli, Deckert, and Menke, 2021).

## 644 **Conclusion**

645 Our studies address outstanding questions of whether a range of anxiety and  
646 depression scores predict performance (sensitivity) and effort deployment in avoidance and  
647 reward-seeking, and whether the relationship between performance and anxiety/depression  
648 levels is impacted by gender. We elicit both active and inhibitory avoidance and  
649 reward-seeking behaviours in a context that allows for direct comparisons between them,  
650 instead of considering avoidance and reward-seeking behaviours as unitary wholes. We  
651 highlight gender differences in each of these subtypes of avoidance and reward-seeking given  
652 varying levels of anxiety and depression scores, contextualizing past work on gender  
653 differences (Parker and Brotchie, 2010). In particular, we are the first to examine these  
654 proposed gender differences in an active and inhibitory avoidance and reward-seeking  
655 context. These findings could inform clinical interventions to address maladaptive  
656 deployment of avoidance and lack of motivation for reward-seeking, targeted by gender.  
657 Additionally, we link active avoidance and reward-seeking to motivation for physical effort  
658 deployment given varying levels of mood and anxiety disorder severity. As many tasks in life  
659 require physical effort deployment, understanding where it can be impaired is an important  
660 pursuit. Our findings underscore the importance of considering individual differences in the  
661 ways in which avoidance and reward-seeking can be impaired in life.

## 662 **Data and code availability**

663 The data and materials for all experiments, as well as the code used to generate this  
664 manuscript and conduct all analyses, are available at <https://osf.io/2rd3f/>.

References

665

666

667

668

669

670

671

672

673

674

675

676

677

678

679

680

681

682

683

684

685

686

687

688

689

690

691

- Alloy LB, Olino T, Freed RD, Nusslock R (2016) Role of Reward Sensitivity and Processing in Major Depressive and Bipolar Spectrum Disorders. *Behavior Therapy* 47:600–621.
- Altemus M, Sarvaiya N, Neill Epperson C (2014) Sex differences in anxiety and depression clinical perspectives. *Frontiers in Neuroendocrinology* 35:320–330.
- Aridan N, Malecek NJ, Poldrack RA, Schonberg T (2019) Neural correlates of effort-based valuation with prospective choices. *NeuroImage* 185:446–454.
- Auerbach RP, Pagliaccio D, Hubbard NA, Frosch I, Kremens R, Cosby E, Jones R, Siless V, Lo N, Henin A, Hofmann SG, Gabrieli JDE, Yendiki A, Whitfield-Gabrieli S, Pizzagalli DA (2022) Reward-Related Neural Circuitry in Depressed and Anxious Adolescents: A Human Connectome Project. *Journal of the American Academy of Child & Adolescent Psychiatry* 61:308–320.
- Beck AT, Steer RA, Brown GK (1996) *Manual for the beck depression inventory-II*. San Antonio, TX: Psychological Corporation.
- Biesanz J (2020) *Fabs: Functions for applied behavioural sciences in r*.
- Bishop SJ, Gagne C (2018) Anxiety, depression, and decision making: A computational perspective. *Annual Review of Neuroscience* 41:371–388.
- Booth DS et al. (2018) RStudio: Integrated development for r. *Nature*.
- Browning M, Behrens TE, Jocham G, O'Reilly JX, Bishop SJ (2015) Anxious individuals have difficulty learning the causal statistics of aversive environments. *Nature Neuroscience* 18:590–596.
- Capuzzo G, Floresco SB (2020) Prelimbic and infralimbic prefrontal regulation of active and inhibitory avoidance and reward-seeking. *Journal of Neuroscience* 40:4773–4787.
- Carver CS, White TL (1994) Behavioral inhibition, behavioral activation, and affective responses to impending reward and punishment: The BIS/BAS scales.

- 692 Journal of Personality and Social Psychology.
- 693 Cléry-Melin ML, Schmidt L, Lafargue G, Baup N, Fossati P, Pessiglione M (2011)
- 694 Why don't you try harder? An investigation of effort production in major
- 695 depression. *PLoS ONE* 6.
- 696 Cools R (2008) Role of Dopamine in the Motivational and Cognitive Control of
- 697 Behavior. *The Neuroscientist* 14:381–395.
- 698 Cooper SE, Goings SP, Kim JY, Wood RI (2014) Testosterone enhances risk
- 699 tolerance without altering motor impulsivity in male rats.
- 700 *Psychoneuroendocrinology* 40:201–212.
- 701 Culbreth AJ, Moran EK, Barch DM (2018) Effort-cost decision-making in psychosis
- 702 and depression: Could a similar behavioral deficit arise from disparate
- 703 psychological and neural mechanisms? *Psychological Medicine* 48:889–904.
- 704 Dillon DG, Rosso IM, Pechtel P, Killgore WDS, Rauch SL, Pizzagalli DA (2014) Peril
- 705 and pleasure: An RDOC-inspired examination of threat responses and reward
- 706 processing in anxiety and depression. *Depression and Anxiety* 31:233–249.
- 707 Fydrich T, Dowdall D, Chambless DL (1992) Reliability and validity of the beck
- 708 anxiety inventory. *Journal of Anxiety Disorders* 6:55–61.
- 709 Gold JM, Strauss GP, Waltz JA, Robinson BM, Brown JK, Frank MJ (2013)
- 710 Negative symptoms of schizophrenia are associated with abnormal effort-cost
- 711 computations. *Biological Psychiatry* 74:130–136.
- 712 Goldstein-Piekarski AN, Williams LM, Humphreys K (2016) A trans-diagnostic
- 713 review of anxiety disorder comorbidity and the impact of multiple exclusion
- 714 criteria on studying clinical outcomes in anxiety disorders. *Translational*
- 715 *Psychiatry* 6:e847–e847.
- 716 Grahek I, Musslick S, Shenhav A (2020) A computational perspective on the roles of
- 717 affect in cognitive control. *International Journal of Psychophysiology* 151:25–34.
- 718 Gustavson DE, Altamirano LJ, Johnson DP, Whisman MA, Miyake A (2017) Is set

- 719           shifting really impaired in trait anxiety? Only when switching away from an  
720           effortfully established task set. *Emotion* 17:88–101.
- 721       Hershenberg R, Satterthwaite TD, Daldal A, Katchmar N, Moore TM, Kable JW,  
722           Wolf DH (2016) Diminished effort on a progressive ratio task in both unipolar and  
723           bipolar depression. *Journal of Affective Disorders* 196:97–100.
- 724       Kanter JW, Mulick PS, Busch AM, Berlin KS, Martell CR (2007) The Behavioral  
725           Activation for Depression Scale (BADs): Psychometric Properties and Factor  
726           Structure. *Journal of Psychopathology and Behavioral Assessment* 29:191–202.
- 727       Kessler RC (2006) The epidemiology of depression among women. *Women and*  
728           *Depression: A Handbook for the Social, Behavioral, and Biomedical Sciences*  
729           74:22–38.
- 730       Krypotos AM, Effting M, Kindt M, Beckers T (2015) Avoidance learning: A review of  
731           theoretical models and recent developments. *Frontiers in Behavioral Neuroscience*  
732           9.
- 733       Kuznetsova A, Brockhoff PB, Christensen RHB (2017) lmerTest package: Tests in  
734           linear mixed effects models. *Journal of Statistical Software* 82:1–26.
- 735       LeDoux JE, Moscarello J, Sears R, Campese V (2017) The birth, death and  
736           resurrection of avoidance: A reconceptualization of a troubled paradigm.  
737           *Molecular Psychiatry* 22:24–36.
- 738       Levita L, Hoskin R, Champi S (2012) Avoidance of harm and anxiety: A role for the  
739           nucleus accumbens. *NeuroImage* 62:189–198.
- 740       Losecaat Vermeer AB, Riečanský I, Eisenegger C (2016) Competition, testosterone,  
741           and adult neurobehavioral plasticity, pp213–238. Elsevier.
- 742       Makowski D (2018) The psycho package: An efficient and publishing-oriented  
743           workflow for psychological science. *Journal of Open Source Software* 3:470.
- 744       Mayer M (2022) Confintr: Confidence intervals.
- 745       McLean CP, Asnaani A, Litz BT, Hofmann SG (2011) Gender differences in anxiety

- 746 disorders: Prevalence, course of illness, comorbidity and burden of illness. *Journal*  
747 *of Psychiatric Research* 45:1027–1035.
- 748 Mkrtchian A, Aylward J, Dayan P, Roiser JP, Robinson OJ (2017) Modeling  
749 avoidance in mood and anxiety disorders using reinforcement learning. *Biological*  
750 *Psychiatry* 82:532–539.
- 751 Morse JL, Jung M-C, Bashford GR, Hallbeck MS (2006) Maximal dynamic grip force  
752 and wrist torque: The effects of gender, exertion direction, angular velocity, and  
753 wrist angle. *Applied Ergonomics* 37:737–742.
- 754 Neumann DL, Waters AM (2006) The use of an unpleasant sound as an  
755 unconditional stimulus in a human aversive pavlovian conditioning procedure.  
756 *Biological Psychology* 73:175–185.
- 757 Norbury A, Robbins TW, Seymour B (2018) Value generalization in human  
758 avoidance learning. *eLife* 7.
- 759 Ottenbreit ND, Dobson KS, Quigley L (2014) An examination of avoidance in major  
760 depression in comparison to social anxiety disorder. *Behaviour Research and*  
761 *Therapy* 56:82–90.
- 762 Parker G, Brotchie H (2010) Gender differences in depression. *International Review*  
763 *of Psychiatry* 22:429–436.
- 764 Peirce J, Gray JR, Simpson S, MacAskill M, Höchenberger R, Sogo H, Kastman E,  
765 Lindeløv JK (2019) PsychoPy2: Experiments in behavior made easy. *Behavior*  
766 *Research Methods* 51:195–203.
- 767 Pessiglione M, Vinckier F, Bouret S, Daunizeau J, Le Bouc R (2018) Why not try  
768 harder? Computational approach to motivation deficits in neuro-psychiatric  
769 diseases. *Brain* 141:629–650.
- 770 Piantadosi PT, Yeates DCM, Floresco SB (2018) Cooperative and dissociable  
771 involvement of the nucleus accumbens core and shell in the promotion and  
772 inhibition of actions during active and inhibitory avoidance. *Neuropharmacology*

- 773 138:57–71.
- 774 Pittig A, Treanor M, LeBeau RT, Craske MG (2018) The role of associative fear and  
775 avoidance learning in anxiety disorders: Gaps and directions for future research.  
776 *Neuroscience & Biobehavioral Reviews* 88:117–140.
- 777 R Development Core Team R (2011) R: A language and environment for statistical  
778 computing.
- 779 Rizvi SJ, Pizzagalli DA, Sproule BA, Kennedy SH (2016) Assessing anhedonia in  
780 depression: Potentials and pitfalls. *Neuroscience and Biobehavioral Reviews*  
781 65:21–35.
- 782 Spielberger C (2008) State-trait anxiety inventory for adults. Garden.
- 783 Spitzer RL, Kroenke K, Williams JBW, Löwe B (2006) A Brief Measure for Assessing  
784 Generalized Anxiety Disorder: The GAD-7. *Archives of Internal Medicine*  
785 166:1092.
- 786 Steer RA, Beck AT (1997) Beck anxiety inventory., pp23–40. Lanham, MD, US:  
787 Scarecrow Education.
- 788 Thompson AH, Bland RC (2018) Gender similarities in somatic depression and in  
789 DSM depression secondary symptom profiles within the context of severity and  
790 bereavement. *Journal of Affective Disorders* 227:770–776.
- 791 Treadway MT, Bossaller NA, Shelton RC, Zald DH (2012) Effort-based  
792 decision-making in major depressive disorder: A translational model of  
793 motivational anhedonia. *Journal of Abnormal Psychology* 121:553–558.
- 794 Treadway MT, Buckholtz JW, Schwartzman AN, Lambert WE, Zald DH (2009)  
795 Worth the 'EEfRT'? The effort expenditure for rewards task as an objective  
796 measure of motivation and anhedonia. *PLoS ONE* 4:1–9.
- 797 Wang KS, Delgado MR (2021) The Protective Effects of Perceived Control During  
798 Repeated Exposure to Aversive Stimuli. *Frontiers in Neuroscience* 15:625816.
- 799 Wurst C, Schiele MA, Stonawski S, Weiß C, Nitschke F, Hommers L, Domschke K,



800 Herrmann MJ, Pauli P, Deckert J, Menke A (2021) Impaired fear learning and  
801 extinction, but not generalization, in anxious and non-anxious depression. *Journal*  
802 *of Psychiatric Research* 135:294–301.

### 803 Legend

804 Figure 1: Trial layout diagram. A diagram of the active and inhibitory avoidance and  
805 reward-seeking tasks. In the avoidance task (A), after an inter-stimulus interval (ISI) with a  
806 fixation cross onscreen, participants were presented with a cue associated with active or  
807 inhibitory avoidance. For the active avoidance cue, participants had to respond with  
808 repeated spacebar presses to avoid hearing an aversive sound. For the inhibitory avoidance  
809 cue, participants had to withhold responding to avoid hearing an aversive sound. In the  
810 reward-seeking task (B), after the ISI, participants were presented with a cue associated with  
811 active or inhibitory reward-seeking. For the active reward-seeking cue, participants had to  
812 respond with repeated spacebar presses to obtain points towards a monetary reward. For the  
813 inhibitory reward-seeking cue, participants had to withhold responding to obtain points  
814 towards a monetary reward. ISI = Inter-stimulus interval.

815 Figure 2: Avoidance demographics. Distribution of anxiety (BAI) and depression  
816 (BDI) scores by gender and sample. Proportion scores are scores divided by total possible  
817 score. BAI = Beck Anxiety Inventory, BDI = Beck Depression Inventory II.

818 Figure 3: Linear model significant effects for sensitivity in avoidance. (A) Gender  
819 interacted with anxiety scores (BAI proportion scores) to explain sensitivity ( $d'$ ) in the  
820 avoidance task. (B) Gender interacted with depression scores (BDI proportion scores) to  
821 explain sensitivity ( $d'$ ) in the avoidance task. BAI = Beck Anxiety Inventory. BDI = Beck  
822 Depression Inventory II. Proportion scores are scores divided by total possible score.

823 Figure 4: Avoidance effort deployment. (A) Multi-level model significant effects and  
824 interactions for effort in avoidance. Effort decreased relative to criterion as the avoidance

825 task progressed, an effect that (B) interacted with anxiety scores (BAI) and gender.

826 Proportion scores are scores divided by total possible score.

827 Figure 5: Reward-seeking demographics. Distribution of anxiety (BAI) and  
828 depressive (BDI) scores by gender and sample. Proportion scores are scores divided by total  
829 possible score. BAI = Beck Anxiety Inventory, BDI = Beck Depression Inventory II.

830 Figure 6: Linear model significant effects for sensitivity in reward-seeking. Gender  
831 explained sensitivity ( $d'$ ) in the reward-seeking task. BAI = Beck Anxiety Inventory.  
832 Proportion scores are scores divided by total possible score.

833 Figure 7: Reward-seeking effort deployment. (A) Multi-level model significant effects  
834 and interactions for effort in reward-seeking. Effort decreased relative to criterion as the  
835 reward-seeking task progressed, an effect that (B) interacted with anxiety scores (BAI) and  
836 gender. Proportion scores are scores divided by total possible score.

837 Table 1: Demographic information for all participants.

838 Table 2: Mood disorder symptom statistics. Mean and SD Beck Depression Inventory  
839 II (BDI) and Beck Anxiety Inventory (BAI) proportion scores (score divided by total  
840 possible score).

841 Table 3: Linear model analysis coefficients and standard errors for sensitivity ( $d'$ ) in  
842 avoidance. BAI (prop. score) = anxiety score on the Beck Anxiety Inventory. Proportion  
843 scores are scores divided by total possible score. AIC = Akaike information criterion, BIC =  
844 Bayesian information criterion, Log. Lik. = log likelihood, RMSE = root mean squared  
845 error.

846 Table 4: Linear model analysis coefficients and standard errors for sensitivity ( $d'$ ) in  
847 avoidance. BDI (prop. score) = depression score on the Beck Depression Inventory II.  
848 Proportion scores are scores divided by total possible score. AIC = Akaike information

849 criterion, BIC = Bayesian information criterion, Log. Lik. = log likelihood, RMSE = root  
850 mean squared error.

851 Table 5: Multi-level model analysis coefficients and standard errors for effort in  
852 avoidance. BAI (prop. score) = anxiety score on the Beck Anxiety Inventory. Proportion  
853 scores are scores divided by total possible score. AIC = Akaike information criterion, BIC =  
854 Bayesian information criterion, ICC = intraclass correlation, RMSE = root mean squared  
855 error.

856 Table 6: Multi-level model analysis coefficients and standard errors for effort in  
857 avoidance. BDI (prop. score) = depression score on the Beck Depression Inventory II.  
858 Proportion scores are scores divided by total possible score. AIC = Akaike information  
859 criterion, BIC = Bayesian information criterion, ICC = intraclass correlation, RMSE = root  
860 mean squared error.

861 Table 7: Linear model analysis coefficients and standard errors for breakpoint in  
862 avoidance. BAI (prop. score) = anxiety score on the Beck Anxiety Inventory. Proportion  
863 scores are scores divided by total possible score. AIC = Akaike information criterion, BIC =  
864 Bayesian information criterion, Log. Lik. = log likelihood, RMSE = root mean squared  
865 error.

866 Table 8: Linear model analysis coefficients and standard errors for breakpoint in  
867 avoidance. BDI (prop. score) = depression score on the Beck Depression Inventory II.  
868 Proportion scores are scores divided by total possible score. AIC = Akaike information  
869 criterion, BIC = Bayesian information criterion, Log. Lik. = log likelihood, RMSE = root  
870 mean squared error.

871 Table 9: Linear model analysis coefficients and standard errors for sensitivity ( $d'$ ) in  
872 reward-seeking. BAI (prop. score) = anxiety score on the Beck Anxiety Inventory.  
873 Proportion scores are scores divided by total possible score. AIC = Akaike information

874 criterion, BIC = Bayesian information criterion, Log. Lik. = log likelihood, RMSE = root  
875 mean squared error.

876 Table 10: Linear model analysis coefficients and standard errors for sensitivity ( $d'$ ) in  
877 reward-seeking. BDI (prop. score) = anxiety score on the Beck Depression Inventory II.  
878 Proportion scores are scores divided by total possible score. AIC = Akaike information  
879 criterion, BIC = Bayesian information criterion, Log. Lik. = log likelihood, RMSE = root  
880 mean squared error.

881 Table 11: Multi-level model analysis coefficients and standard errors for effort in  
882 reward-seeking. BAI (prop. score) = anxiety score on the Beck Anxiety Inventory.  
883 Proportion scores are scores divided by total possible score. AIC = Akaike information  
884 criterion, BIC = Bayesian information criterion, ICC = intraclass correlation, RMSE = root  
885 mean squared error.

886 Table 12: Multi-level model analysis coefficients and standard errors for effort in  
887 reward-seeking. BDI (prop. score) = depression score on the Beck Depression Inventory II.  
888 Proportion scores are scores divided by total possible score. AIC = Akaike information  
889 criterion, BIC = Bayesian information criterion, ICC = intraclass correlation, RMSE = root  
890 mean squared error.

891 Table 13: Linear model analysis coefficients and standard errors for breakpoint in  
892 reward-seeking. BAI (prop. score) = anxiety score on the Beck Anxiety Inventory.  
893 Proportion scores are scores divided by total possible score. AIC = Akaike information  
894 criterion, BIC = Bayesian information criterion, Log. Lik. = log likelihood, RMSE = root  
895 mean squared error.

896 Table 14: Linear model analysis coefficients and standard errors for breakpoint in  
897 reward-seeking. BDI (prop. score) = depression score on the Beck Depression Inventory II.  
898 Proportion scores are scores divided by total possible score. AIC = Akaike information

899 criterion, BIC = Bayesian information criterion, Log. Lik. = log likelihood, RMSE = root  
900 mean squared error.

**Table 1**

*Demographic information for all participants.*

| Study                              | N <sub>recruited</sub> | N <sub>analyzed</sub> | N <sub>female</sub> | N <sub>male</sub> | N <sub>other</sub> | M <sub>age</sub> | Range <sub>age</sub> |
|------------------------------------|------------------------|-----------------------|---------------------|-------------------|--------------------|------------------|----------------------|
| 1A (Avoidance, undergraduate)      |                        |                       | 357                 | 272               | 174                | 86               | 12 20.42 17-32       |
| 1B (Avoidance, paid global)        |                        |                       | 310                 | 272               | 87                 | 176              | 9 24.06 18-57        |
| 2A (Reward-seeking, undergraduate) |                        |                       | 114                 | 36                | 28                 | 8                | 0 20.67 18-26        |
| 2B (Reward-seeking, paid global)   |                        |                       | 309                 | 274               | 78                 | 180              | 16 25.18 18-62       |

**Table 2**

*Mean and SD Beck Depression Inventory II (BDI) and Beck Anxiety Inventory (BAI) proportion scores (score divided by total possible score).*

| Task           | Gender | $M_{BDIprop}$ | $SD_{BDIprop}$ | $M_{BAIprop}$ | $SD_{BAIprop}$ |
|----------------|--------|---------------|----------------|---------------|----------------|
| Avoidance      | Female | 0.30          | 0.19           | 0.29          | 0.22           |
|                | Male   | 0.23          | 0.16           | 0.23          | 0.19           |
| Reward-seeking | Female | 0.29          | 0.19           | 0.28          | 0.21           |
|                | Male   | 0.26          | 0.17           | 0.22          | 0.17           |

**Table 3**

*Linear model analysis coefficients and standard errors for sensitivity ( $d'$ ) in avoidance. BAI (prop. score) = anxiety score on the Beck Anxiety Inventory. Proportion scores are scores divided by total possible score. AIC = Akaike information criterion, BIC = Bayesian information criterion, Log. Lik. = log likelihood, RMSE = root mean squared error.*

|                                     | Linear model: BAI pred. Sensitivity ( $d'$ ) |
|-------------------------------------|----------------------------------------------|
| (Intercept)                         | 2.46***<br>(0.09)                            |
| BAI (prop. score)                   | -0.94***<br>(0.23)                           |
| Gender                              | -0.07<br>(0.11)                              |
| Sample                              | -0.17<br>(0.11)                              |
| BAI (prop. score) x Gender          | 0.74*<br>(0.31)                              |
| BAI (prop. score) x Sample          | 0.73*<br>(0.29)                              |
| Gender x Sample                     | 0.06<br>(0.15)                               |
| BAI (prop. score) x Gender x Sample | -0.69<br>(0.46)                              |
| Num.Obs.                            | 523                                          |
| R <sup>2</sup>                      | 0.050                                        |
| R <sup>2</sup> Adj.                 | 0.037                                        |
| AIC                                 | 769.8                                        |
| BIC                                 | 808.2                                        |
| Log.Lik.                            | -375.910                                     |
| F                                   | 3.893                                        |
| RMSE                                | 0.50                                         |

+  $p < 0.1$ , \*  $p < 0.05$ , \*\*  $p < 0.01$ , \*\*\*  $p < 0.001$



**Table 4**

*Linear model analysis coefficients and standard errors for sensitivity (d')* in avoidance. *BDI (prop. score)* = depression score on the Beck Depression Inventory II. *Proportion scores* are scores divided by total possible score. *AIC* = Akaike information criterion, *BIC* = Bayesian information criterion, *Log. Lik.* = log likelihood, *RMSE* = root mean squared error.

|                                     | Linear model: BDI pred. Sensitivity (d') |
|-------------------------------------|------------------------------------------|
| (Intercept)                         | 2.52***<br>(0.11)                        |
| BDI (prop. score)                   | -1.09***<br>(0.29)                       |
| Gender                              | -0.13<br>(0.13)                          |
| Sample                              | -0.29*<br>(0.13)                         |
| BDI (prop. score) x Gender          | 0.88*<br>(0.38)                          |
| BDI (prop. score) x Sample          | 1.11**<br>(0.35)                         |
| Gender x Sample                     | 0.16<br>(0.17)                           |
| BDI (prop. score) x Gender x Sample | -0.93+<br>(0.53)                         |
| Num.Obs.                            | 523                                      |
| R2                                  | 0.042                                    |
| R2 Adj.                             | 0.029                                    |
| AIC                                 | 774.1                                    |
| BIC                                 | 812.4                                    |
| Log.Lik.                            | -378.038                                 |
| F                                   | 3.265                                    |
| RMSE                                | 0.50                                     |

+ p < 0.1, \* p < 0.05, \*\* p < 0.01, \*\*\* p < 0.001

**Table 5**

*Multi-level model analysis coefficients and standard errors for effort in avoidance. BAI (prop. score) = anxiety score on the Beck Anxiety Inventory. Proportion scores are scores divided by total possible score. AIC = Akaike information criterion, BIC = Bayesian information criterion, ICC = intraclass correlation, RMSE = root mean squared error.*

|                                             | Multi-level model: BAI pred. Effort |
|---------------------------------------------|-------------------------------------|
| (Intercept)                                 | 5.74***<br>(0.26)                   |
| BAI (prop. score)                           | -0.63<br>(0.68)                     |
| Block                                       | -0.91***<br>(0.02)                  |
| Gender                                      | 0.29<br>(0.32)                      |
| Sample                                      | -0.42<br>(0.33)                     |
| BAI (prop. score) x Block                   | 0.16***<br>(0.05)                   |
| BAI (prop. score) x Gender                  | 0.97<br>(0.92)                      |
| Block x Gender                              | 0.04*<br>(0.02)                     |
| BAI (prop. score) x Sample                  | -0.65<br>(0.87)                     |
| Block x Sample                              | -0.01<br>(0.03)                     |
| Gender x Sample                             | -0.19<br>(0.44)                     |
| BAI (prop. score) x Block x Gender          | -0.19**<br>(0.06)                   |
| BAI (prop. score) x Block x Sample          | -0.06<br>(0.07)                     |
| BAI (prop. score) x Gender x Sample         | 0.94<br>(1.36)                      |
| Block x Gender x Sample                     | 0.04<br>(0.04)                      |
| BAI (prop. score) x Block x Gender x Sample | -0.08<br>(0.11)                     |
| SD (Intercept participant)                  | 1.42                                |
| SD (Observations)                           | 1.91                                |
| Num.Obs.                                    | 52261                               |
| R2 Marg.                                    | 0.289                               |
| R2 Cond.                                    | 0.542                               |
| AIC                                         | 218248.5                            |
| BIC                                         | 218408.1                            |
| ICC                                         | 0.4                                 |
| RMSE                                        | 1.90                                |

+ p < 0.1, \* p < 0.05, \*\* p < 0.01, \*\*\* p < 0.001

**Table 6**

*Multi-level model analysis coefficients and standard errors for effort in avoidance. BDI (prop. score) = depression score on the Beck Depression Inventory II. Proportion scores are scores divided by total possible score. AIC = Akaike information criterion, BIC = Bayesian information criterion, ICC = intraclass correlation, RMSE = root mean squared error.*

|                                             | Multi-level model: BDI pred. Effort |
|---------------------------------------------|-------------------------------------|
| (Intercept)                                 | 5.67***<br>(0.32)                   |
| BDI (prop. score)                           | -0.41<br>(0.86)                     |
| Block                                       | -0.92***<br>(0.02)                  |
| Gender                                      | 0.24<br>(0.38)                      |
| Sample                                      | -0.40<br>(0.38)                     |
| BDI (prop. score) x Block                   | 0.19**<br>(0.06)                    |
| BDI (prop. score) x Gender                  | 1.21<br>(1.11)                      |
| Block x Gender                              | 0.08**<br>(0.03)                    |
| BDI (prop. score) x Sample                  | -0.70<br>(1.04)                     |
| Block x Sample                              | 0.01<br>(0.03)                      |
| Gender x Sample                             | -0.31<br>(0.50)                     |
| BDI (prop. score) x Block x Gender          | -0.34***<br>(0.08)                  |
| BDI (prop. score) x Block x Sample          | -0.12<br>(0.08)                     |
| BDI (prop. score) x Gender x Sample         | 1.54<br>(1.59)                      |
| Block x Gender x Sample                     | -0.01<br>(0.04)                     |
| BDI (prop. score) x Block x Gender x Sample | 0.12<br>(0.13)                      |
| SD (Intercept participant)                  | 1.42                                |
| SD (Observations)                           | 1.91                                |
| Num.Obs.                                    | 52261                               |
| R2 Marg.                                    | 0.289                               |
| R2 Cond.                                    | 0.542                               |
| AIC                                         | 218241.9                            |
| BIC                                         | 218401.4                            |
| ICC                                         | 0.4                                 |
| RMSE                                        | 1.90                                |

+ p < 0.1, \* p < 0.05, \*\* p < 0.01, \*\*\* p < 0.001

**Table 7**

*Linear model analysis coefficients and standard errors for breakpoint in avoidance. BAI (prop. score) = anxiety score on the Beck Anxiety Inventory. Proportion scores are scores divided by total possible score. AIC = Akaike information criterion, BIC = Bayesian information criterion, Log. Lik. = log likelihood, RMSE = root mean squared error.*

|                                     | Linear model: BAI pred. Sensitivity (d') |
|-------------------------------------|------------------------------------------|
| (Intercept)                         | 133.41***<br>(7.78)                      |
| BAI (prop. score)                   | -18.55<br>(20.00)                        |
| Gender                              | 12.52<br>(9.52)                          |
| Sample                              | -5.39<br>(9.53)                          |
| BAI (prop. score) x Gender          | 42.11<br>(27.05)                         |
| BAI (prop. score) x Sample          | -12.37<br>(25.25)                        |
| Gender x Sample                     | 5.42<br>(12.91)                          |
| BAI (prop. score) x Gender x Sample | -30.85<br>(39.58)                        |
| Num.Obs.                            | 523                                      |
| R <sup>2</sup>                      | 0.105                                    |
| R <sup>2</sup> Adj.                 | 0.093                                    |
| AIC                                 | 5440.4                                   |
| BIC                                 | 5478.7                                   |
| Log.Lik.                            | -2711.198                                |
| F                                   | 8.668                                    |
| RMSE                                | 43.16                                    |

+ p < 0.1, \* p < 0.05, \*\* p < 0.01, \*\*\* p < 0.001

**Table 8**

*Linear model analysis coefficients and standard errors for breakpoint in avoidance. BDI (prop. score) = depression score on the Beck Depression Inventory II. Proportion scores are scores divided by total possible score. AIC = Akaike information criterion, BIC = Bayesian information criterion, Log. Lik. = log likelihood, RMSE = root mean squared error.*

|                                     | Linear model: BDI pred. Sensitivity (d') |
|-------------------------------------|------------------------------------------|
| (Intercept)                         | 136.99***<br>(9.46)                      |
| BDI (prop. score)                   | -28.79<br>(25.30)                        |
| Gender                              | 11.13<br>(11.28)                         |
| Sample                              | -10.46<br>(11.10)                        |
| BDI (prop. score) x Gender          | 42.87<br>(32.83)                         |
| BDI (prop. score) x Sample          | 2.96<br>(30.35)                          |
| Gender x Sample                     | 0.59<br>(14.72)                          |
| BDI (prop. score) x Gender x Sample | 1.39<br>(46.40)                          |
| Num.Obs.                            | 523                                      |
| R2                                  | 0.101                                    |
| R2 Adj.                             | 0.089                                    |
| AIC                                 | 5443.1                                   |
| BIC                                 | 5481.4                                   |
| Log.Lik.                            | -2712.530                                |
| F                                   | 8.250                                    |
| RMSE                                | 43.27                                    |

+ p < 0.1, \* p < 0.05, \*\* p < 0.01, \*\*\* p < 0.001

**Table 9**

*Linear model analysis coefficients and standard errors for sensitivity (d') in reward-seeking. BAI (prop. score) = anxiety score on the Beck Anxiety Inventory. Proportion scores are scores divided by total possible score. AIC = Akaike information criterion, BIC = Bayesian information criterion, Log. Lik. = log likelihood, RMSE = root mean squared error.*

|                                     | Linear model: BAI pred. Sensitivity (d') |
|-------------------------------------|------------------------------------------|
| (Intercept)                         | 3.12***<br>(0.15)                        |
| BAI (prop. score)                   | -0.16<br>(0.40)                          |
| Gender                              | 0.34*<br>(0.17)                          |
| Sample                              | 0.15<br>(0.27)                           |
| BAI (prop. score) x Gender          | -0.75<br>(0.52)                          |
| BAI (prop. score) x Sample          | -0.48<br>(0.84)                          |
| Gender x Sample                     | -0.53<br>(0.42)                          |
| BAI (prop. score) x Gender x Sample | 3.16<br>(2.69)                           |
| Num.Obs.                            | 294                                      |
| R2                                  | 0.041                                    |
| R2 Adj.                             | 0.017                                    |
| AIC                                 | 686.9                                    |
| BIC                                 | 720.1                                    |
| Log.Lik.                            | -334.458                                 |
| F                                   | 1.739                                    |
| RMSE                                | 0.75                                     |

+ p < 0.1, \* p < 0.05, \*\* p < 0.01, \*\*\* p < 0.001

**Table 10**

*Linear model analysis coefficients and standard errors for sensitivity (d') in reward-seeking. BDI (prop. score) = depression score on the Beck Depression Inventory II. Proportion scores are scores divided by total possible score. AIC = Akaike information criterion, BIC = Bayesian information criterion, Log. Lik. = log likelihood, RMSE = root mean squared error.*

|                                     | Linear model: BDI pred. Sensitivity (d') |
|-------------------------------------|------------------------------------------|
| (Intercept)                         | 3.09***<br>(0.16)                        |
| BDI (prop. score)                   | -0.05<br>(0.46)                          |
| Gender                              | 0.26<br>(0.20)                           |
| Sample                              | 0.07<br>(0.30)                           |
| BDI (prop. score) x Gender          | -0.28<br>(0.58)                          |
| BDI (prop. score) x Sample          | -0.15<br>(0.92)                          |
| Gender x Sample                     | -0.35<br>(0.50)                          |
| BDI (prop. score) x Gender x Sample | 1.27<br>(2.13)                           |
| Num.Obs.                            | 294                                      |
| R2                                  | 0.016                                    |
| R2 Adj.                             | -0.008                                   |
| AIC                                 | 694.5                                    |
| BIC                                 | 727.6                                    |
| Log.Lik.                            | -338.246                                 |
| F                                   | 0.655                                    |
| RMSE                                | 0.76                                     |

+ p < 0.1, \* p < 0.05, \*\* p < 0.01, \*\*\* p < 0.001

**Table 11**

*Multi-level model analysis coefficients and standard errors for effort in reward-seeking. BAI (prop. score) = anxiety score on the Beck Anxiety Inventory. Proportion scores are scores divided by total possible score. AIC = Akaike information criterion, BIC = Bayesian information criterion, ICC = intraclass correlation, RMSE = root mean squared error.*

|                                             | Multi-level model: BAI pred. Effort |
|---------------------------------------------|-------------------------------------|
| (Intercept)                                 | 5.27***<br>(0.26)                   |
| BAI (prop. score)                           | 1.44*<br>(0.71)                     |
| Block                                       | -0.87***<br>(0.02)                  |
| Gender                                      | 1.30***<br>(0.31)                   |
| Sample                                      | 1.08*<br>(0.49)                     |
| BAI (prop. score) x Block                   | 0.00<br>(0.05)                      |
| BAI (prop. score) x Gender                  | -3.35***<br>(0.93)                  |
| Block x Gender                              | -0.03<br>(0.02)                     |
| BAI (prop. score) x Sample                  | -2.92+<br>(1.52)                    |
| Block x Sample                              | -0.12**<br>(0.04)                   |
| Gender x Sample                             | -2.05**<br>(0.76)                   |
| BAI (prop. score) x Block x Gender          | 0.15*<br>(0.07)                     |
| BAI (prop. score) x Block x Sample          | 0.39**<br>(0.13)                    |
| BAI (prop. score) x Gender x Sample         | 3.62<br>(4.81)                      |
| Block x Gender x Sample                     | 0.22***<br>(0.06)                   |
| BAI (prop. score) x Block x Gender x Sample | -0.79+<br>(0.42)                    |
| SD (Intercept participant)                  | 1.30                                |
| SD (Observations)                           | 1.98                                |
| Num.Obs.                                    | 37677                               |
| R2 Marg.                                    | 0.282                               |
| R2 Cond.                                    | 0.498                               |
| AIC                                         | 159770.0                            |
| BIC                                         | 159923.7                            |
| ICC                                         | 0.3                                 |
| RMSE                                        | 1.98                                |

+ p < 0.1, \* p < 0.05, \*\* p < 0.01, \*\*\* p < 0.001



**Table 12**

*Multi-level model analysis coefficients and standard errors for effort in reward-seeking. BDI (prop. score) = depression score on the Beck Depression Inventory II. Proportion scores are scores divided by total possible score. AIC = Akaike information criterion, BIC = Bayesian information criterion, ICC = intraclass correlation, RMSE = root mean squared error.*

|                                             | Multi-level model: BDI pred. Effort |
|---------------------------------------------|-------------------------------------|
| (Intercept)                                 | 5.64***<br>(0.29)                   |
| BDI (prop. score)                           | 0.15<br>(0.82)                      |
| Block                                       | -0.88***<br>(0.02)                  |
| Gender                                      | 0.73*<br>(0.35)                     |
| Sample                                      | 0.44<br>(0.53)                      |
| BDI (prop. score) x Block                   | 0.03<br>(0.06)                      |
| BDI (prop. score) x Gender                  | -1.01<br>(1.03)                     |
| Block x Gender                              | 0.01<br>(0.03)                      |
| BDI (prop. score) x Sample                  | -0.51<br>(1.64)                     |
| Block x Sample                              | -0.07<br>(0.04)                     |
| Gender x Sample                             | -1.29<br>(0.89)                     |
| BDI (prop. score) x Block x Gender          | 0.00<br>(0.08)                      |
| BDI (prop. score) x Block x Sample          | 0.17<br>(0.13)                      |
| BDI (prop. score) x Gender x Sample         | 1.45<br>(3.81)                      |
| Block x Gender x Sample                     | 0.14+<br>(0.07)                     |
| BDI (prop. score) x Block x Gender x Sample | -0.25<br>(0.32)                     |
| SD (Intercept participant)                  | 1.32                                |
| SD (Observations)                           | 1.98                                |
| Num.Obs.                                    | 37677                               |
| R2 Marg.                                    | 0.276                               |
| R2 Cond.                                    | 0.499                               |
| AIC                                         | 159796.9                            |
| BIC                                         | 159950.6                            |
| ICC                                         | 0.3                                 |
| RMSE                                        | 1.98                                |

+ p < 0.1, \* p < 0.05, \*\* p < 0.01, \*\*\* p < 0.001

**Table 13**

*Linear model analysis coefficients and standard errors for breakpoint in reward-seeking. BAI (prop. score) = anxiety score on the Beck Anxiety Inventory. Proportion scores are scores divided by total possible score. AIC = Akaike information criterion, BIC = Bayesian information criterion, Log. Lik. = log likelihood, RMSE = root mean squared error.*

|                                     | Linear model: BAI pred. Sensitivity (d') |
|-------------------------------------|------------------------------------------|
| (Intercept)                         | 113.69***<br>(3.21)                      |
| BAI (prop. score)                   | 7.21<br>(8.83)                           |
| Gender                              | 6.73+<br>(3.84)                          |
| Sample                              | -2.79<br>(6.05)                          |
| BAI (prop. score) x Gender          | -13.91<br>(11.57)                        |
| BAI (prop. score) x Sample          | 9.61<br>(18.66)                          |
| Gender x Sample                     | 3.79<br>(9.34)                           |
| BAI (prop. score) x Gender x Sample | -3.59<br>(59.57)                         |
| Num.Obs.                            | 294                                      |
| R2                                  | 0.019                                    |
| R2 Adj.                             | -0.005                                   |
| AIC                                 | 2507.8                                   |
| BIC                                 | 2540.9                                   |
| Log.Lik.                            | -1244.881                                |
| F                                   | 0.786                                    |
| RMSE                                | 16.70                                    |

+ p < 0.1, \* p < 0.05, \*\* p < 0.01, \*\*\* p < 0.001

**Table 14**

*Linear model analysis coefficients and standard errors for breakpoint in reward-seeking. BDI (prop. score) = depression score on the Beck Depression Inventory II. Proportion scores are scores divided by total possible score. AIC = Akaike information criterion, BIC = Bayesian information criterion, Log. Lik. = log likelihood, RMSE = root mean squared error.*

|                                     | Linear model: BDI pred. Sensitivity (d') |
|-------------------------------------|------------------------------------------|
| (Intercept)                         | 114.96***<br>(3.56)                      |
| BDI (prop. score)                   | 2.79<br>(10.06)                          |
| Gender                              | 6.66<br>(4.30)                           |
| Sample                              | -3.31<br>(6.45)                          |
| BDI (prop. score) x Gender          | -12.94<br>(12.64)                        |
| BDI (prop. score) x Sample          | 10.64<br>(20.01)                         |
| Gender x Sample                     | 3.16<br>(10.88)                          |
| BDI (prop. score) x Gender x Sample | -1.17<br>(46.44)                         |
| Num.Obs.                            | 294                                      |
| R2                                  | 0.019                                    |
| R2 Adj.                             | -0.005                                   |
| AIC                                 | 2507.8                                   |
| BIC                                 | 2541.0                                   |
| Log.Lik.                            | -1244.920                                |
| F                                   | 0.775                                    |
| RMSE                                | 16.70                                    |

+ p < 0.1, \* p < 0.05, \*\* p < 0.01, \*\*\* p < 0.001

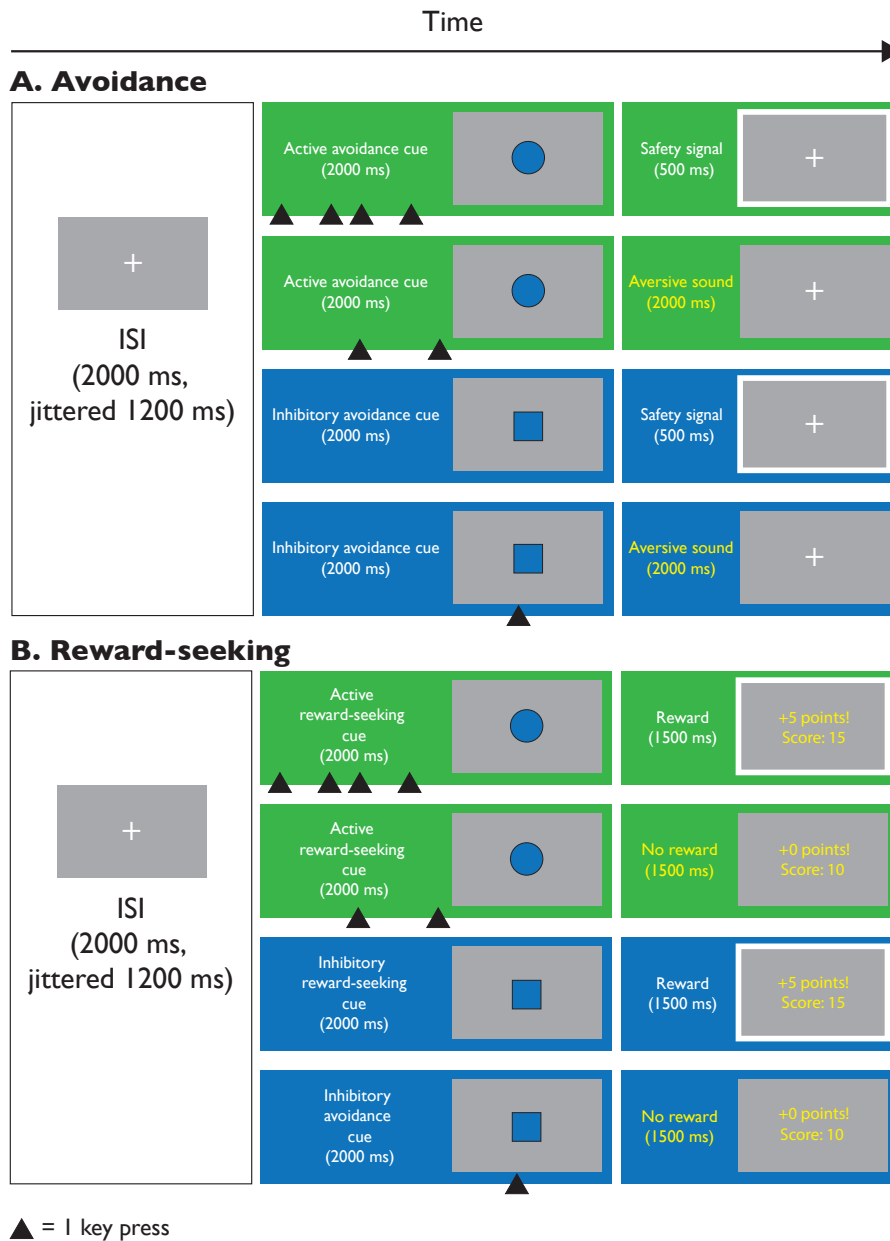

**Figure 1**

A diagram of the active and inhibitory avoidance and reward-seeking tasks. In the avoidance task (A), after an inter-stimulus interval (ISI) with a fixation cross onscreen, participants were presented with a cue associated with active or inhibitory avoidance. For the active avoidance cue, participants had to respond with repeated spacebar presses to avoid hearing an aversive sound. For the inhibitory avoidance cue, participants had to withhold responding to avoid hearing an aversive sound. In the reward-seeking task (B), after the ISI, participants were presented with a cue associated with active or inhibitory reward-seeking. For the active reward-seeking cue, participants had to respond with repeated spacebar presses to obtain points towards a monetary reward. For the inhibitory reward-seeking cue, participants had to withhold responding to obtain points towards a monetary reward. ISI = Inter-stimulus interval.

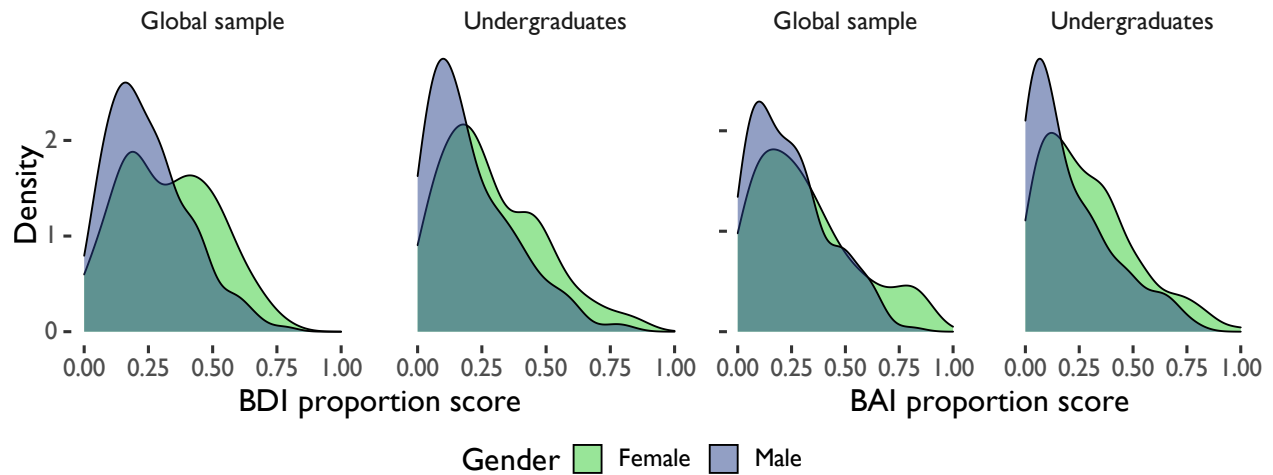

**Figure 2**

*Avoidance demographics: Distribution of anxiety (BAI) and depressive symptom (BDI) proportion scores (score divided by total possible score) by gender and sample. BAI = Beck Anxiety Inventory, BDI = Beck Depression Inventory.*

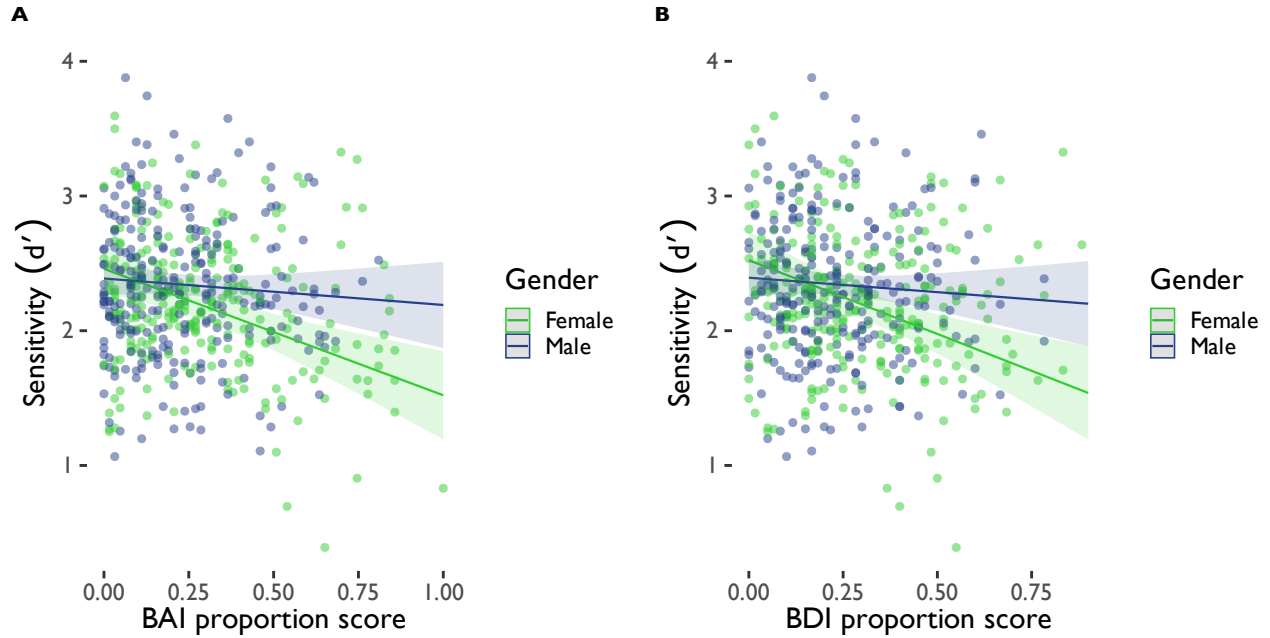

**Figure 3**

*Linear models revealed gender interacted with anxiety and depression scores to predict avoidance task performance. (A) Gender interacted with anxiety scores (BAI proportion scores) to explain sensitivity ( $d'$ ) in the avoidance task. (B) Gender interacted with depression scores (BDI proportion scores) to explain sensitivity ( $d'$ ) in the avoidance task. BAI = Beck Anxiety Inventory. BDI = Beck Depression Inventory II. Proportion scores are scores divided by total possible score.*

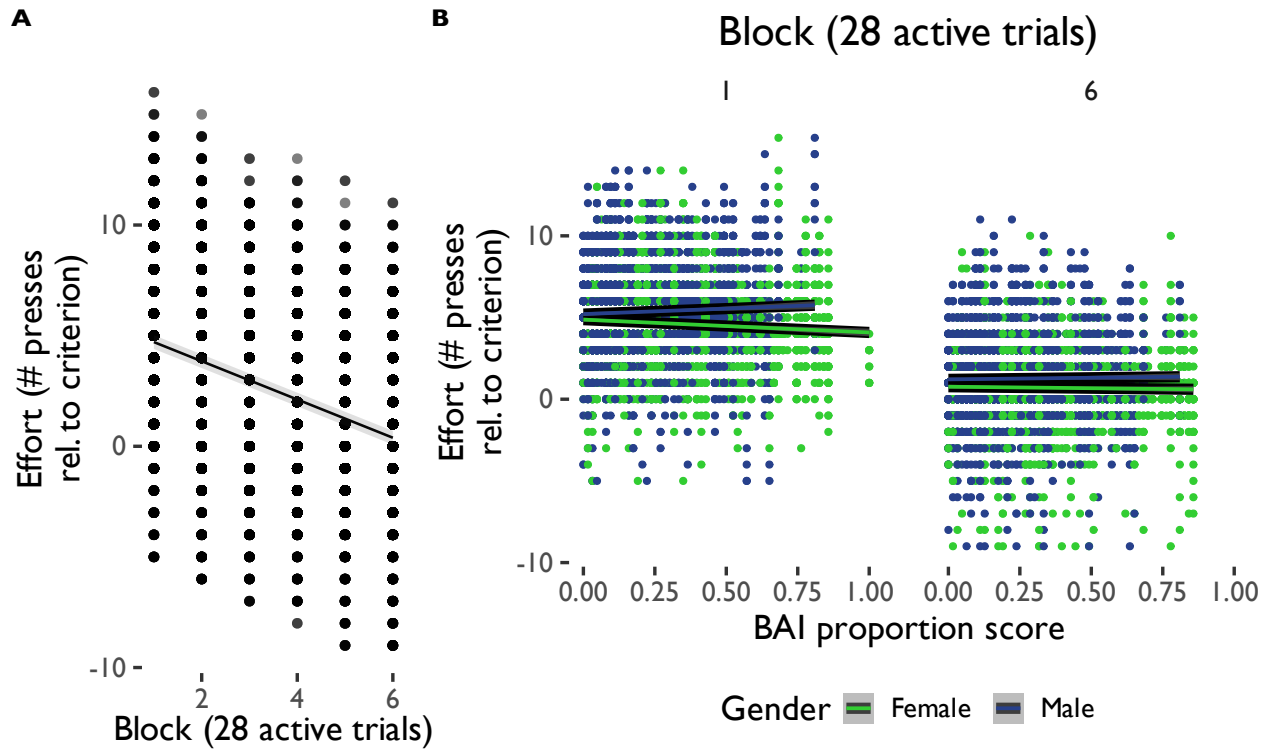

**Figure 4**

*Avoidance effort deployment. (A) Multi-level model significant effects and interactions for effort in avoidance. Effort decreased relative to criterion as the avoidance task progressed. (B) Effort deployment interacted with anxiety scores (BAI) and gender. Proportion scores are scores divided by total possible score.*

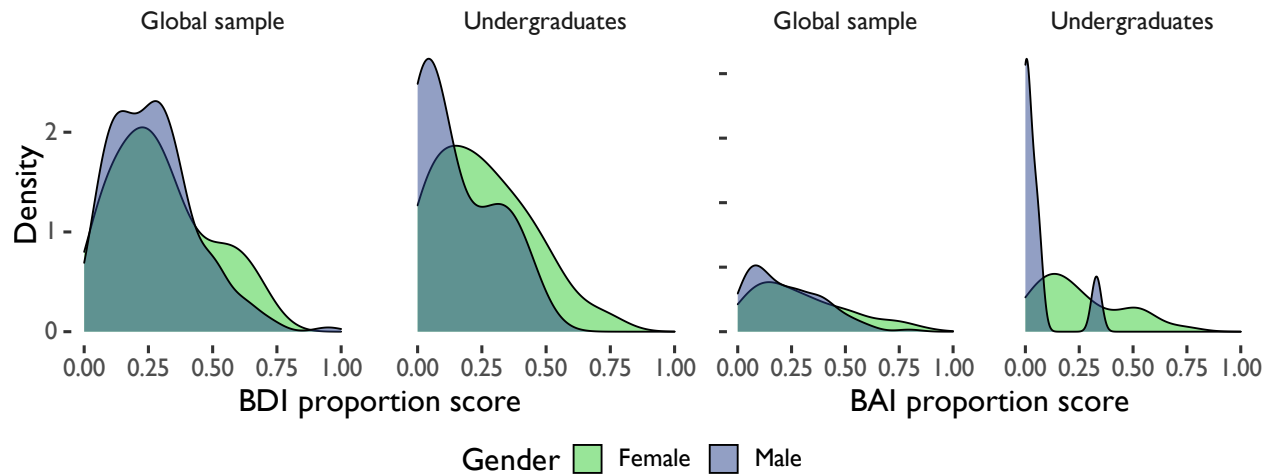

**Figure 5**

*Reward-seeking demographics: Distribution of anxiety (BAI) and depressive symptom (BDI) scores by gender and sample. BAI = Beck Anxiety Inventory, BDI = Beck Depression Inventory II.*



GENDER AND EFFORTFUL AVOIDANCE

57

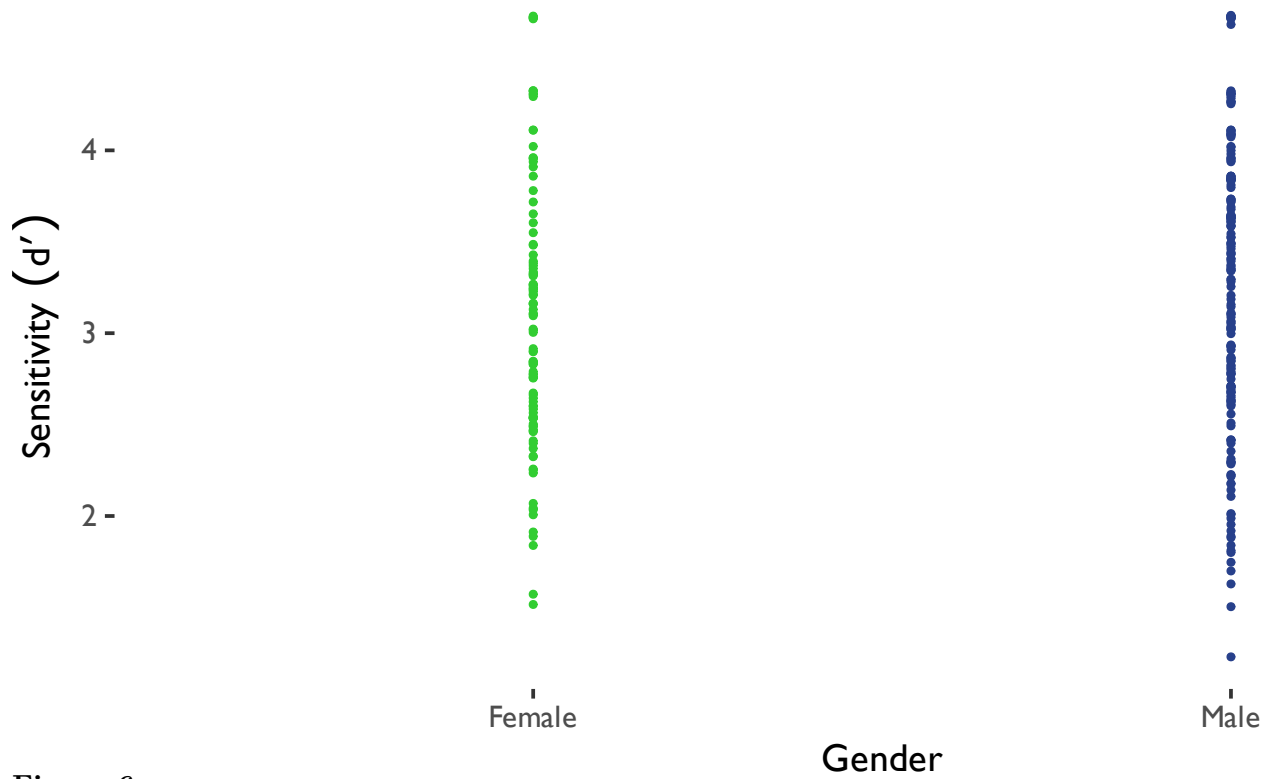

**Figure 6**

*Linear model significant effects for sensitivity in reward-seeking. Gender explained sensitivity ( $d'$ ) in the reward-seeking task. BAI = Beck Anxiety Inventory. Proportion scores are scores divided by total possible score.*

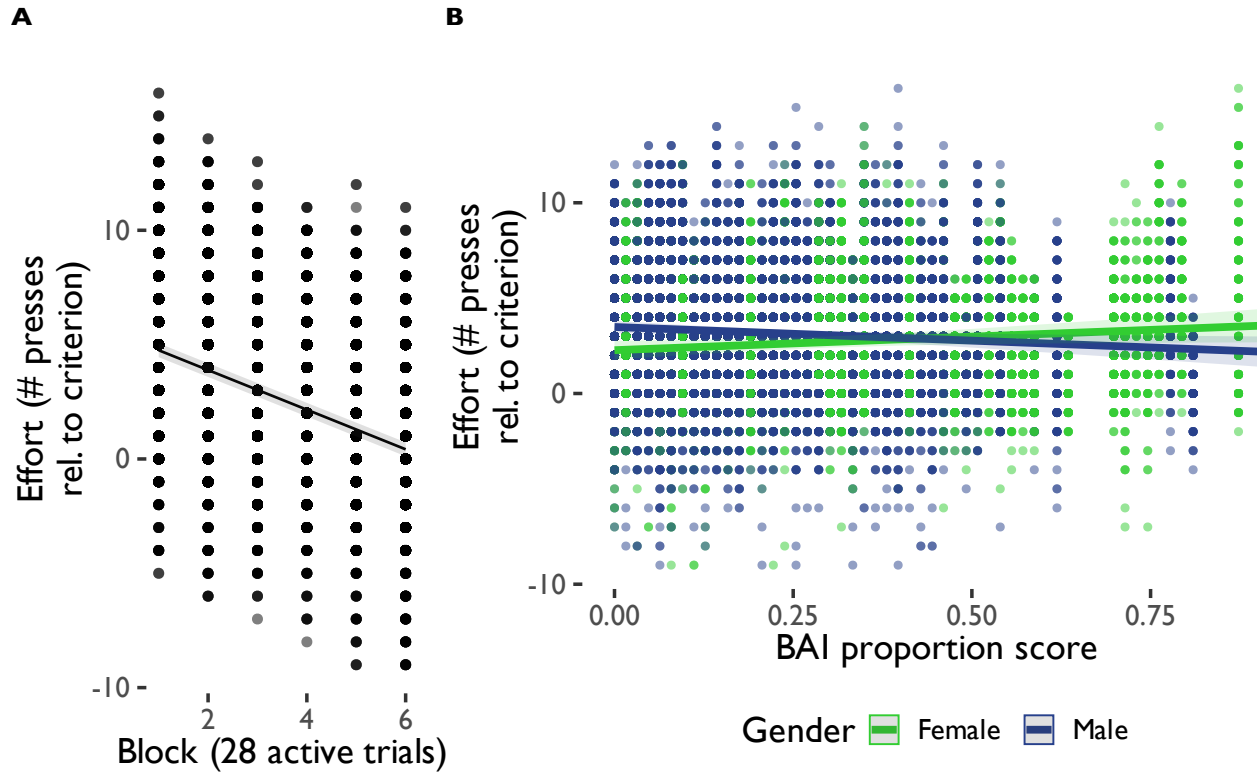

**Figure 7**

*Reward-seeking effort deployment. (A) Multi-level model significant effects and interactions for effort in reward-seeking. Effort decreased relative to criterion as the reward-seeking task progressed, an effect that (B) interacted with anxiety scores (BAI) and gender. Proportion scores are scores divided by total possible score.*

Time →

## A. Avoidance

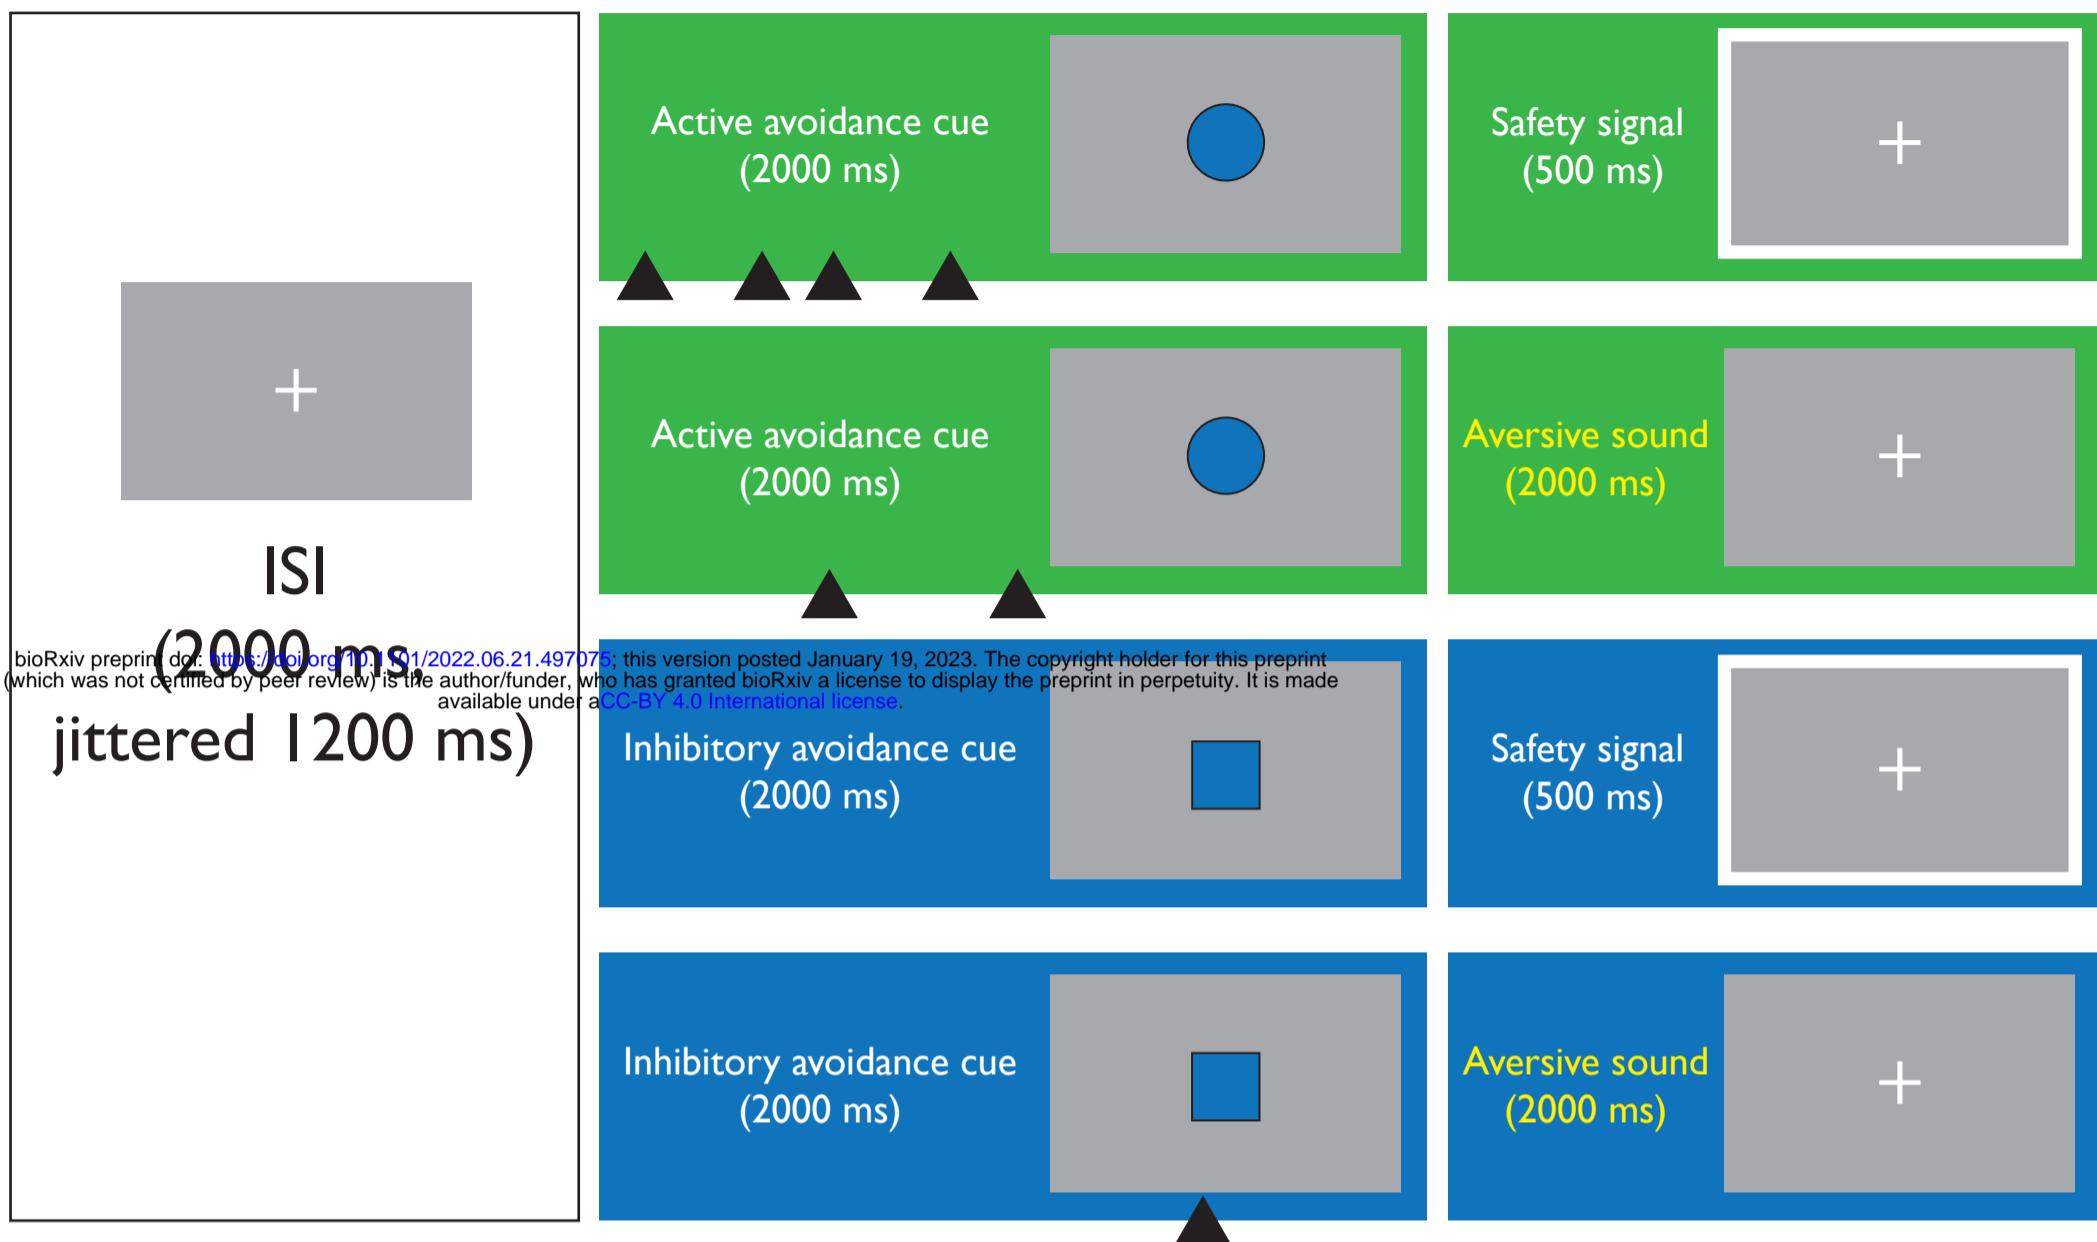

## B. Reward-seeking

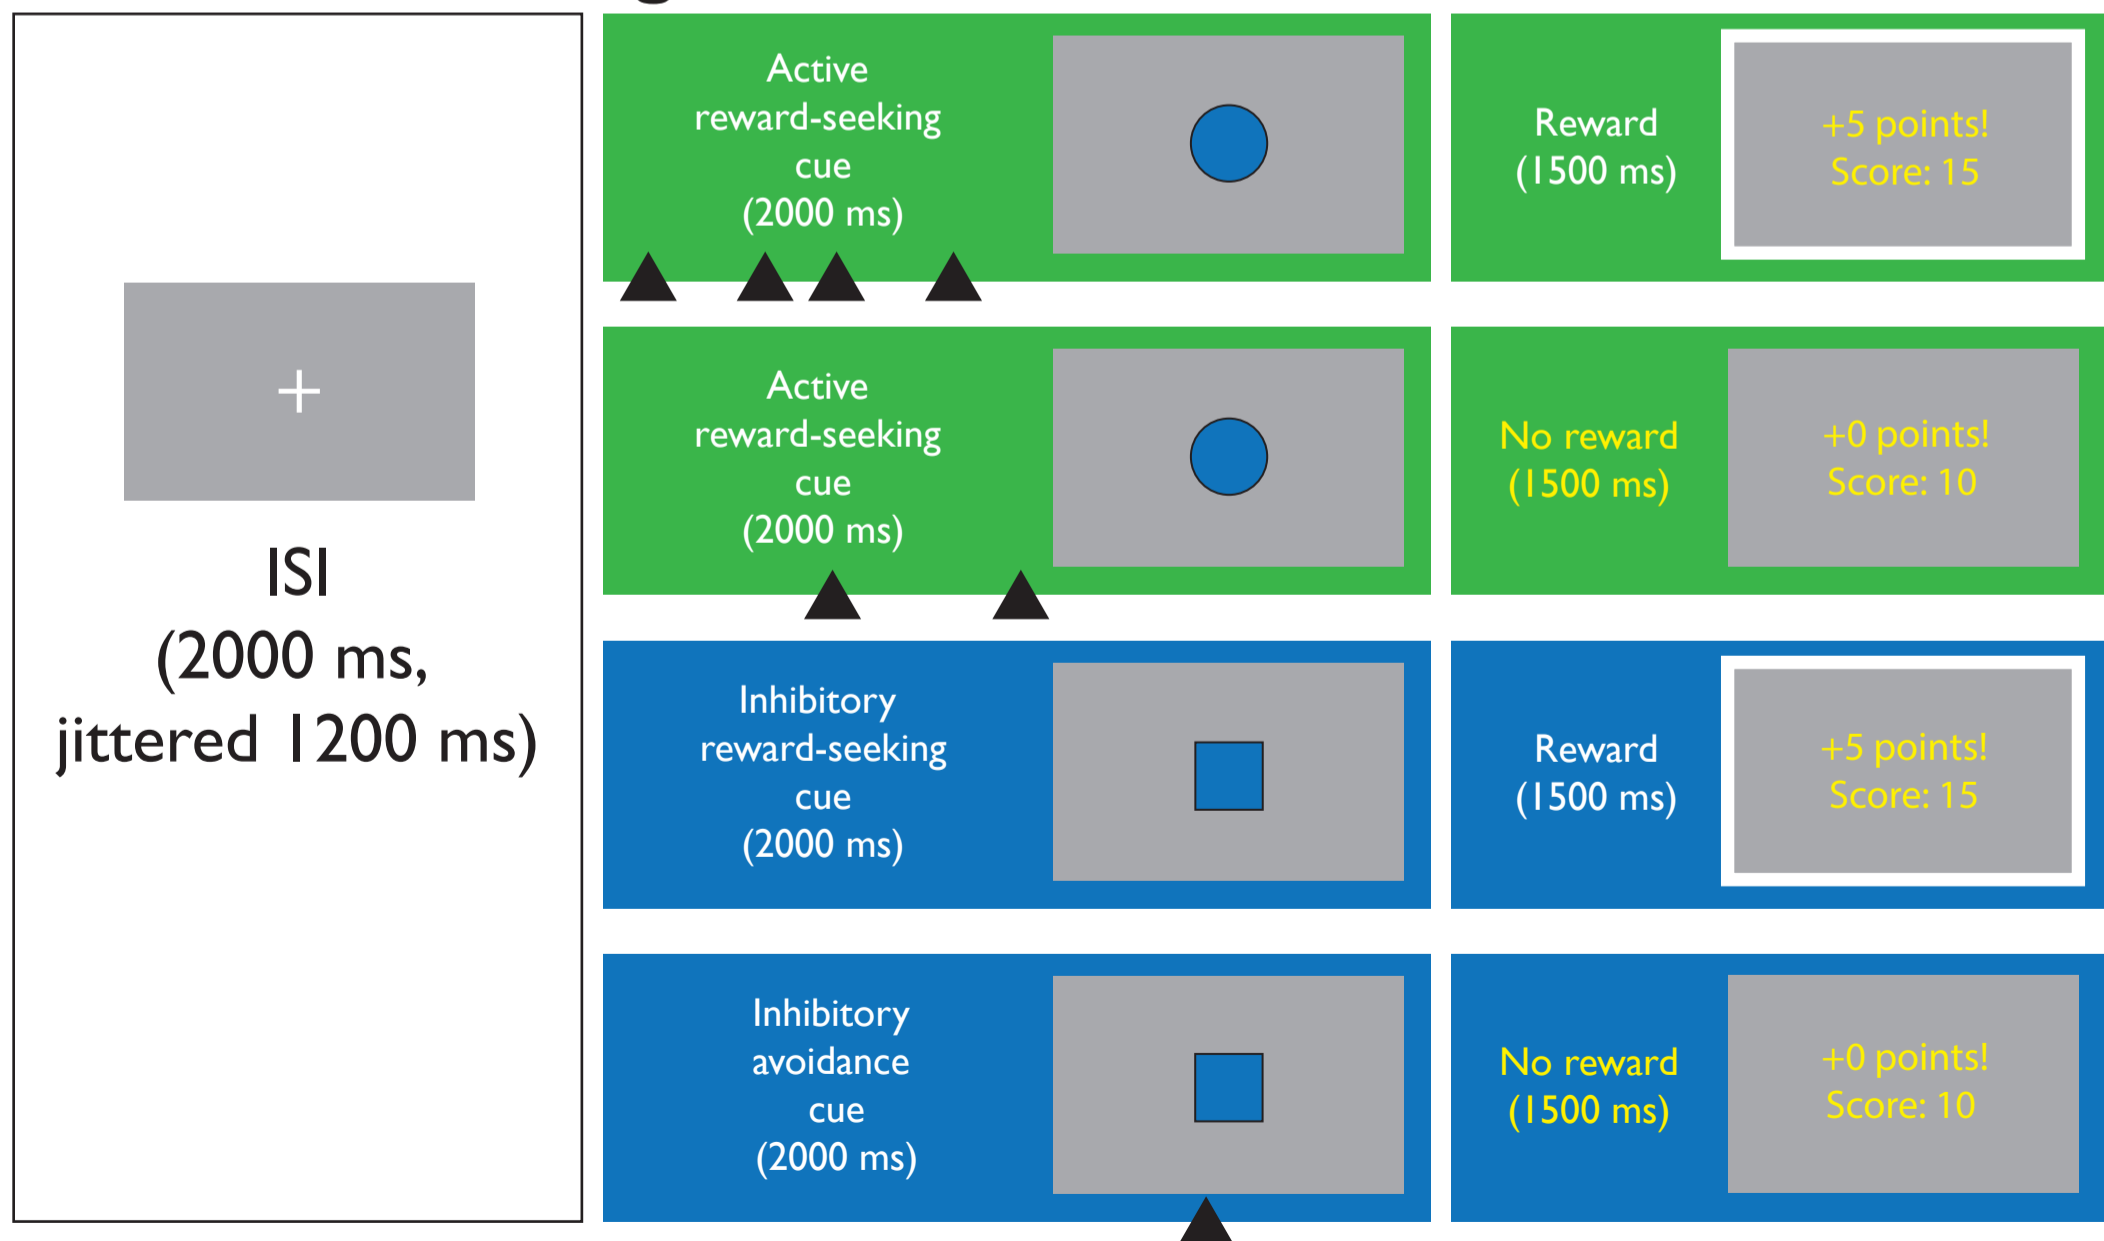

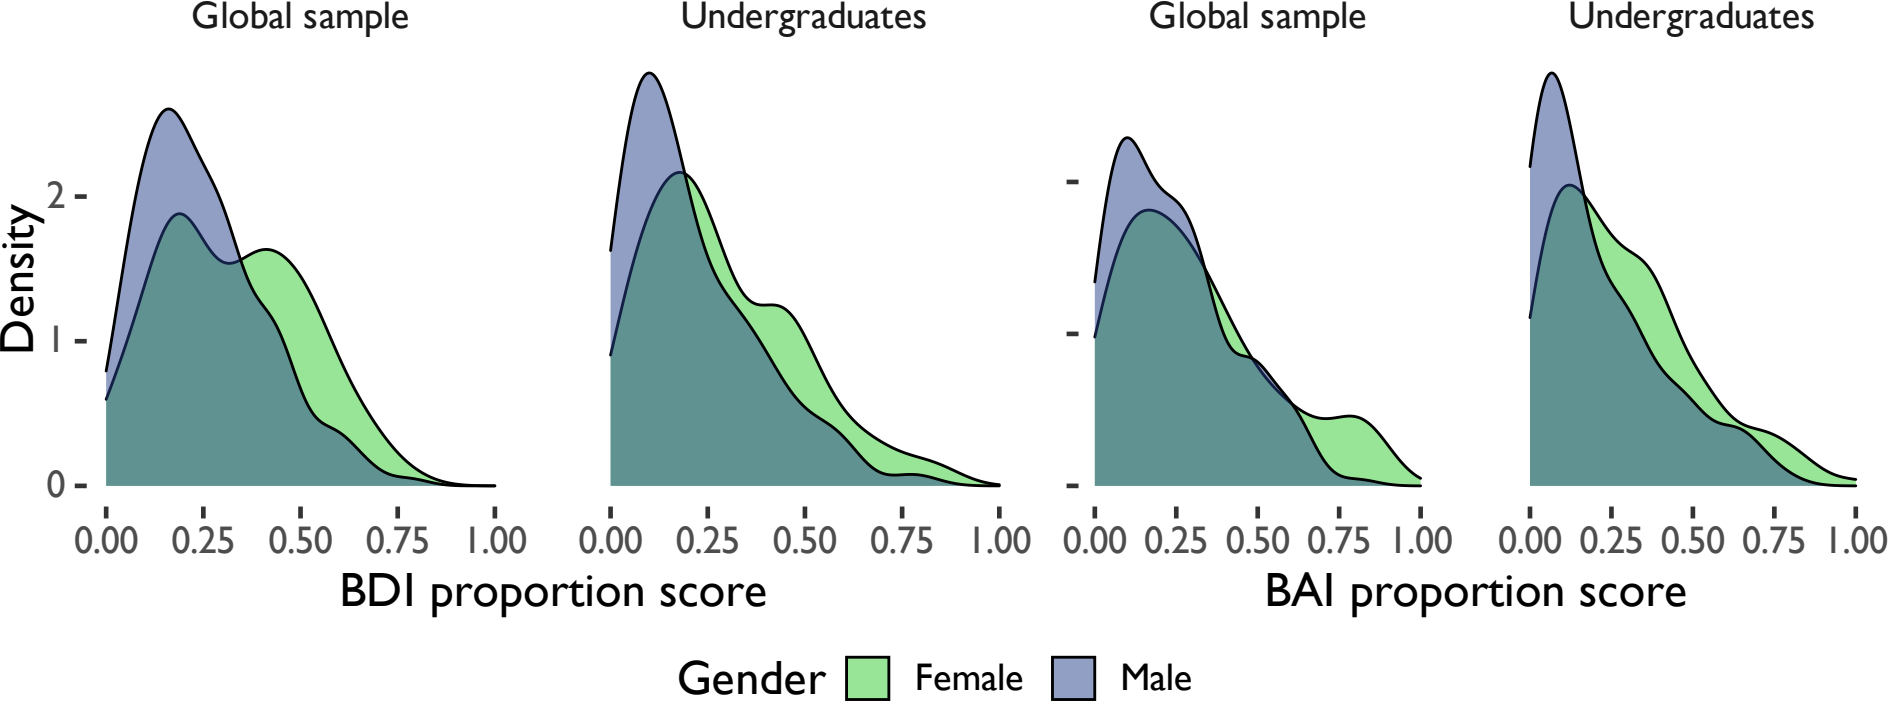

**A**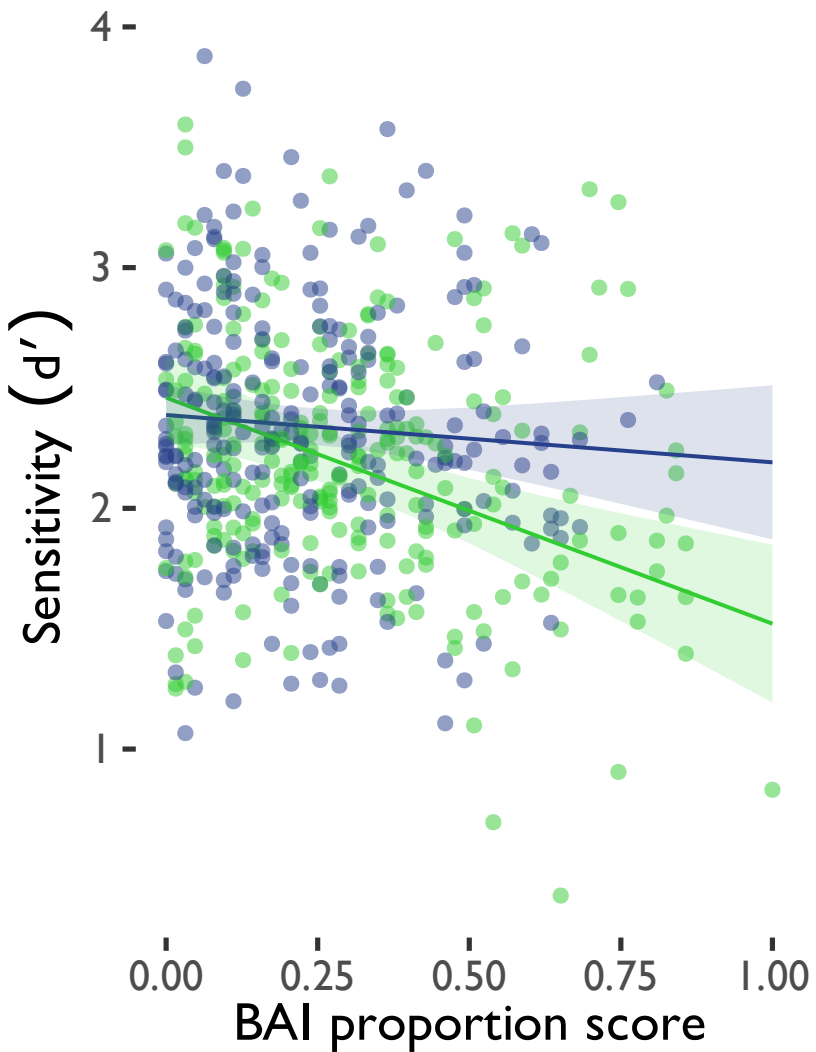**Gender**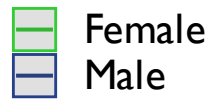**B**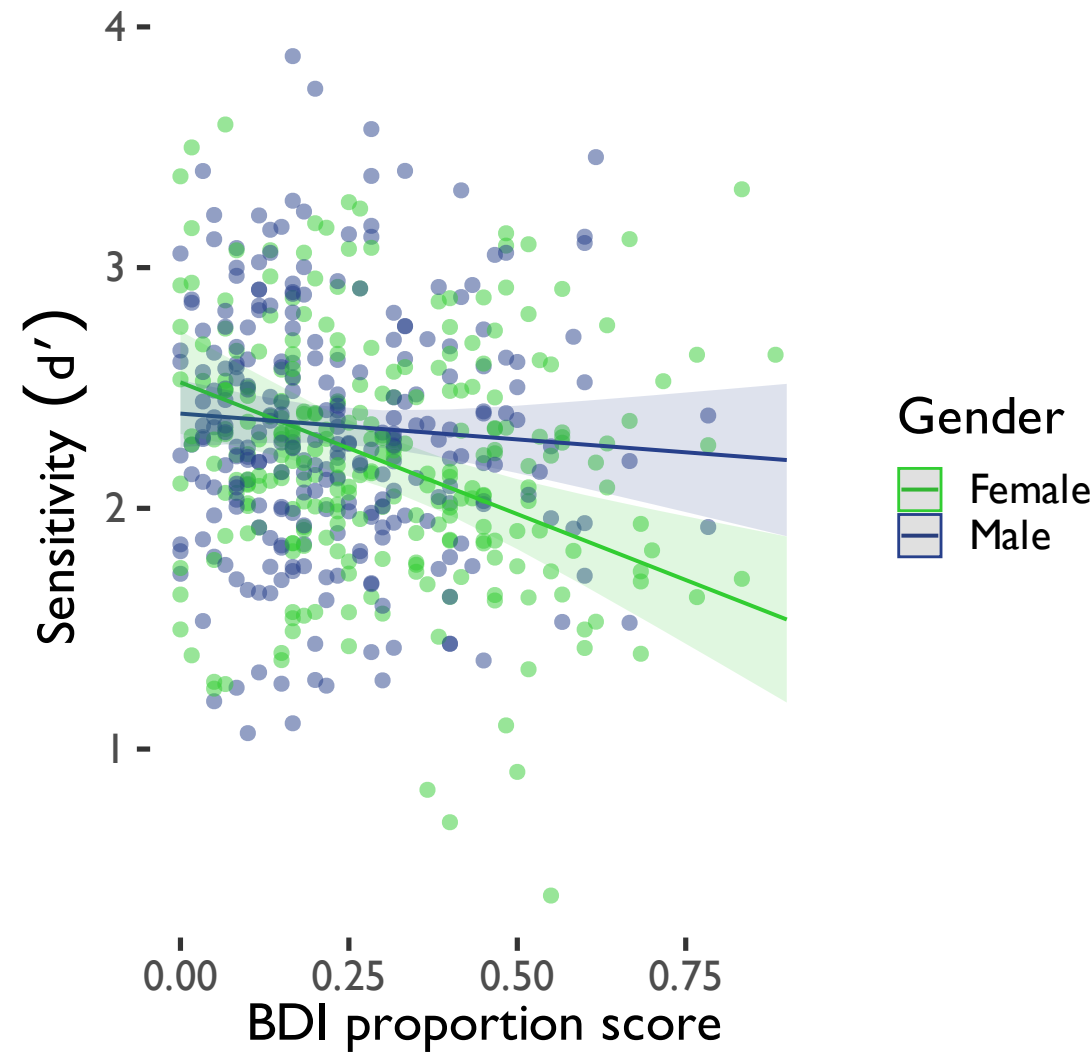**Gender**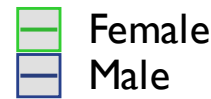

**A**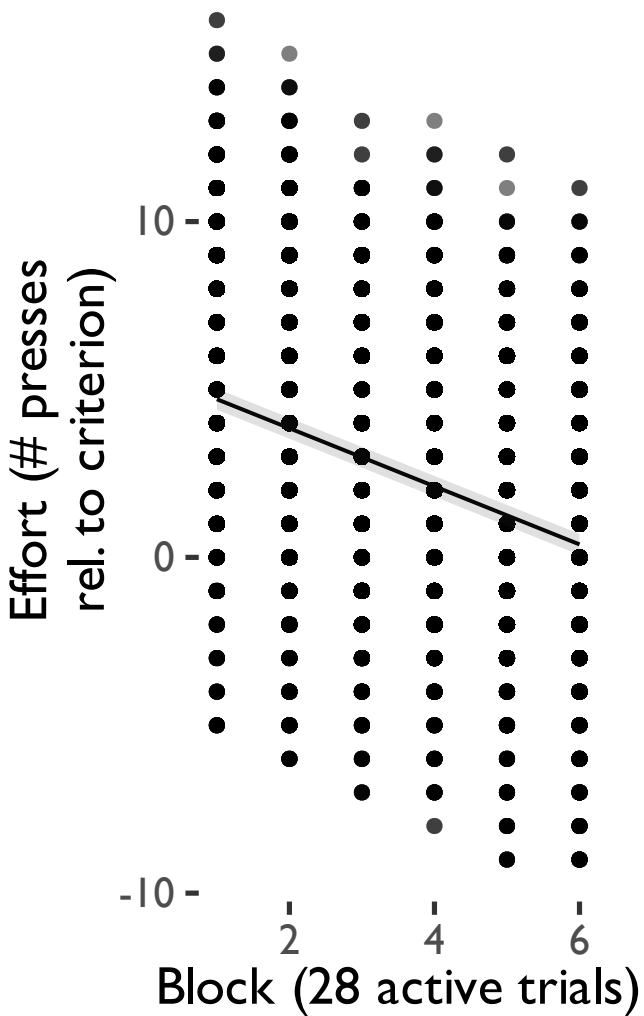**B**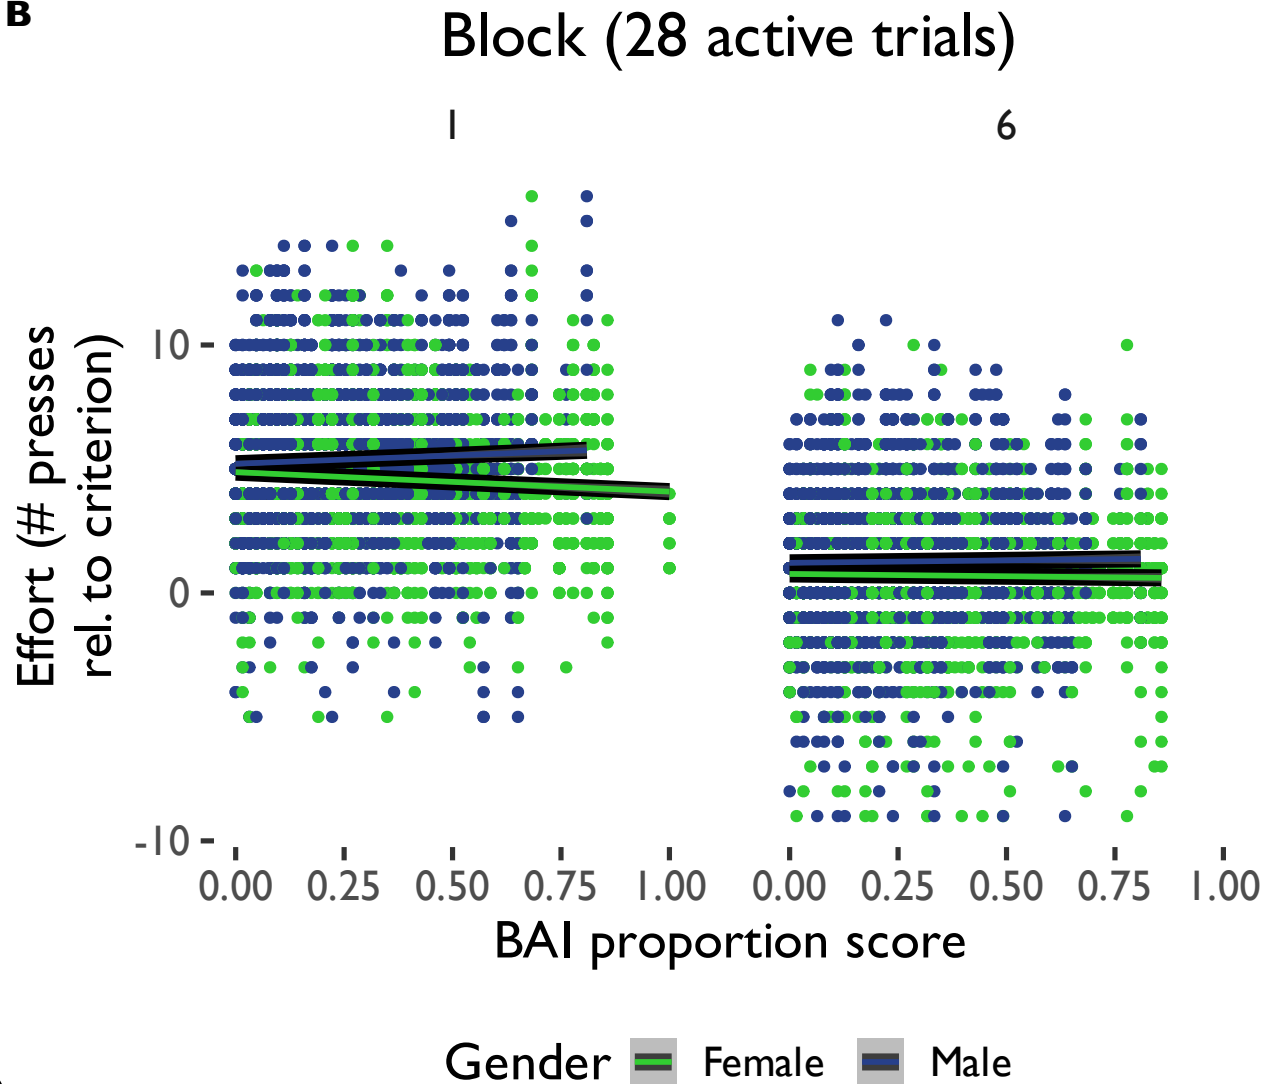

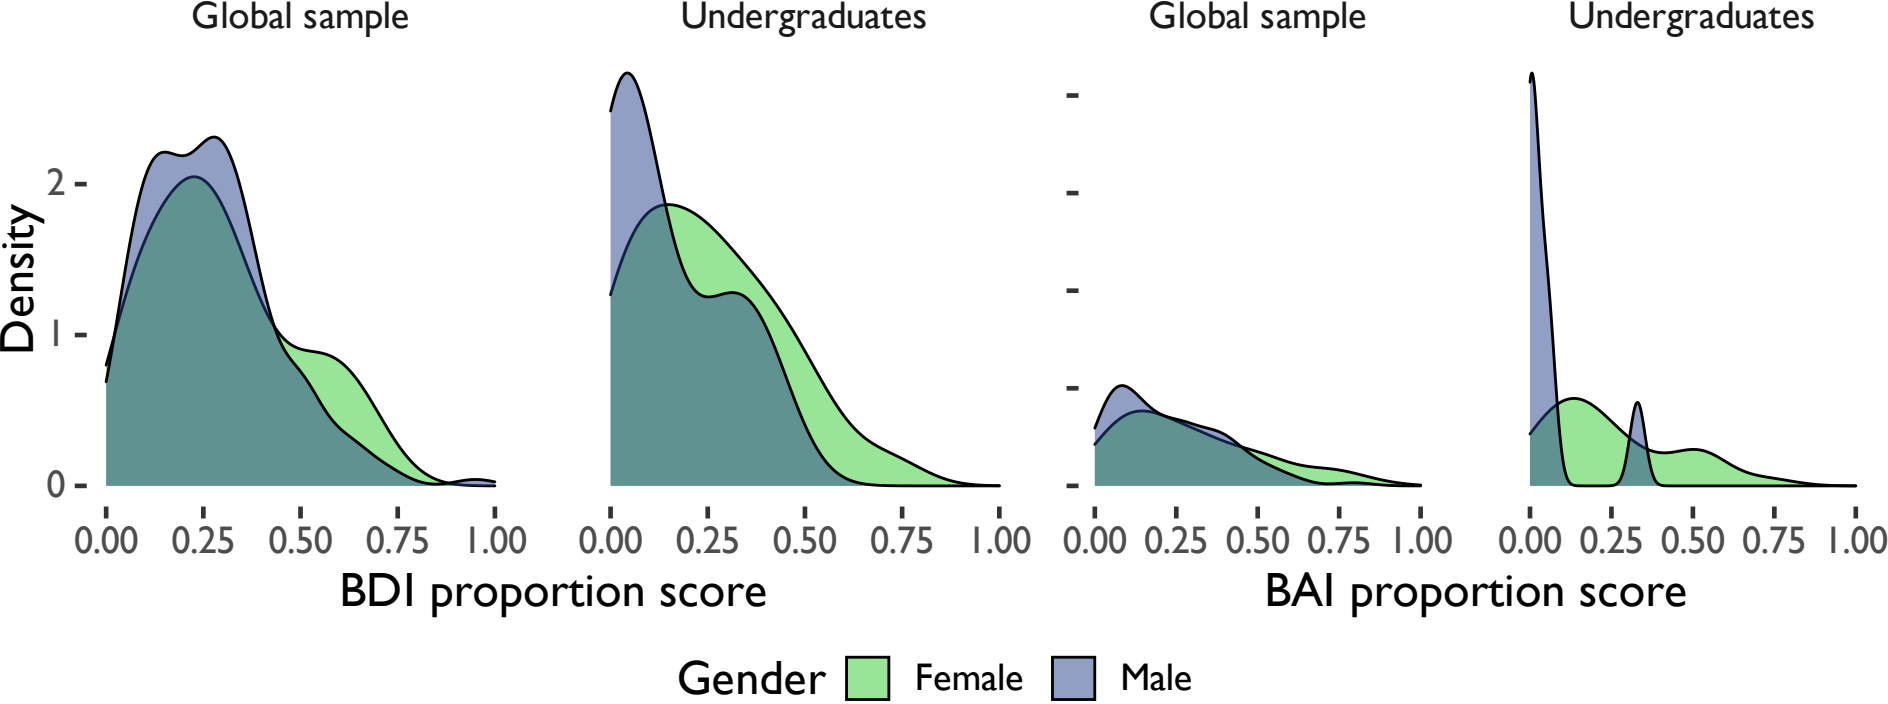

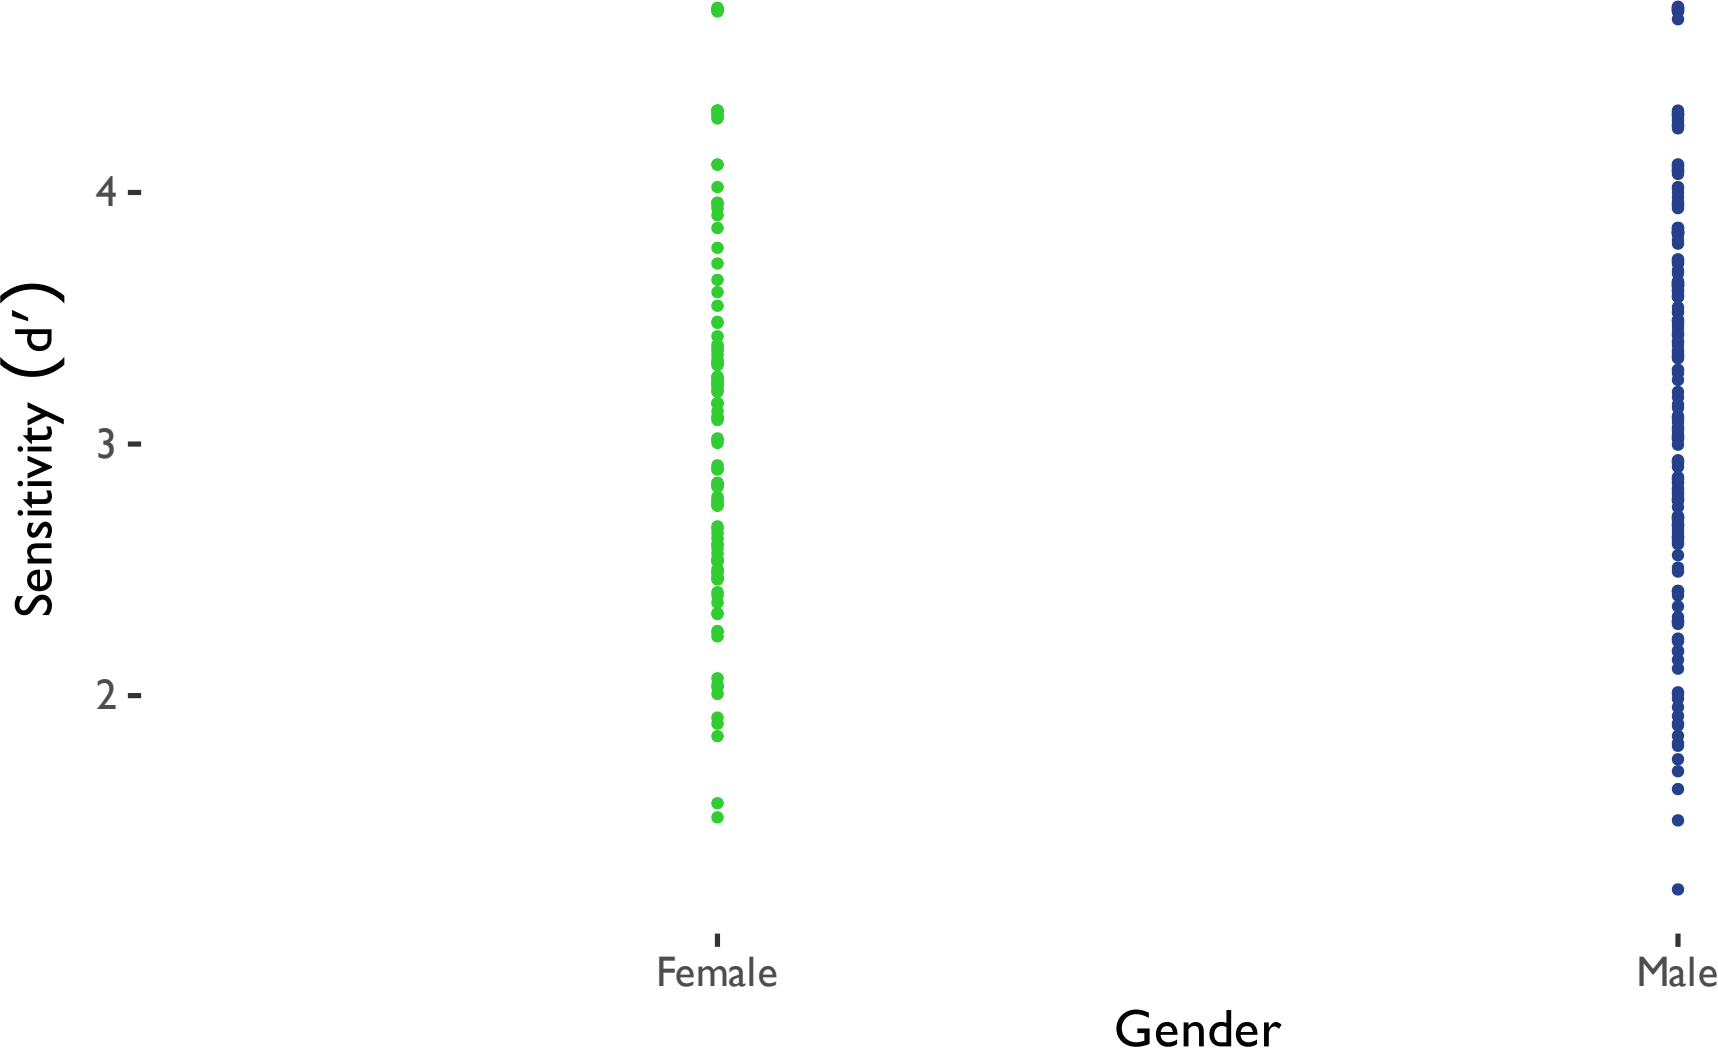



**A**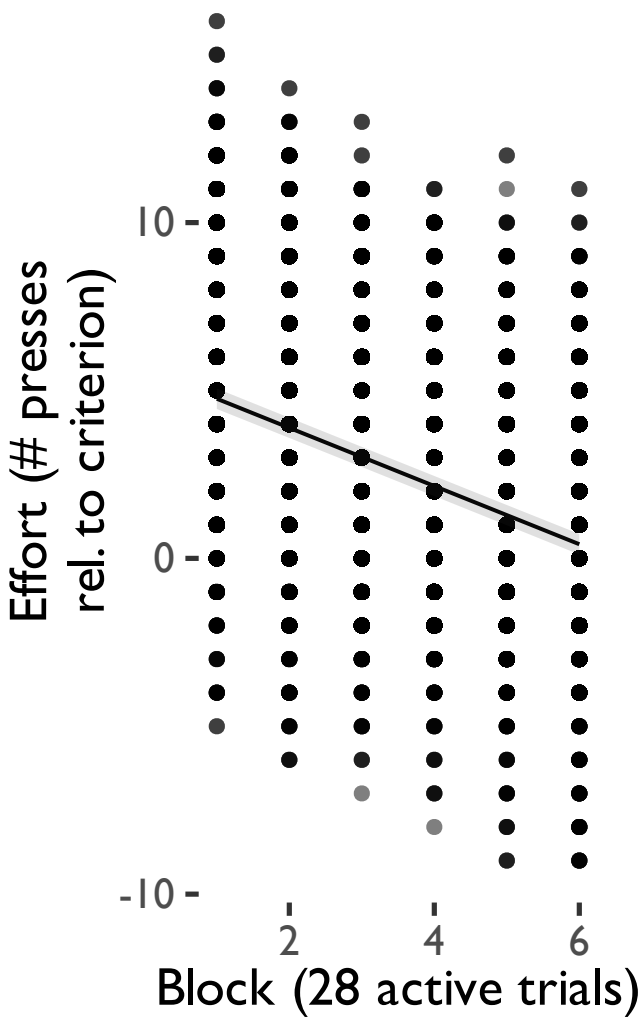**B**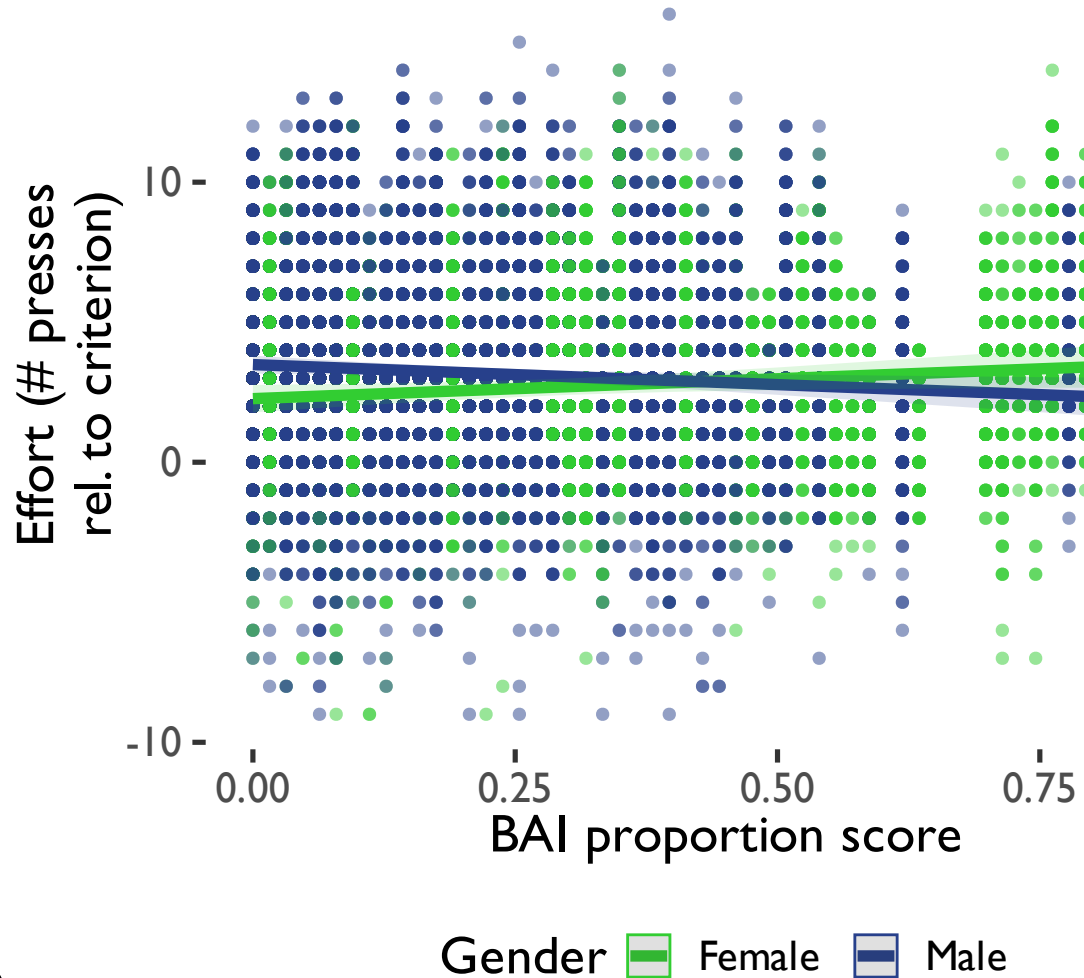

Source: https://www.biorxiv.org/content/10.1101/2022.06.21.497075v5.full.pdf
